# Supplementary material
Source: PubMed Central journal article supplement (PMC3668848)
Supplement: JCI66451sd.pdf [file JCI66451sd.pdf]

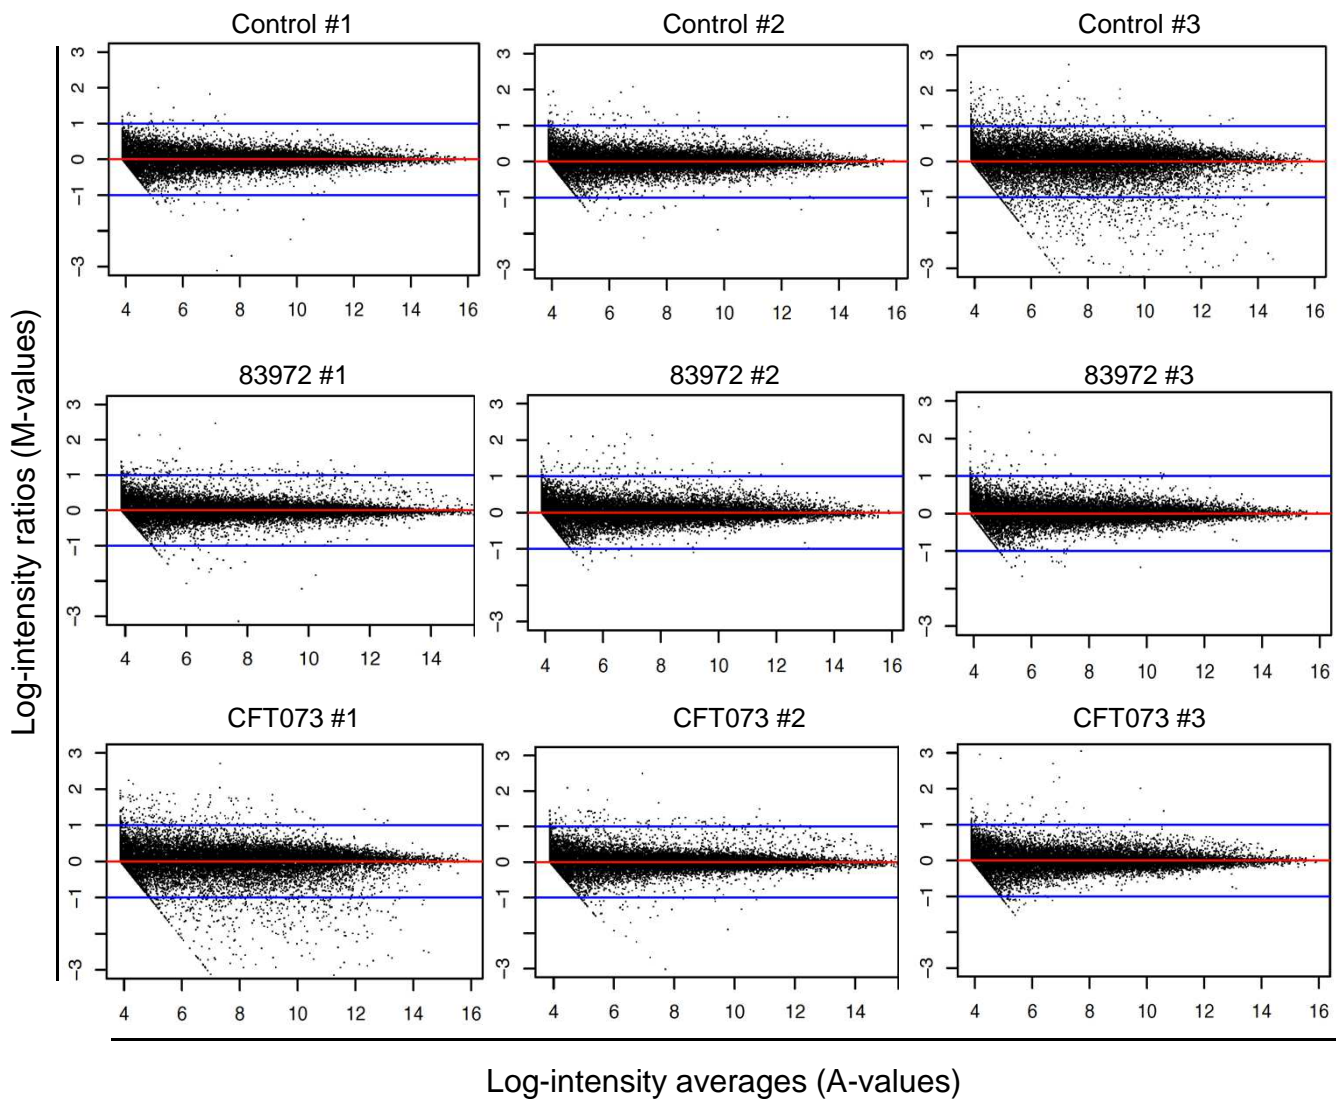

**Supplemental Figure 1. MA-plots showing normalized raw data using cross-correlation.**

The data was found to be of high quality with high replicate correlation (correlation>0.98) and with no systematic bias.

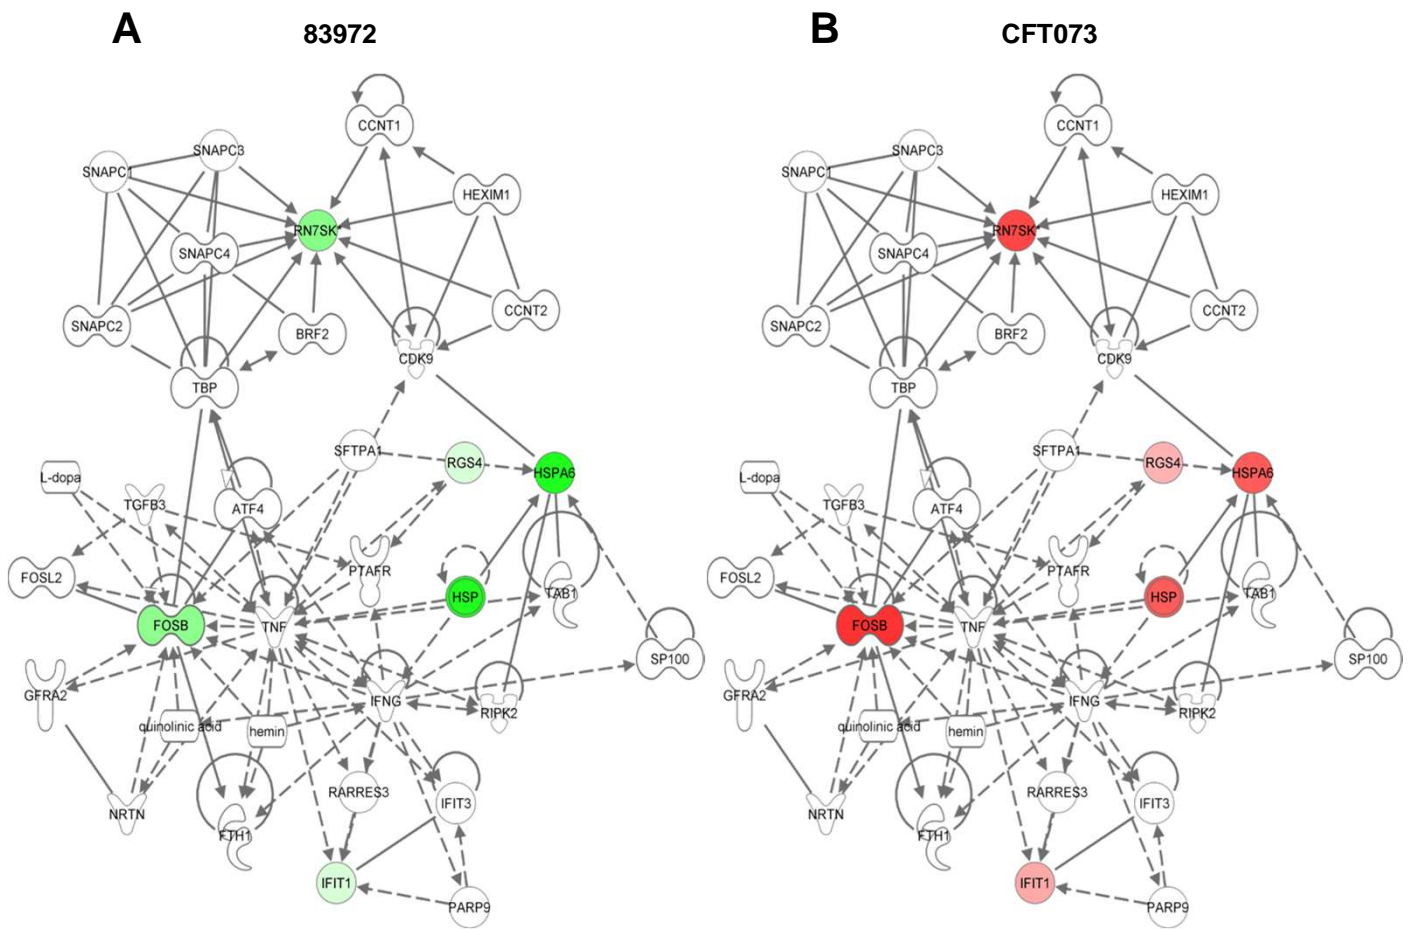

**Supplemental Figure 2. Inversely regulated gene networks generated by IPA.**

The five inversely regulated genes belonged to one functional network in which HSPA6, FOSB and RN7SK interact with TATA box binding protein (TBP), a general transcription factor required for RNA polymerase II activity. The ABU strain 83972 (A) suppressed *FOSB* and other genes in this network while the CFT073 strain (B) enhanced their expression. 83972 also suppressed *RGS4*, a negative regulator of G-protein-coupled receptor-induced signaling and *IFIT1*, a gene of the type I IFN signaling pathway essential for the antibacterial effector response.

**A**

| Network genes                                                                                                                                                                                                                                                                                                       | Score | No of affected genes | Top functions                                                                        |
|---------------------------------------------------------------------------------------------------------------------------------------------------------------------------------------------------------------------------------------------------------------------------------------------------------------------|-------|----------------------|--------------------------------------------------------------------------------------|
| BAIAP2, BANP, BRIX1, Caspase, CTNNB1, Cyclin A, DACH1, EMP1, EPHA4, FGFBP1, GADD45G, HES1, HIST2H2BE, IgG, IL12, Interferon $\alpha$ , Jnk, MAVS, MDM2, NFkB, NOD1, P38 MAPK, PDCD4, PELI2, PEMT, Ras homolog, TFAP2A, TLR5, TNFRSF10D, UBC, Ubiquitin, VANGL2, VARS, Vegf, ZC3HAV1                                 | 51    | 24                   | Infection Mechanisms, Infectious Disease, Endocrine System Development and Function  |
| AHCTF1, AKR1C2, ALOX5AP, ARL4A, BAMBI, BAZ2B, Bcl9-Cbp/p300-Ctnnb1-Lef/Tcf, BRF2, CA9, Ca2+, CNN2, CRIP1, CTNNB1, CTNN $\beta$ -LEF1, DDX20, DKK3, ECM1, EXOC1, FAM27E3, HIF1A, HIST1H2AC, MYC, OSR2, PDXDC2, PRNP, RCN1, RPL41, SOX4, SOX17, TAX1BP3, TCF4-CTNN $\beta$ , TGFB1, TRIM9, TRPM8, TYRP1               | 27    | 15                   | Small Molecule Biochemistry, Cellular Development, Cellular Growth and Proliferation |
| ARRDC3, CYP26B1, DBF4, DHCR24, E2F4, ETV3, FAM105A, FAM63A, FKBP3, FKBP9, LHX1, MT1L, MYCN, NAA38, POLA1, POLH, PRIM1, PRIM2, REST, RNF40, RPL11, RPL23, RPL26, RPS13, SMC2, TAGLN, TFAP4, TNF, TOP2B, TP53, TP53I3, TP53INP1, UBE2E3, ZBTB11, ZNF451                                                               | 17    | 10                   | Infection Mechanisms, Cancer, Gene Expression                                        |
| ARHGAP32, ARL4D, CALD1, CNPY2, Cofilin, DNAJA1, EIF3CL, EPHA2, ERBB2IP (includes EG:55914), HRAS, IL24, KRAS, KSR1, MBOAT2, Mrlc, MYH10, MYL12B, MYLIP, NFkB, PPFIBP1, PTPRJ, RABGEF1, Raf, RAP1GDS1, RARRES3, RASA1, RASGRF1, RASSF1, S100A4, SCNN1A, SHOC2, TCOF1, TNFRSF10A (includes EG:8797), TNFRSF10B, TOP2A | 10    | 6                    | Cancer, Cell Morphology, Cellular Assembly and Organization                          |

**B**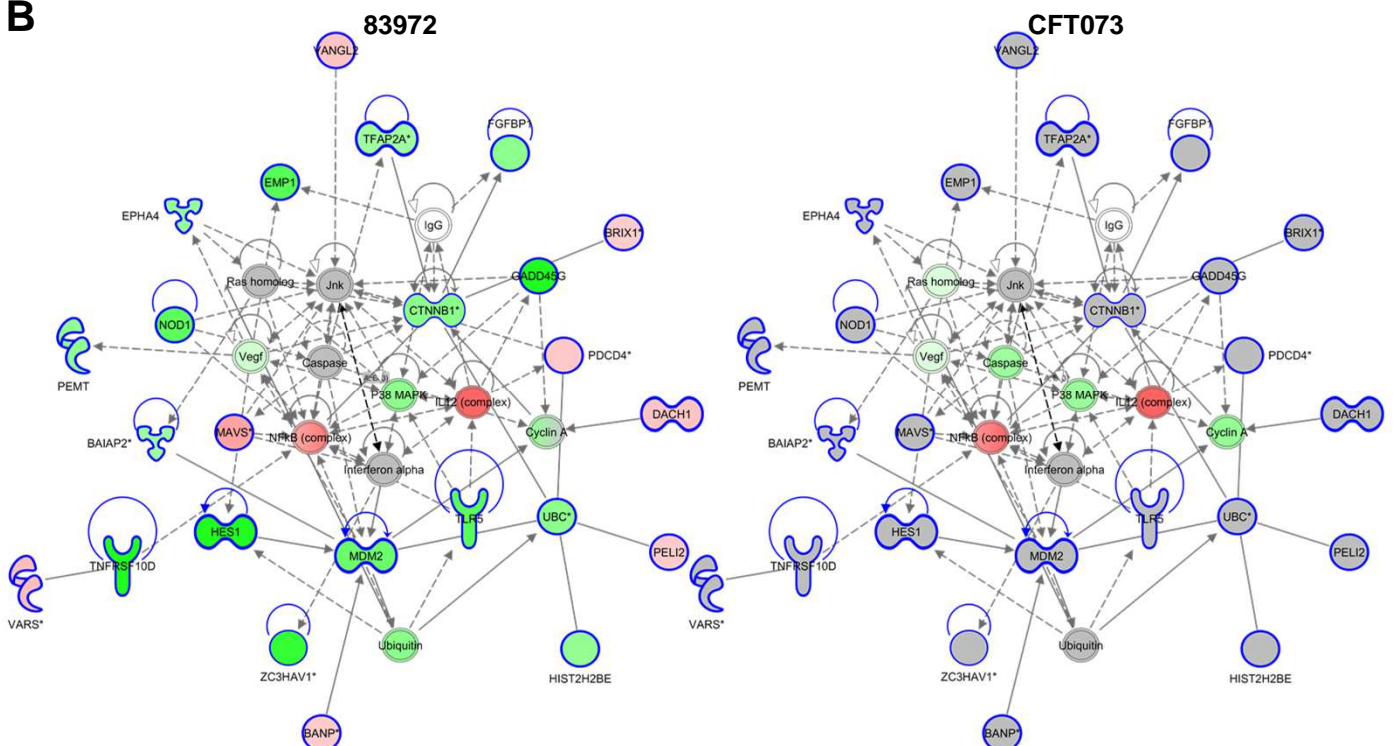

### Supplemental Figure 3. 83972 specific networks.

(A) The top four networks are shown. (B) 83972-specific gene network of 24 genes including transcriptional repressors (*DACH1*, *PDCD4*, *BANP*), transcription factors (*HES1*, *MDM2*), innate immunity receptors (*TLR5*, *NOD1*), genes involved in TNF signaling (*TNFRSF10D*, *TFAP2A*), G-protein signaling (*BAIAP2*) and activators of MAPK signaling (*GADD45G*, *FGFBP1*). These genes were unaffected by the CFT073 strain (green=down-regulated, red=up-regulated, grey=genes expressed at basal level, blue=83972 specific genes).

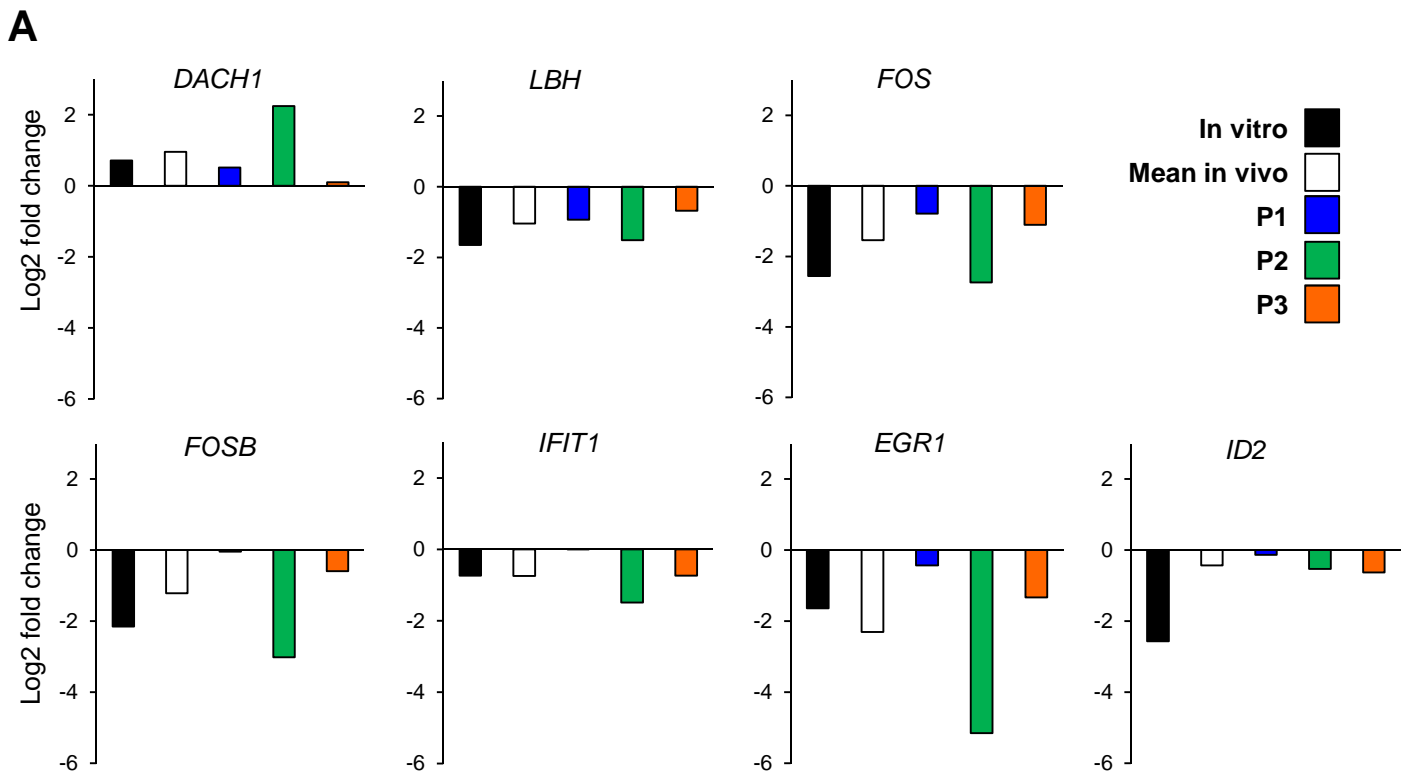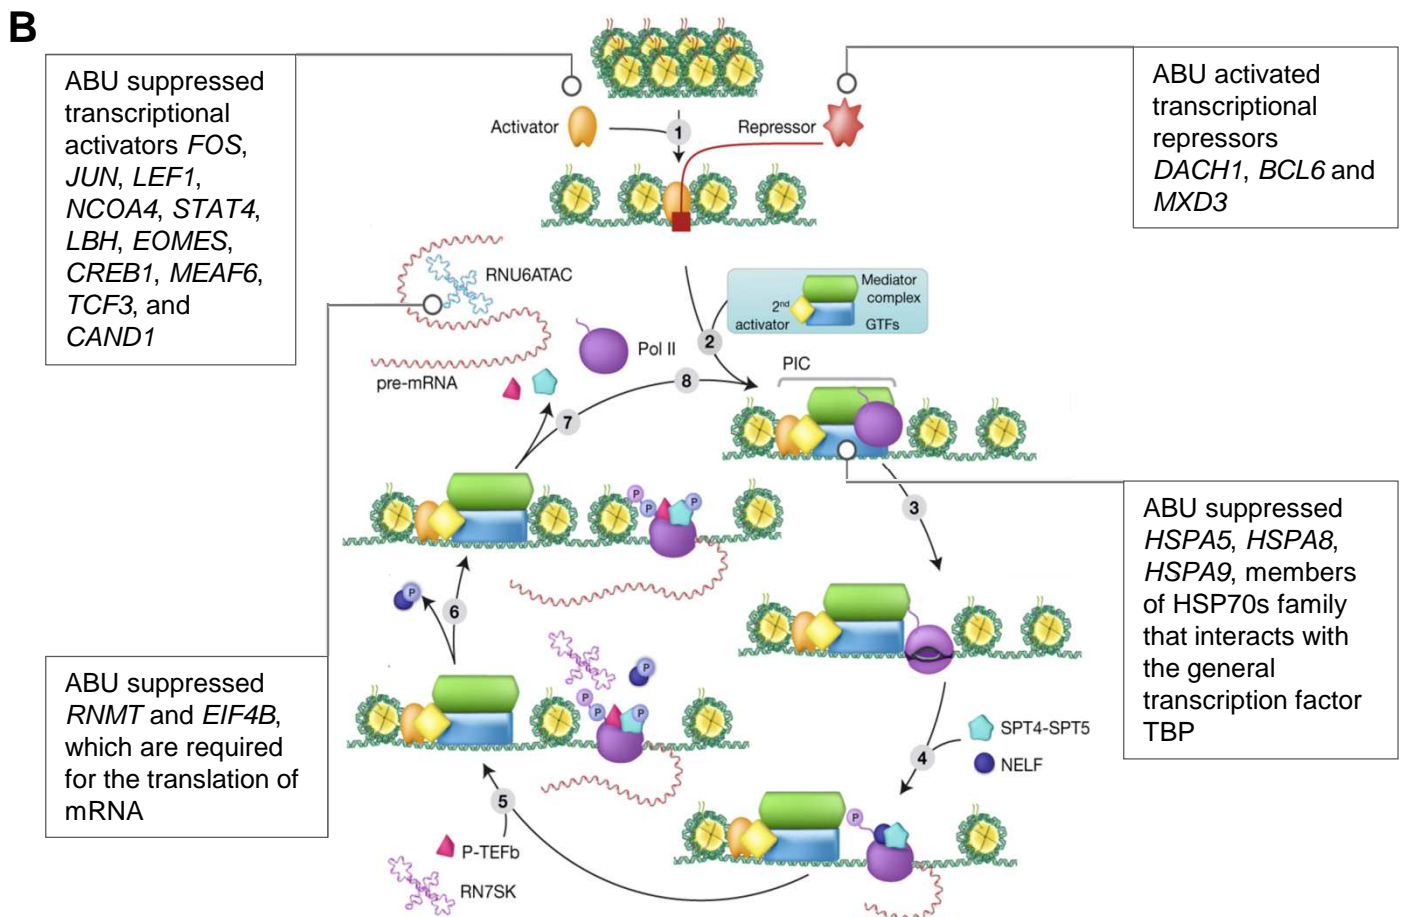

**Supplemental Figure 4. Transcriptional regulation by the 83972 strain in vivo.**

(A) Comparison of in vitro and in vivo expression of Pol II related genes (B) Genes regulated after 24 hours in vivo by the 83972 strain are shown relative to specific steps in the Pol II transcription cycle (unadjusted p-values <0.05 and absolute log<sub>2</sub> fold change >0.5).

**A**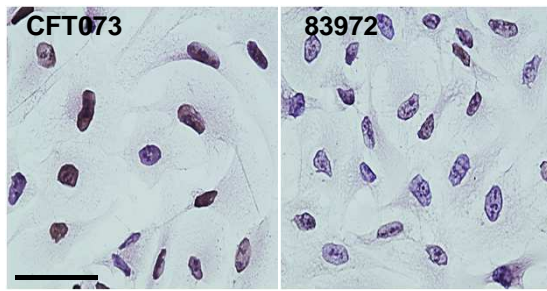**B**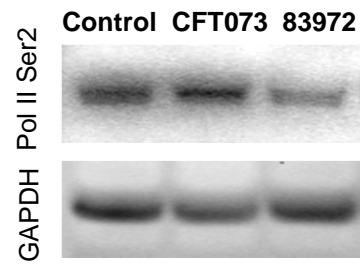**C**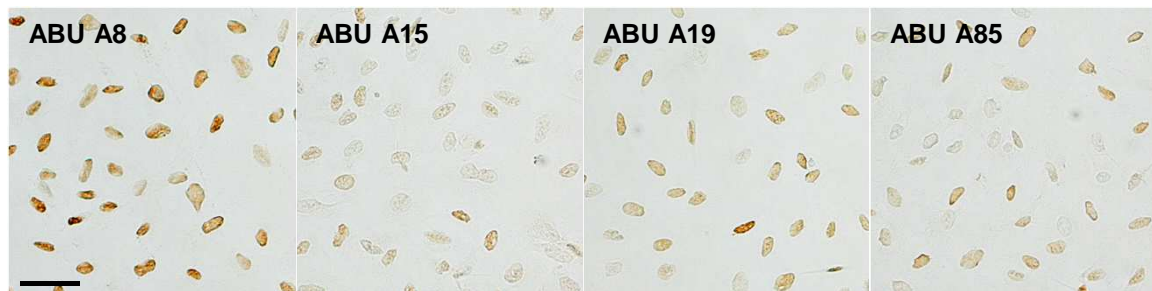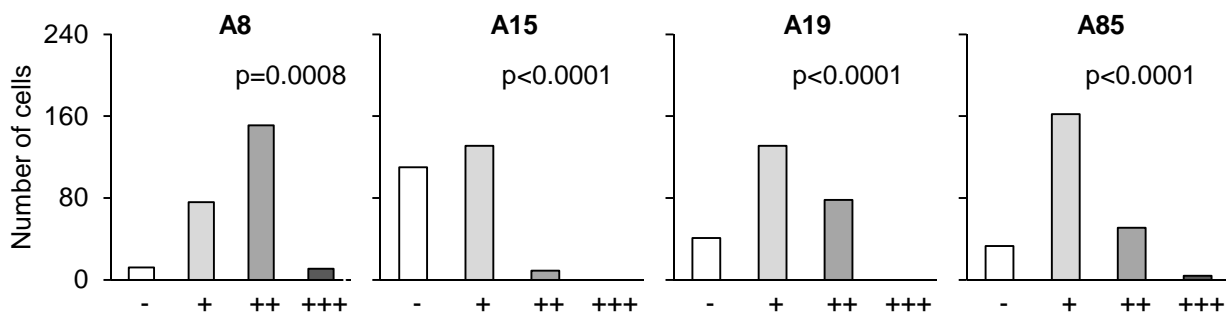

### Supplemental Figure 5. Validation of proteomic results.

(A) Nuclear Pol II phosphorylation and Htx-eosin counter-staining of A498 kidney epithelial cells after stimulation with the 83972 and CFT073 strains. (B) Western-blot showing inhibition of Pol II Ser2 phosphorylation by the 83972 but not the CFT073 strain. (C) Pol II inhibition by four different *E. coli* strains isolated from asymptomatic carriers of the same epidemiological group (compared to uninfected cells, Chi-squared test for independence). Scale bars = 50  $\mu$ m.

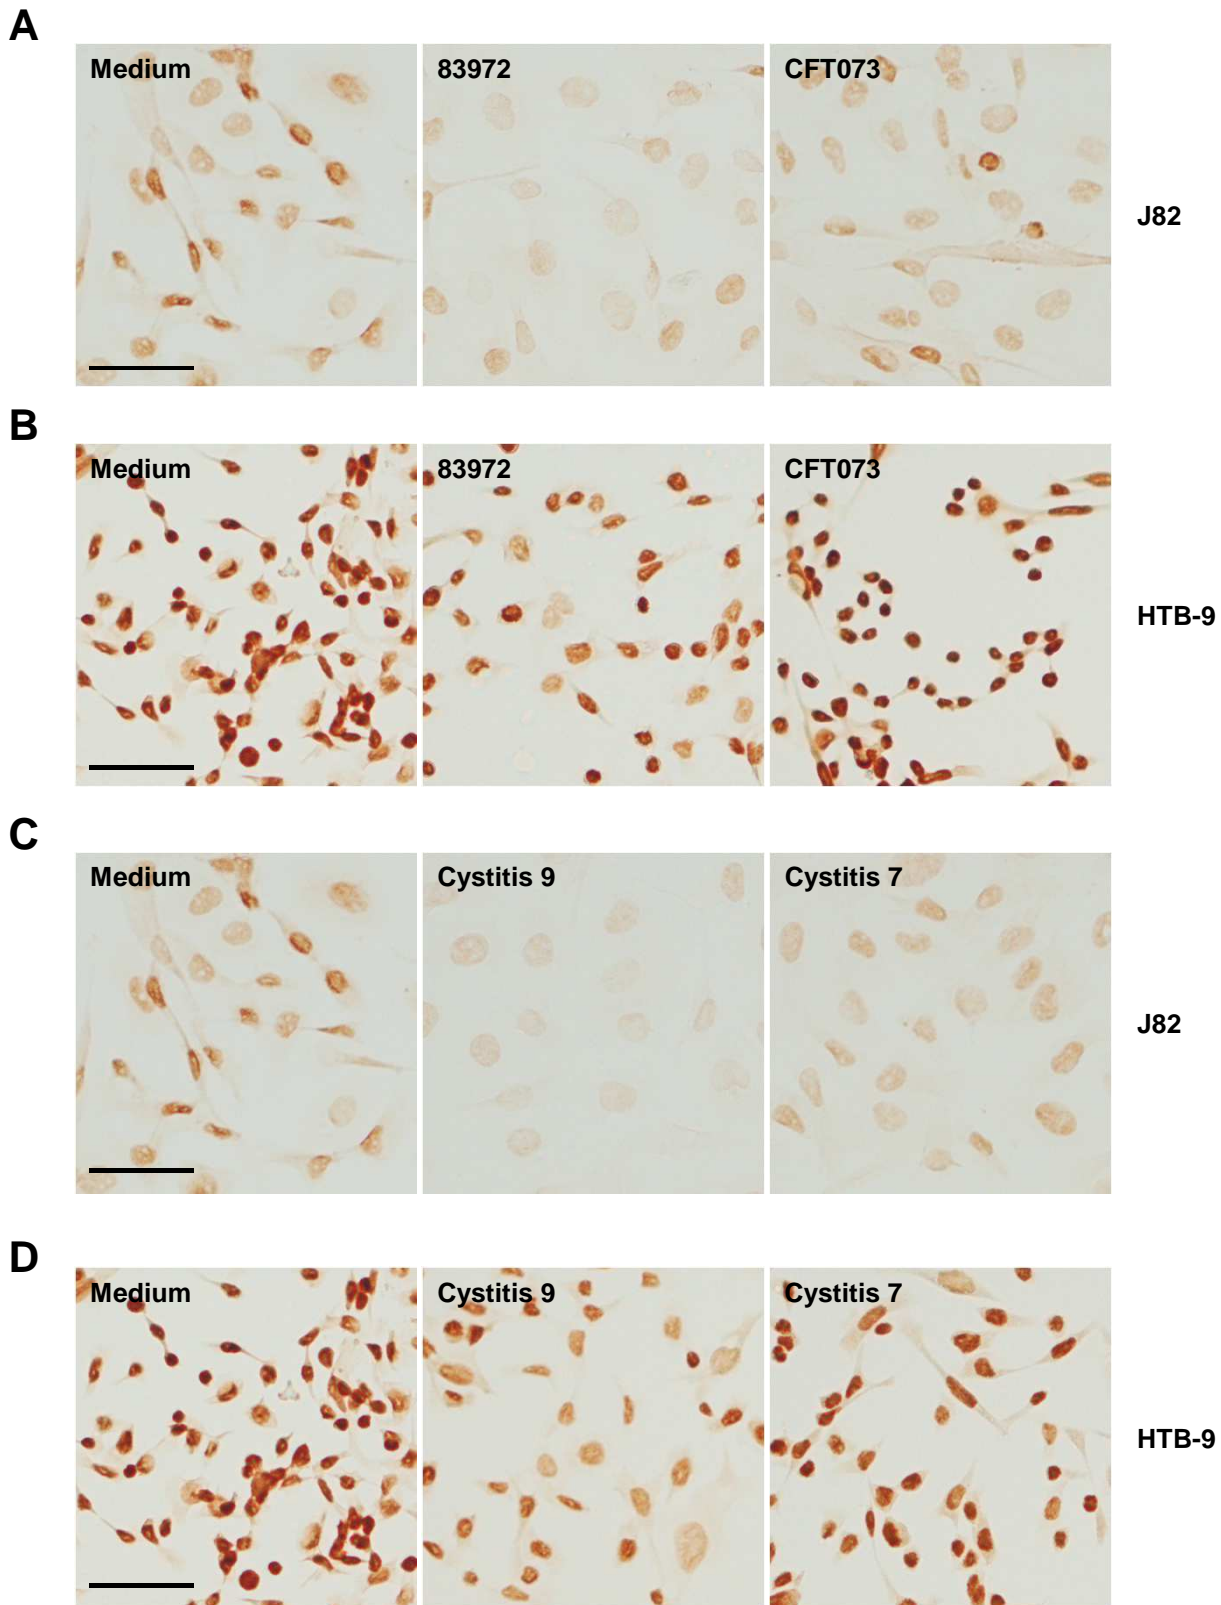

**Supplemental Figure 6. Pol II inhibitor effect on bladder cancer cell lines in vitro .**

(A) Inhibition of Pol II by 83972 in J82 cells. (B) Inhibition of Pol II by 83972 in HTB-9 cells. (C) Pol II inhibition by inhibitory cystitis strain C9 compared to non-inhibitory cystitis strain C7 in J82 cells. (D) Pol II inhibition by inhibitory C9 strain compared to non-inhibitory C7 strain in HTB-9 cells. Scale bars = 50  $\mu$ m.

**A**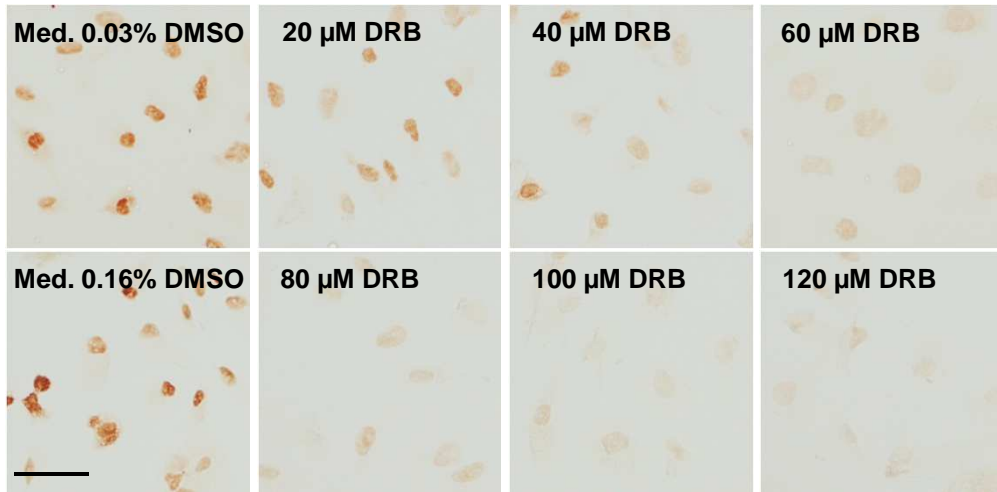**B**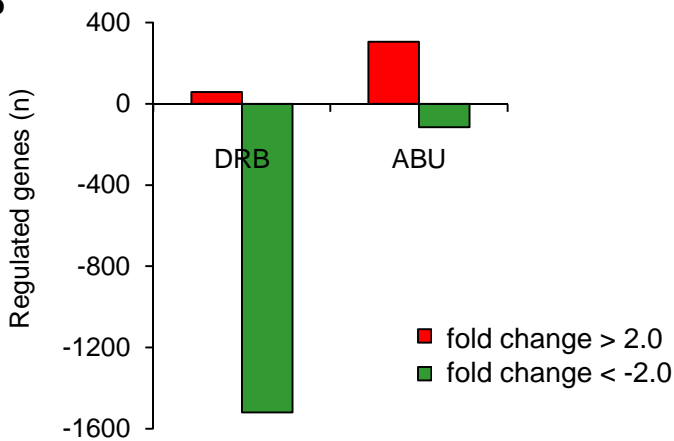**C**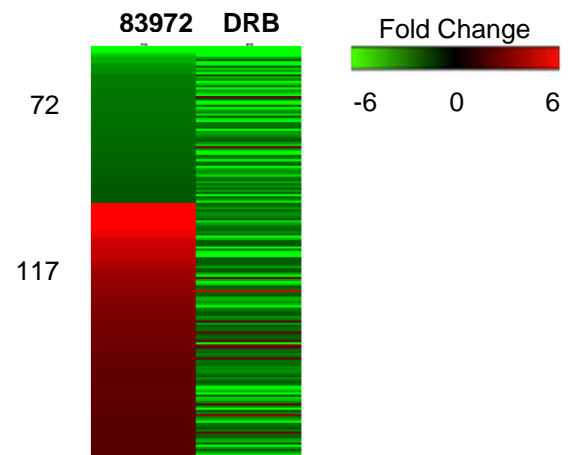**D**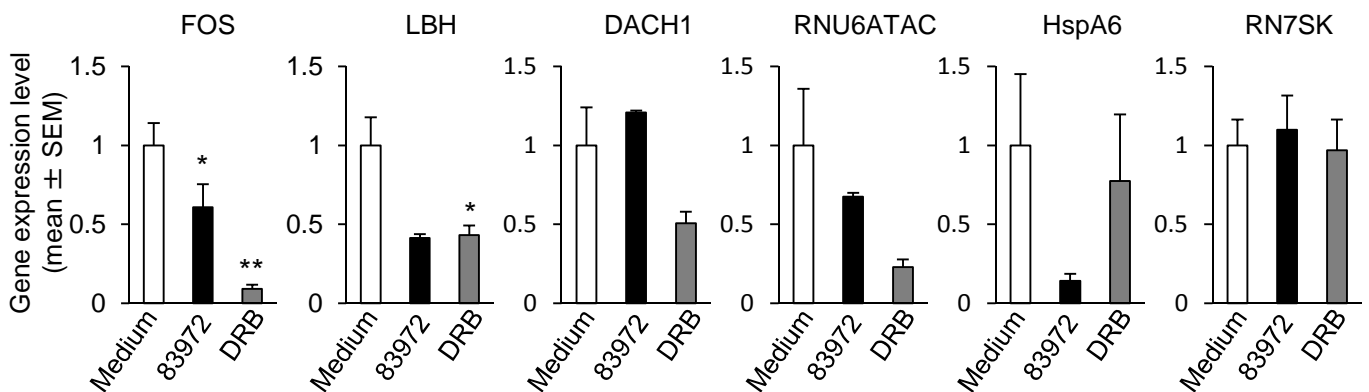

### Supplemental Figure 7. Pol II inhibitor effect on A498 cells in vitro.

(A) Dose-dependent effect of DRB on Pol II phosphorylation. (B) Regulated genes by 83972 and DRB, cut-off with absolute fold change > 2, red = upregulated, green = downregulated. (C) Heat-map of commonly regulated genes (D) RT-PCR verification of transcriptomic data (unpaired t-test compared to Medium, \* $p < 0.05$ , \*\* $p < 0.01$ ). Scale bar = 50  $\mu\text{m}$ .

**A**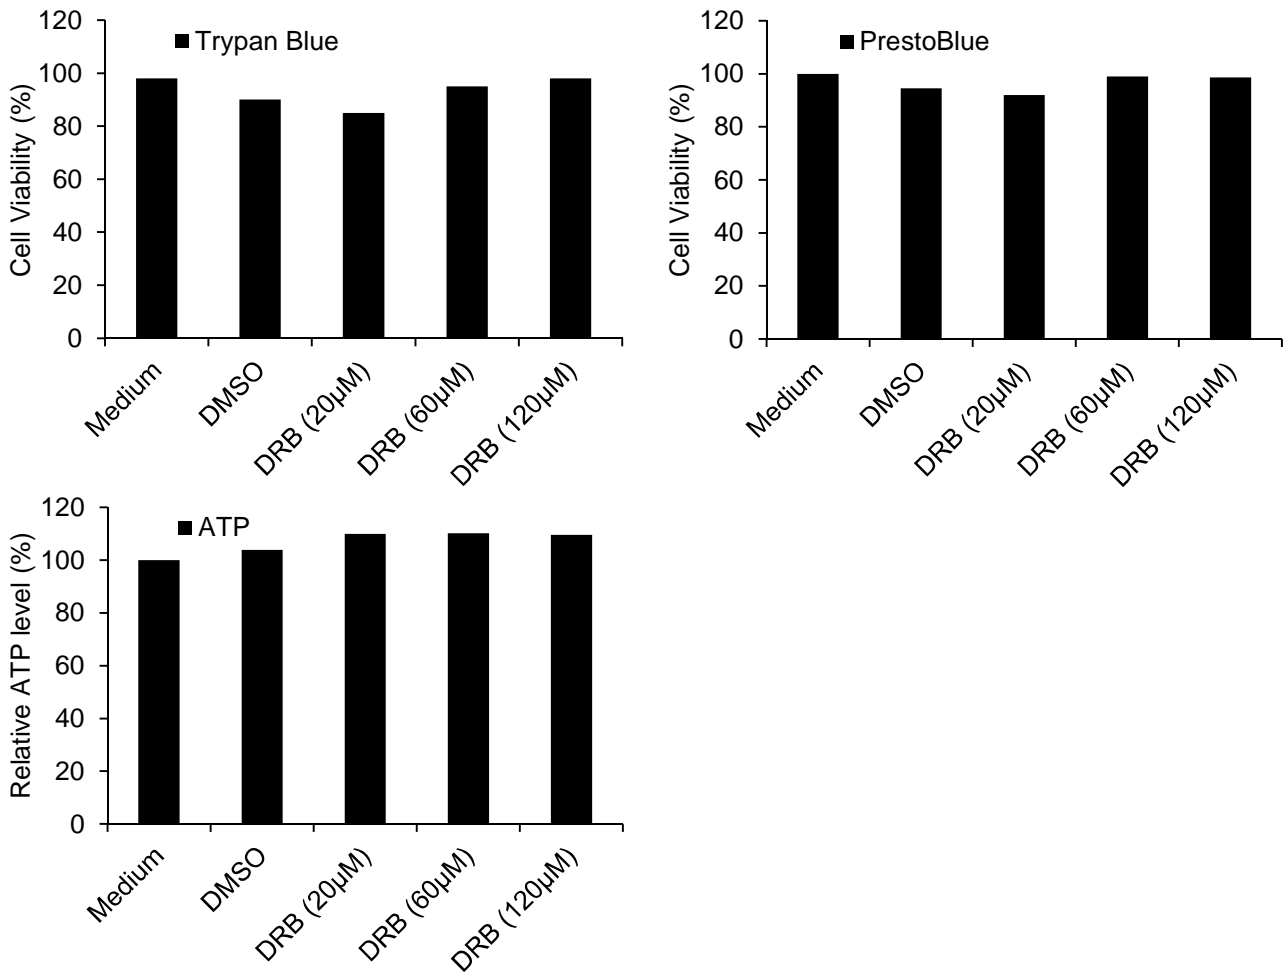**B**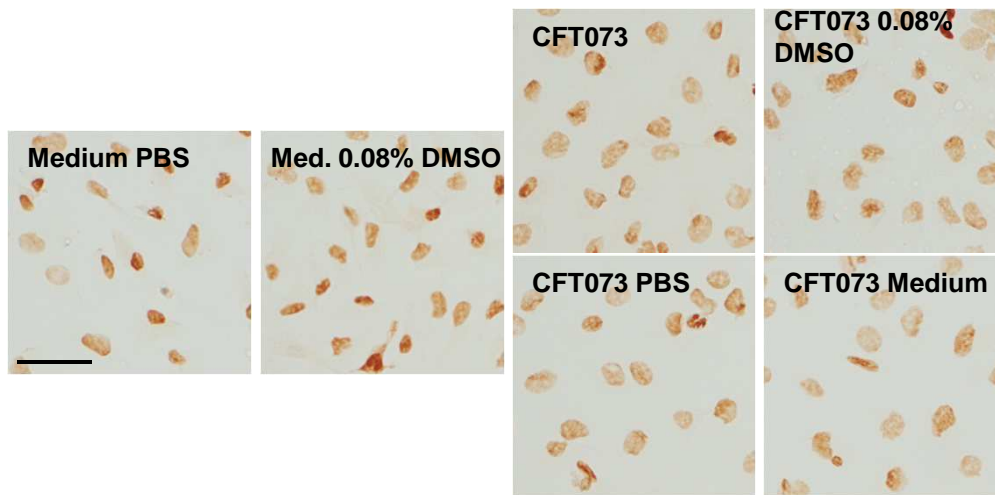**Supplemental Figure 8. Cell viability essays after DMSO and DRB treatment.**

(A) A498 cells were exposed to DRB for four hours and changes in cell viability by Trypan blue and Prestoblue and cellular ATP level were measured. No significant change in cell death was observed even at high concentration of DRB (120µM), thus DRB at these concentrations is not causing cell death. A high concentration of DMSO (0.16%) was used as a control. (B) 0.08% of DMSO did not affect Pol II phosphorylation. This concentration of DMSO correspond to the amount used for 60µM of DRB. Scale bar = 50 µm.



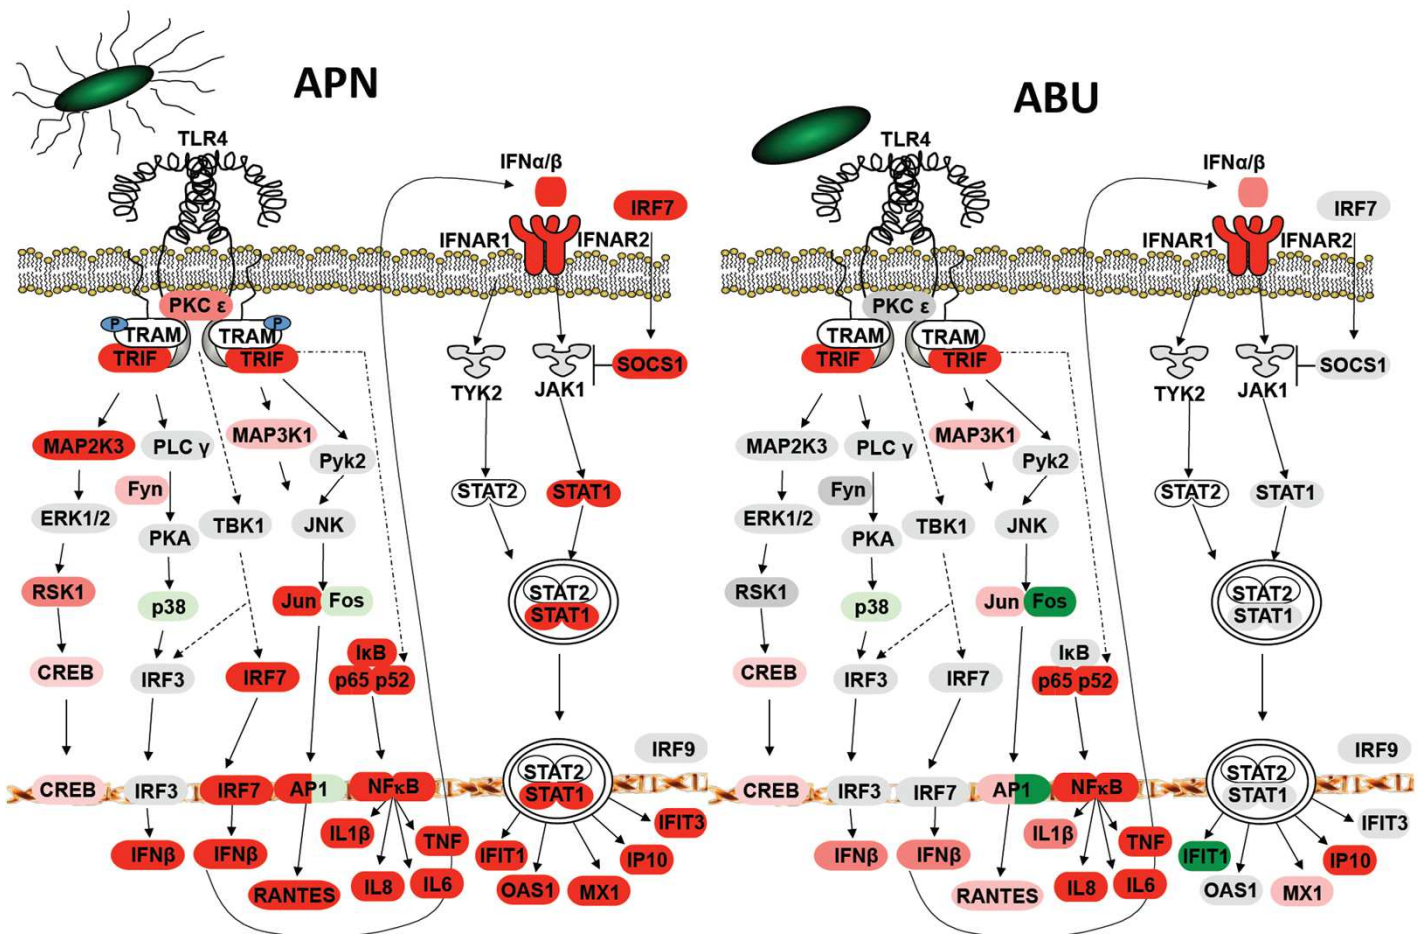

**Supplemental Figure 9. Suppression by the 83972 strain of pathogen-specific signaling in infected A498 cells.**

Transcriptomic analysis of genes involved in the TLR4/CREB/IRF3/7 pathway and the Type 1 IFN pathway as well as cytokine genes. Activation by the CFT073 strain of gene (left) expression versus suppression by the 83972 strain (right) of genes in these pathways is shown. For log fold change of individual genes, see Supplemental Table 5. Increased expression=red, reduced expression=green, no change=gray. The color intensity reflects the fold change.

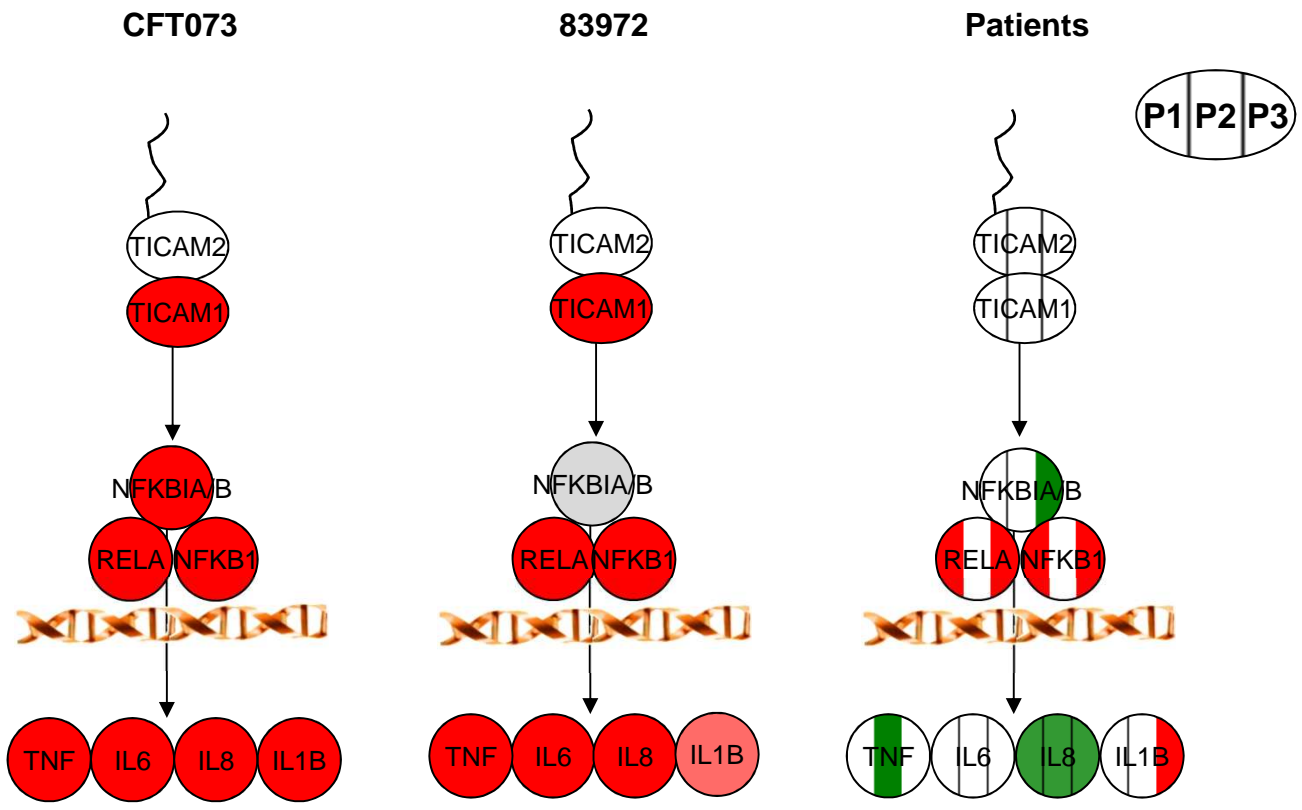

**Supplemental Figure 10. NFκB signaling pathway.**

Increased expression=red, reduced expression=green, no change=gray. For log fold change of individual genes, see Supplemental Tables 1 and 5.

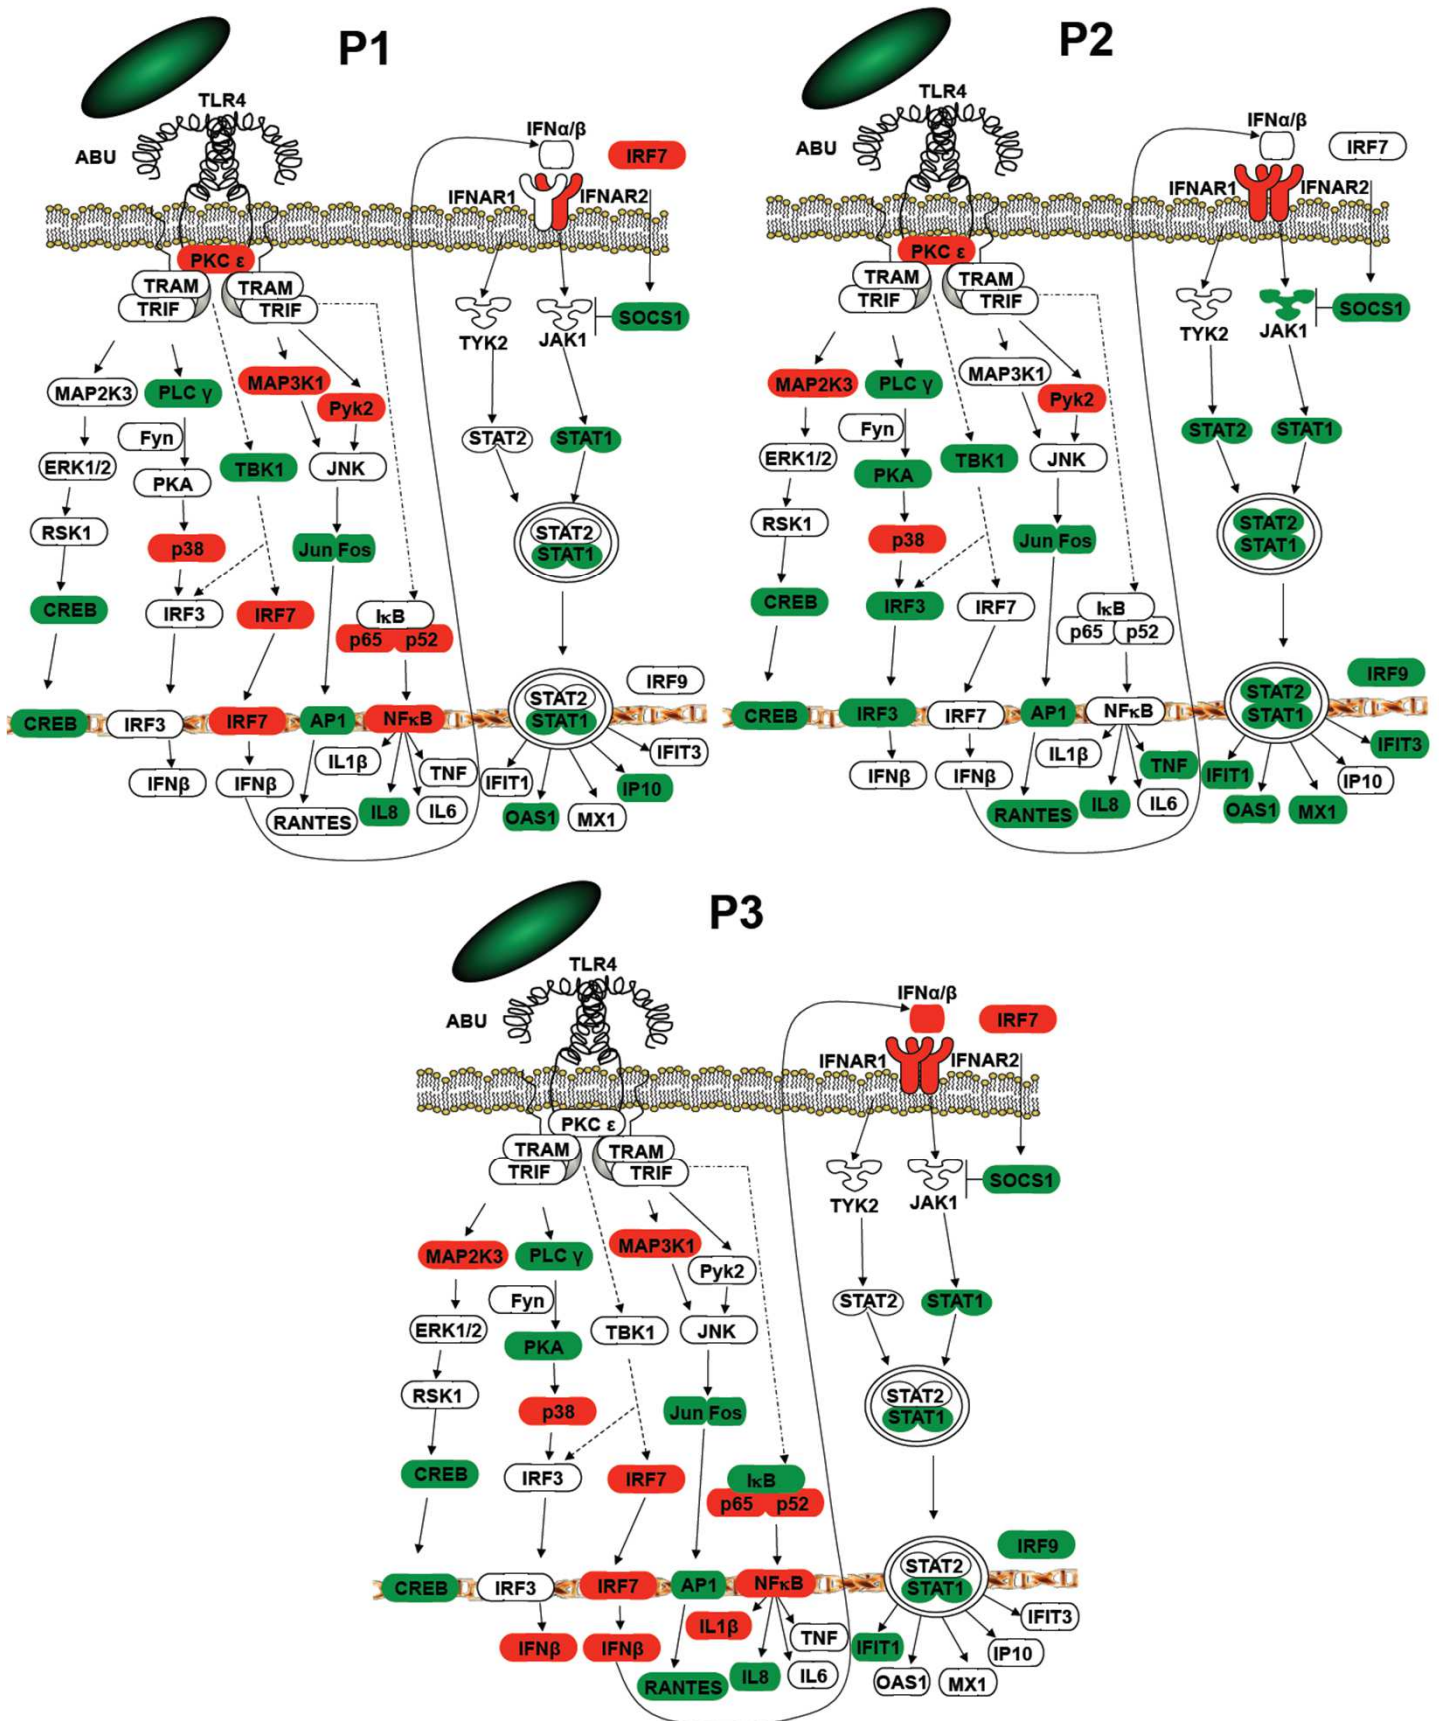

**Supplemental Figure 11. Suppression by the 83972 strain of pathogen-specific signaling in inoculated patients.**

Inhibition of the TLR4/CREB/IRF3/7 pathway in inoculated patients and suppression of type I IFN signaling. Increased expression=red, reduced expression=green, no change=gray. For log fold change of individual genes, see Supplemental Table 1.

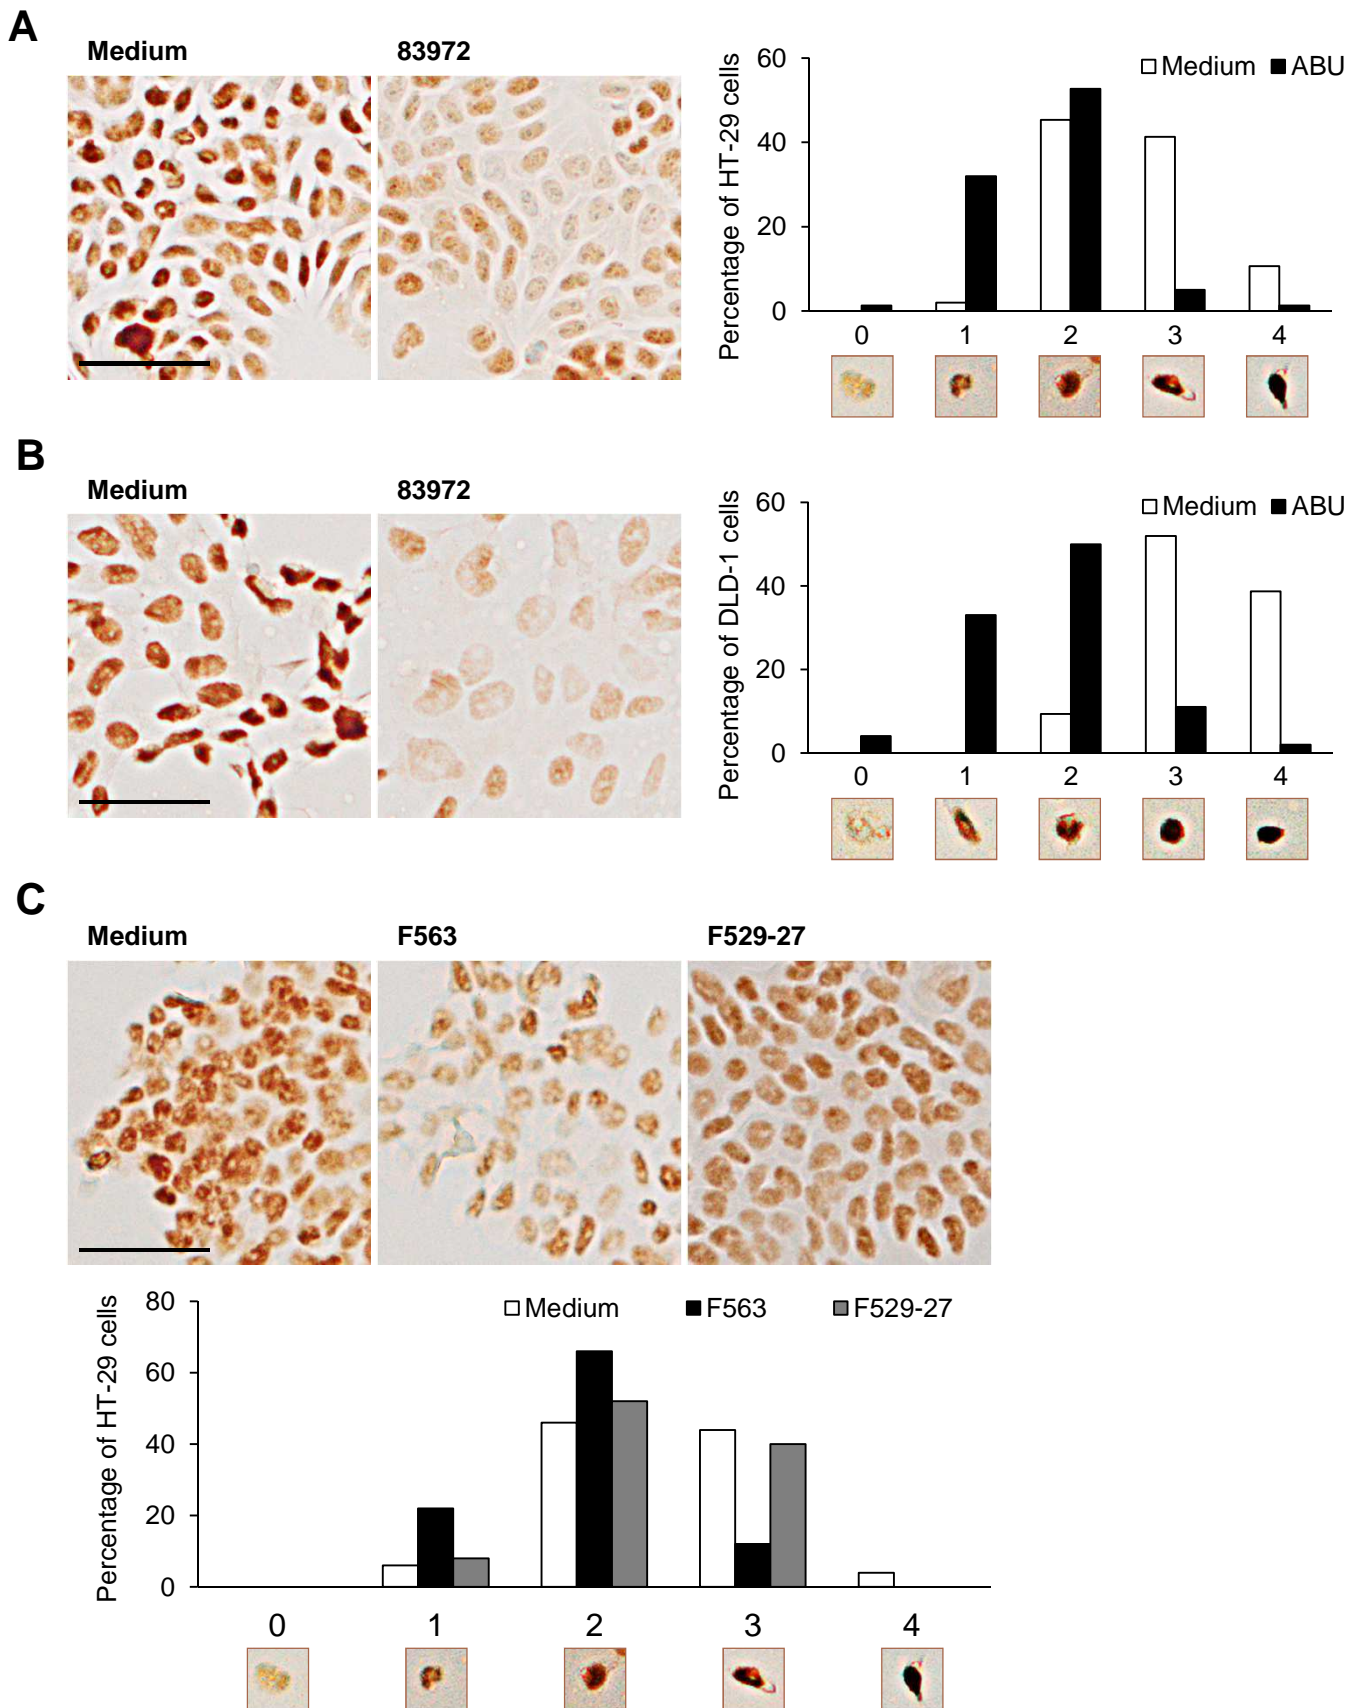

**Supplemental Figure 12. Pol II inhibitor effect on colon cancer cells in vitro.**

(A) Inhibition of Pol II by 83972 in HT-29 cells. (B) Inhibition of Pol II by 83972 in DLD-1 cells. (C) Pol II inhibition by inhibitory fecal strain F563 compared to non-inhibitory fecal strain F529-27 in HT-29 colon cancer cells. Scale bars = 50  $\mu$ m.

**Supplemental Table 1.** Commonly regulated genes in all three patients after inoculation with *Escherichia coli* 83972.

| Symbol                                                 | Entrez Gene Name                                                             | Log Ratio | Function                                                                       |
|--------------------------------------------------------|------------------------------------------------------------------------------|-----------|--------------------------------------------------------------------------------|
| <b>Transcriptional regulators</b>                      |                                                                              |           |                                                                                |
| <b>a) Transcriptional repressors</b>                   |                                                                              |           |                                                                                |
| <i>BCL6</i>                                            | B-cell CLL/lymphoma 6                                                        | 1.20      | Transcriptional repressor                                                      |
| <i>SIN3A</i>                                           | SIN3 transcription regulator homolog A (yeast)                               | -0.70     | Transcriptional repressor                                                      |
| <i>SET</i>                                             | SET nuclear oncogene                                                         | -0.71     | Negative regulation of histone acetylation                                     |
| <i>PBXIP1</i>                                          | Pre-B-cell leukemia homeobox interacting protein 1                           | -0.75     | Transcriptional repressor                                                      |
| <i>LETMD1</i>                                          | LETM1 domain containing 1                                                    | -0.83     | Suppression of p53                                                             |
| <b>b) Transcriptional activators</b>                   |                                                                              |           |                                                                                |
| <i>RFX2</i>                                            | Regulatory factor X, 2 (influences HLA class II expression)                  | 0.63      | Transcriptional activator                                                      |
| <i>CAND1</i>                                           | Cullin-associated and neddylation-dissociated 1                              | -0.60     | Positive regulation of transcription, TATA-binding protein interacting (TIP20) |
| <i>TRRAP</i>                                           | Transformation/transcription domain-associated protein                       | -0.60     | Links HAT complexes to transcriptional activators                              |
| <i>TCF3</i>                                            | Transcription factor 3 (E2A immunoglobulin enhancer binding factors E12/E47) | -0.70     | Transcriptional activator                                                      |
| <i>MEAF6</i>                                           | MYST/Esa1-associated factor 6                                                | -0.71     | Transcriptional activator                                                      |
| <i>EOMES</i>                                           | Eomesodermin                                                                 | -0.91     | Transcriptional activator involved in immune responses                         |
| <i>LBH</i>                                             | Limb bud and heart development homolog (mouse)                               | -1.04     | Transcriptional activator                                                      |
| <i>NCOA4</i>                                           | Nuclear receptor coactivator 4                                               | -1.24     | Androgen receptor transcriptional co-activator                                 |
| <i>LEF1</i>                                            | Lymphoid enhancer-binding factor 1                                           | -1.30     | Activates transcription of target genes in the presence of CTNNB1 and EP300    |
| <b>c) Zinc finger proteins, zinc-binding proteins</b>  |                                                                              |           |                                                                                |
| <i>ZNF195</i>                                          | zinc finger protein 195                                                      | -0.58     | Krüppel C2H2-type zinc-finger protein family, transcription factor             |
| <i>DCTD</i>                                            | dCMP deaminase                                                               | -0.62     | Deamination of dCMP to dUMP, zinc-binding protein                              |
| <i>ZNF146</i>                                          | Zinc finger protein 146                                                      | -0.78     | Transcription regulation                                                       |
| <i>ZNF664</i>                                          | Zinc finger protein 664                                                      | -1.00     | Transcriptional regulation                                                     |
| <b>d) Transcriptional and translational regulation</b> |                                                                              |           |                                                                                |
| <i>CNOT6L</i>                                          | CCR4-NOT transcription complex. Subunit 6-like                               | -0.57     | RNA post-transcriptional modification                                          |
| <i>RSL1D1</i>                                          | Ribosomal L1 domain containing 1                                             | -0.58     | RNA binding, translation                                                       |
| <i>WARS</i>                                            | Tryptophanyl-trna synthetase                                                 | -0.60     | Aminoacylation of tRNA, linking amino acids with nucleotide triplets           |
| <i>GSPT1</i>                                           | G1 to S phase transition 1                                                   | -0.65     | Translation termination in response to the termination codons                  |
| <i>DDX24</i>                                           | DEAD (Asp-Glu-Ala-Asp) box polypeptide 24                                    | -0.66     | Translation initiation, nuclear and mitochondrial splicing, and ribosome       |

|                                                              |                                                       |       |                                                                                                          |
|--------------------------------------------------------------|-------------------------------------------------------|-------|----------------------------------------------------------------------------------------------------------|
| <i>SRSF10</i>                                                | Serine/arginine-rich splicing factor 10               | -0.69 | and spliceosome assembly                                                                                 |
| <i>RNMT</i>                                                  | RNA (guanine-7-) methyltransferase                    | -0.71 | RNA splicing                                                                                             |
| <i>TNRC6A</i>                                                | Trinucleotide repeat containing 6A                    | -0.71 | mRNA capping                                                                                             |
| <i>CPSF6</i>                                                 | Cleavage and polyadenylation specific factor 6, 68kda | -0.72 | Post-transcriptional gene silencing, RNAi and microRNA pathways                                          |
| <i>ABCF1</i>                                                 | ATP-binding cassette, sub-family F (GCN20), member 1  | -0.78 | mRNA processing                                                                                          |
| <i>HNRNPA1</i>                                               | Heterogeneous nuclear ribonucleoprotein A1            | -0.78 | Promotion of translation initiation                                                                      |
| <i>RPL15</i>                                                 | Ribosomal protein L15                                 | -0.85 | Pre-mRNA processing                                                                                      |
| <i>SRPK2</i>                                                 | SRSF protein kinase 2                                 | -0.85 | A component of the 60S subunit                                                                           |
| <i>THRA</i>                                                  | Thyroid hormone receptor, alpha                       | -0.87 | Regulation of splicing                                                                                   |
| <i>TRMT13</i>                                                | Trna methyltransferase 13 homolog (S. Cerevisiae)     | -0.99 | Receptor mediated signaling, transcription regulator                                                     |
| <i>NCBP2</i>                                                 | Nuclear cap binding protein subunit 2, 20kda          | -1.06 | Methylation of guanosine-4 in tRNAs                                                                      |
| <i>HNRPDL</i>                                                | Heterogeneous nuclear ribonucleoprotein D-like        | -1.08 | Nuclear cap-binding protein complex, mRNA capping                                                        |
| <i>EIF4B</i>                                                 | Eukaryotic translation initiation factor 4B           | -1.28 | RNA binding protein, pre-mRNA processing                                                                 |
| <b>e) Transcription regulators of innate immune response</b> |                                                       |       |                                                                                                          |
| <i>CREB5</i>                                                 | Camp responsive element binding protein 5             | 0.88  | Required for translation initiation                                                                      |
| <i>HMGB1</i>                                                 | High mobility group box 1                             | -0.68 | Activates transcription as a homodimer or a heterodimer with c-Jun or CRE-BP1                            |
| <i>HSPA9</i>                                                 | Heat shock 70kda protein 9 (mortalin)                 | -0.82 | Regulate gene expression, activate cell signaling through TLRs                                           |
| <i>CREB1</i>                                                 | Camp responsive element binding protein 1             | -0.84 | Protein folding, immune and stress response                                                              |
| <i>HSPA8</i>                                                 | Heat shock 70kda protein 8                            | -1.03 | TLR signaling, immune response, transcription, regulates FOS, CCND1, EGR1, etc.                          |
| <i>STAT4</i>                                                 | Signal transducer and activator of transcription 4    | -1.06 | Protein folding, immune and stress response                                                              |
| <i>JUN</i>                                                   | Jun proto-oncogene                                    | -1.11 | Signal transduction and transcription activation, mediates cytokine signaling                            |
| <i>FOS</i>                                                   | FBJ murine osteosarcoma viral oncogene homolog        | -1.60 | Component of the AP-1 transcription factor, innate immune response                                       |
| <b>f) Chromatin and DNA organization</b>                     |                                                       |       |                                                                                                          |
| <i>HMGN4</i>                                                 | High mobility group nucleosomal binding domain 4      | -0.55 | Component of transcriptional regulators, component of AP1 transcriptional factor, innate immune response |
| <i>HMGN1</i>                                                 | High mobility group nucleosome binding domain 1       | -0.61 | Chromatin-modifying enzyme                                                                               |
| <i>RAD17</i>                                                 | RAD17 homolog (S. Pombe)                              | -0.67 | Maintain an open chromatin configuration                                                                 |
| <i>NUDCD3</i>                                                | Nudc domain containing 3                              | -0.68 | Maintenance of chromosomal stability                                                                     |
| <i>PARP14</i>                                                | Poly (ADP-ribose) polymerase 1, member 14             | -0.76 | Dynein stabilization during mitosis                                                                      |
| <i>RPAP3</i>                                                 | RNA polymerase II associated protein 3                | -0.81 | DNA-dependent polyADP-ribosylation of nuclear proteins, regulates transcription                          |
| <i>NAP1L1</i>                                                | Nucleosome assembly protein 1-like 1                  | -0.90 | Regulation of histone phosphorylation and RNA pol assembly                                               |
|                                                              |                                                       |       | Nucleosome assembly protein                                                                              |

|               |                                                                                       |       |                                      |
|---------------|---------------------------------------------------------------------------------------|-------|--------------------------------------|
| <i>HDAC1</i>  | Histone deacetylase 1                                                                 | -1.15 | Positive regulation of transcription |
| <i>RCBTB2</i> | Regulator of chromosome condensation (RCC1) and BTB (POZ) domain containing protein 2 | -1.30 | Chromosome condensation              |

---

***Innate immunity, inflammatory response***

|               |                                                                              |       |                                                                                          |
|---------------|------------------------------------------------------------------------------|-------|------------------------------------------------------------------------------------------|
| <i>PTPRC</i>  | Protein tyrosine phosphatase, receptor type, C                               | 0.91  | Signaling molecule, regulator of T- and B-cell antigen receptor signaling                |
| <i>CD55</i>   | CD55 molecule, decay accelerating factor for complement (Cromer blood group) | 0.88  | Complement cascade                                                                       |
| <i>JAK3</i>   | Janus kinase 3                                                               | 0.71  | Cytokine receptor-mediated signal transduction                                           |
| <i>CLEC2D</i> | C-type lectin domain family 2, member D                                      | -0.66 | Regulation of NK-cell activity                                                           |
| <i>KLRK1</i>  | Killer cell lectin-like receptor subfamily K, member 1                       | -0.90 | Regulation of NK-cell activity                                                           |
| <i>KLRD1</i>  | Killer cell lectin-like receptor subfamily D, member 1                       | -0.96 | Regulation of NK-cell activity                                                           |
| <i>KLRC3</i>  | Killer cell lectin-like receptor subfamily C, Member 3                       | -0.98 | NK cell function                                                                         |
| <i>GZMK</i>   | Granzyme K (granzyme 3; tryptase II)                                         | -1.00 | NK- and CTL-mediated cell death                                                          |
| <i>D6</i>     | CD6 molecule                                                                 | -1.04 | Cell adhesion molecule involved in T-cell activation                                     |
| <i>TAGAP</i>  | T-cell activation rhoGTPase activating protein                               | -1.04 | GTPase-activating protein, T-cell activation                                             |
| <i>BTN3A1</i> | Butyrophilin, subfamily 3, member A1                                         | -1.05 | Production of Th1-cytokines                                                              |
| <i>CD160</i>  | CD160 molecule                                                               | -1.10 | Cytolysis of NK and T cells                                                              |
| <i>TPD52</i>  | Tumor protein D52                                                            | -1.11 | B cell differentiation                                                                   |
| <i>KLRF1</i>  | Killer cell lectin-like receptor subfamily F, member 1                       | -1.13 | Regulation of NK-cell activity                                                           |
| <i>CLEC7A</i> | C-type lectin domain family 7, member A                                      | -1.14 | TLR2-mediated inflammatory response                                                      |
| <i>KLRG1</i>  | Killer cell lectin-like receptor subfamily G, member 1                       | -1.16 | Regulation of NK-cell activity                                                           |
| <i>TRD@</i>   | T cell receptor delta locus                                                  | -1.16 | T-cell antigen receptor                                                                  |
| <i>SH2D1A</i> | SH2 domain containing 1A                                                     | -1.23 | Inhibitor of the signaling lymphocyte-activation molecule in activated T, B and NK cells |
| <i>GBP4</i>   | Guanylate binding protein 4                                                  | -1.38 | Mediator of cytokine signaling                                                           |
| <i>IL8</i>    | Interleukin 8                                                                | -2.16 | Chemotactic mediator of the inflammatory response                                        |

---

***Cell growth and proliferation, cellular organization***

|                  |                                                                                               |       |                                               |
|------------------|-----------------------------------------------------------------------------------------------|-------|-----------------------------------------------|
| <i>SPATA13</i>   | Spermatogenesis associated 13                                                                 | 1.28  | Regulation of Rho protein signal transduction |
| <i>IGF1R</i>     | Insulin-like growth factor 1 receptor                                                         | 1.15  | Cell growth and survival control              |
| <i>LRP10</i>     | Low density lipoprotein receptor-related protein 10                                           | 1.15  | Inhibitor of the Wnt/beta-catenin pathway     |
| <i>SSH1</i>      | Slingshot homolog 1 (Drosophila)                                                              | 1.08  | Regulation of actin dynamics                  |
| <i>PHIP</i>      | Pleckstrin homology domain interacting protein                                                | 1.03  | Stimulation of cell proliferation             |
| <i>TNFRSF10C</i> | Tumor necrosis factor receptor superfamily, member 10c, decoy without an intracellular domain | 0.88  | TRAIL decoy receptor                          |
| <i>NBEAL2</i>    | Neurobeachin-like 2                                                                           | 0.79  | Platelet formation                            |
| <i>AK3</i>       | Adenylate kinase 3                                                                            | -0.57 | Mitochondrial ADP biosynthesis                |
| <i>KIF2A</i>     | Kinesin heavy chain member 2A                                                                 | -0.58 | Mitotic progression                           |
| <i>VDAC3</i>     | Voltage-dependent anion channel 3                                                             | -0.60 | Mitochondrial porin family                    |
| <i>MTHFD1</i>    | Methylenetetrahydrofolate dehydrogenase                                                       | -0.62 | One-carbon metabolism                         |

|                             |                                                                                                       |       |                                                                                   |
|-----------------------------|-------------------------------------------------------------------------------------------------------|-------|-----------------------------------------------------------------------------------|
|                             | (NADP+ dependent) 1,<br>methenyltetrahydrofolate cyclohydrolase,<br>formyltetrahydrofolate synthetase |       |                                                                                   |
| <i>ADH5</i>                 | Alcohol dehydrogenase 5 (class III), chi polypeptide                                                  | -0.66 | Oxidation                                                                         |
| <i>NUB1</i>                 | Negative regulator of ubiquitin-like proteins 1                                                       | -0.67 | Regulator of proteasomal degradation                                              |
| <i>ST6GAL1</i>              | ST6 beta-galactosamide alpha-2,6-sialyltransferase 1                                                  | -0.68 | Glycosyltransferase                                                               |
| <i>SLC37A4</i>              | Solute carrier family 37 (glucose-6-phosphate transporter), member 4                                  | -0.69 | Glucose-6-phosphate transport                                                     |
| <i>CAPN7</i>                | Calpain 7                                                                                             | -0.70 | cell fusion and cell motility, protein degradation                                |
| <i>LPXN</i>                 | Leupaxin                                                                                              | -0.71 | Adaptor protein                                                                   |
| <i>AKAP11</i>               | A kinase (PRKA) anchor protein 11                                                                     | -0.72 | Cell cycle control                                                                |
| <i>AMD1</i>                 | Adenosylmethionine decarboxylase 1                                                                    | -0.72 | Polyamine biosynthesis, cellular proliferation                                    |
| <i>MAP3K4</i>               | Mitogen-activated protein kinase kinase kinase 4                                                      | -0.72 | MAPKKK activity                                                                   |
| <i>ACSL5</i>                | Acyl-coa synthetase long-chain family member 5                                                        | -0.74 | Lipid metabolism                                                                  |
| <i>DUSP5</i>                | Dual specificity phosphatase 5                                                                        | -0.74 | Negative regulator of cell proliferation, MAPK phosphatase                        |
| <i>DNAJC9</i>               | Dnaj (Hsp40) homolog, subfamily C, member 9                                                           | -0.75 | Protein folding                                                                   |
| <i>TPM1</i>                 | Tropomyosin 1 (alpha)                                                                                 | -0.77 | Stabilization of actin filaments                                                  |
| <i>MAPRE2</i>               | Microtubule-associated protein. Rp/eb family, member 2                                                | -0.81 | Proliferative control                                                             |
| <i>DDIT4</i>                | DNA-damage-inducible transcript 4                                                                     | -0.82 | Inhibition of cell proliferation                                                  |
| <i>ADSS</i>                 | Adenylosuccinate synthase                                                                             | -0.83 | Conversion of inosine monophosphate to adenosine monophosphate                    |
| <i>AGK</i>                  | Acylglycerol kinase                                                                                   | -0.85 | Lipid metabolism                                                                  |
| <i>ALDH1A1</i>              | Aldehyde dehydrogenase 1 family, member A1                                                            | -0.88 | Aldehyde metabolism, retinoic acid biosynthesis                                   |
| <i>INSIG1</i>               | Insulin induced gene 1                                                                                | -0.90 | Cell growth                                                                       |
| <i>BIN1</i>                 | Bridging integrator 1                                                                                 | -0.92 | Adaptor protein                                                                   |
| <i>PFKP</i>                 | Phosphofructokinase, platelet                                                                         | -0.92 | Glycolysis                                                                        |
| <i>THBS1</i>                | Thrombospondin 1                                                                                      | -0.94 | Cell-cell and cell-matrix interactions                                            |
| <i>GOLGA8A/<br/>GOLGA8B</i> | Golgin A8 family. Member B                                                                            | -0.95 | Maintainance of Golgi structure                                                   |
| <i>RCSD1</i>                | RCSD domain containing 1                                                                              | -1.00 | Actin filament assembly                                                           |
| <i>AQP3</i>                 | Aquaporin 3 (Gill blood group)                                                                        | -1.05 | Transport of small nonionic solutes                                               |
| <i>DUSP1</i>                | Dual specificity phosphatase 1                                                                        | -1.05 | Negative regulator of cell proliferation, MAPK phosphatase, interacts with Pol II |
| <i>BCL2</i>                 | B-cell CLL/lymphoma 2                                                                                 | -1.06 | Anti-apoptosis                                                                    |
| <i>CYB561</i>               | Cytochrome b-561                                                                                      | -1.07 | Electron transport protein                                                        |
| <i>STMN1</i>                | Stathmin 1                                                                                            | -1.09 | Destabilization of microtubules                                                   |
| <i>PDE4B</i>                | Phosphodiesterase 4B, camp-specific                                                                   | -1.20 | Signal transduction                                                               |
| <i>IFIT2</i>                | Interferon-induced protein with tetratricopeptide repeats 2                                           | -1.31 | Microtubule-associated protein                                                    |

---

### **Membrane functions**

#### **a) Lipid metabolism**

|               |                                 |       |                 |
|---------------|---------------------------------|-------|-----------------|
| <i>MTMR12</i> | Myotubularin related protein 12 | -0.73 | Adaptor protein |
|---------------|---------------------------------|-------|-----------------|



|                              |                                                                                 |       |                                                                                     |
|------------------------------|---------------------------------------------------------------------------------|-------|-------------------------------------------------------------------------------------|
| <i>PAQR8</i>                 | Progesterin and adipoQ receptor family member VIII                              | -0.90 | Steroid membrane receptor                                                           |
| <i>ATP8B2</i>                | ATPase, class I, type 8B, member 2                                              | -1.09 | Transport of phospholipids                                                          |
| <i>PLCG1</i>                 | Phospholipase C, gamma 1                                                        | -1.47 | Biosynthesis of DAG and IP3                                                         |
| <b>b) Ion transport</b>      |                                                                                 |       |                                                                                     |
| <i>CNNM3</i>                 | cyclin M3                                                                       | -0.73 | Metal transport                                                                     |
| <i>SGK1</i>                  | Serum/glucocorticoid regulated kinase 1                                         | -1.28 | Activator of ion channels                                                           |
| <b>c) Protein transport</b>  |                                                                                 |       |                                                                                     |
| <i>CYTH4</i>                 | Cytohesin 4                                                                     | 0.89  | Regulation of protein sorting and membrane trafficking                              |
| <i>SNTB2</i>                 | Syntrophin, beta 2 (dystrophin-associated protein A1, 59kDa, basic component 2) | 0.89  | Regulation of secretory granules                                                    |
| <i>TAP2</i>                  | Transporter 2. ATP-binding cassette. Sub-family B (MDR/TAP)                     | -0.60 | Membrane-associated protein, superfamily of ATP-binding cassette (ABC) transporters |
| <i>IPO5</i>                  | Importin 5                                                                      | -0.80 | Nuclear import of proteins                                                          |
| <i>SYTL2</i>                 | Synaptotagmin-like 2                                                            | -1.03 | Exocytosis                                                                          |
| <b>Ubiquitination</b>        |                                                                                 |       |                                                                                     |
| <i>VPRBP</i>                 | Vpr (HIV-1) binding protein                                                     | -0.63 | Adaptor protein to E3 ligase complexes                                              |
| <i>UBA2</i>                  | Ubiquitin-like modifier activating enzyme 2                                     | -0.67 | SUMO-activating enzyme for the sumoylation of proteins                              |
| <i>USP42</i>                 | Ubiquitin specific peptidase 42                                                 | -0.67 | Deubiquitinating enzyme                                                             |
| <i>DDB2</i>                  | Damage-specific DNA binding protein 2, 48kDa                                    | -0.76 | Ubiquitinylation of histone proteins, interacts with Pol II                         |
| <i>UBXN1</i>                 | UBX domain protein 1                                                            | -0.82 | Ubiquitin-binding protein                                                           |
| <b>G-protein signaling</b>   |                                                                                 |       |                                                                                     |
| <i>ARL11</i>                 | ADP-ribosylation factor-like 11                                                 | 0.71  | Stimulation of apoptosis, small GTPase superfamily member                           |
| <i>RABL2B</i>                | RAB, member of RAS oncogene family-like 2B                                      | -0.71 | Unknown, small GTPase superfamily member                                            |
| <i>RAPGEF6</i>               | Rap guanine nucleotide exchange factor (GEF) 6                                  | -0.78 | Ras protein signal transduction                                                     |
| <i>DOCK10</i>                | Dedicator of cytokinesis 10                                                     | -0.93 | Activator of Cdc42                                                                  |
| <i>CXCR4</i>                 | Chemokine (C-X-C motif) receptor 4                                              | -0.96 | Chemotaxis                                                                          |
| <i>ARHGEF3</i>               | Rho guanine nucleotide exchange factor (GEF) 3                                  | -0.99 | Acceleration of the GTPase activity of Rho GTPases                                  |
| <i>P2RY10</i>                | Purinergic receptor P2Y, G-protein coupled, 10                                  | -1.47 | Lysophospholipid receptor                                                           |
| <b>Pseudogens and others</b> |                                                                                 |       |                                                                                     |
| <i>PHF20L1</i>               | PHD finger protein 20-like 1                                                    | 1.24  | Unknown                                                                             |
| <i>FAM126B</i>               | Family with sequence similarity 126, member B                                   | 1.02  | Unknown                                                                             |
| <i>CASD1</i>                 | CAS1 domain containing 1                                                        | -0.53 | Membrane protein, putative glycosyltransferase                                      |
| <i>TSPYL4</i>                | TSPY-like 4                                                                     | -0.63 | Implicated in nucleosome assembly                                                   |
| <i>PADI2</i>                 | Peptidyl arginine deiminase. Type ii                                            | 0.67  | Deimination of arginine residues of proteins                                        |
| <i>DNAJC10</i>               | Dnaj (Hsp40) homolog, subfamily C, member 10                                    | -0.68 | Recognizing and degrading misfolded proteins                                        |
| <i>LANCL1</i>                | Lanc lantibiotic synthetase component C-like 1 (bacterial)                      | -0.68 | Implicated in peptide modification                                                  |
| <i>RMND5A</i>                | Required for meiotic nuclear division 5 homolog A ( <i>S. Cerevisiae</i> )      | -0.68 | Unknown                                                                             |
| <i>OXNAD1</i>                | Oxidoreductase NAD-binding domain                                               | -0.69 | Oxidoreductase activity                                                             |

|                 |                                                              |       |                                                 |
|-----------------|--------------------------------------------------------------|-------|-------------------------------------------------|
|                 | containing 1                                                 |       |                                                 |
| <i>CRY1</i>     | Cryptochrome 1 (photolyase-like)                             | -0.76 | Regulation of circadian cycle                   |
| <i>CTSC</i>     | Cathepsin C                                                  | -0.76 | Chaperone                                       |
| <i>MFNG</i>     | MFNG O-fucosylpeptide 3-beta-N-acetylglucosaminyltransferase | -0.76 | Positive regulation of Notch signaling pathway  |
| <i>BTN3A2</i>   | Butyrophilin, subfamily 3, member A2                         | -0.84 | Unknown, MHC-associated gene                    |
| <i>GLOD4</i>    | Glyoxalase domain containing 4                               | -0.91 | Implicated in suppression of cell growth        |
| <i>XPO7</i>     | Exportin 7                                                   | -0.93 | Nuclear export of proteins                      |
| <i>ECE1</i>     | Endothelin converting enzyme 1                               | 0.98  | Proteolytic processing of endothelin precursors |
| <i>MEI1</i>     | Meiosis inhibitor 1                                          | -0.98 | Meiotic chromosome synapsis                     |
| <i>SH3BGRL2</i> | SH3 domain binding glutamic acid-rich protein like 2         | -1.04 | Unknown                                         |
| <i>TJP2</i>     | Tight junction protein 2 (zona occludens 2)                  | -1.07 | Component of tight junction barrier             |
| <i>BTN3A3</i>   | Butyrophilin, subfamily 3, member A3                         | -1.08 | Unknown, MHC-associated gene                    |
| <i>PRSS23</i>   | Protease, serine, 23                                         | -1.17 | Unknown                                         |
| <i>SAMD3</i>    | Sterile alpha motif domain containing 3                      | -1.42 | Unknown                                         |

---

**Supplemental Table 2.** The networks of the genes regulated by *E. coli* 83972 in the patients.

| Associated network functions                                                                                   | Molecules in network                                                                                                                                                                                                                                                                                                                                                                 | Score | Regulated molecules |
|----------------------------------------------------------------------------------------------------------------|--------------------------------------------------------------------------------------------------------------------------------------------------------------------------------------------------------------------------------------------------------------------------------------------------------------------------------------------------------------------------------------|-------|---------------------|
| Drug Metabolism, Lipid Metabolism, Molecular Transport                                                         | AGK, ALDH1A1, Ap1, Ap2 alpha, AQP3, BIN1, CASD1, CD6, Ck2, CREB5, Creb, DUSP1, Dynamin, EIF4B, ERK1/2, estrogen receptor, F5, GRINA, HP, MAPK14, NAP1L1, NCOA4, NMDA Receptor, NUMB, PARP, PDE4B, PFKP, POR, Ppp2c, Rar, RETN, Rxr, Sapk, T3-TR-RXR, thyroid hormone receptor                                                                                                        | 40    | 20                  |
| Lipid Metabolism, Molecular Transport, Small Molecule Biochemistry                                             | ABCF1, ACSL5, ADH5 (includes EG:11532), ARL11, ATP8B2, AZI1, BTN3A1, CYB561, DNAJB11, DNAJC9, DNAJC19, DTNB, FBXO33, FNIP1, GFPT2, GLOD4, GMPPA, HSD17B10, IPO5, KIDINS220, KLHDC10, LANCL1, LOC100505603/PNRC2, LRP10, MTHFD1, MTMR12, NUDCD3, PLEKHA1, PQLC1, RNMT, SLC27A6, SNTB2, SRP19, STEAP3, UBC                                                                             | 33    | 17                  |
| Cell Death, Cell-To-Cell Signaling and Interaction, Cellular Development                                       | Angiotensin II receptor type 1, DDB2, DUSP5, EOMES, Fcer1, GAS7, GBP1, Glucocorticoid-GCR, Gm-csf, GZMK, HLA-DR, IFIT2, Ifn, IFN alpha/beta, IFN Beta, Ifn gamma, IFN TYPE 1, IL23, IL12 (complex), Interferon alpha, JINK1/2, JUN/JUNB/JUND, KLRD1, KLRG1, KLRK1, Laminin1, MHC Class I (complex), MHC CLASS I (family), NFkB (complex), NUB1, SLC37A4, STAT4, TJP2, Tlr, TNFRSF10C | 28    | 15                  |
| DNA Replication, Recombination, and Repair, Cell Cycle, Connective Tissue Development and Function             | 26s Proteasome, Actin, ADCY, CAND1, CD3, chemokine, CREB1, CRY1, FSH, GNRH, Gpcr, HISTONE, Histone h3, Histone h4, Hsp70, HSPA9, IKK (complex), IL12 (family), Jnk, JUN, Lh, MXD3, PARP1, Pka, Ras homolog, RNA polymerase II, RNMT, SGK1, SMC3, Tnf, TPM1 (includes EG:22003), TRRAP, Ubiquitin, Vegf, VPRBP                                                                        | 22    | 13                  |
| Cell-To-Cell Signaling and Interaction, Hematological System Development and Function, Immune Cell Trafficking | AK3, ARFGAP3, BTN3A1, BTN3A2, BTN3A3, CD48, CD160, CD276, CD200R1, Cd55/Daf2, CLEC2D, COL16A1, COL1A2, CYTH4, DYSF, ENTPD5, GPR65, H60a, HP, IFNG (includes EG:15978), IL2, KLRB1, LILRA2, MYD88, PLA2G7, PMP2 (includes EG:100334189), PRSS23, RABL2B, Raet1b, RFX2, Tlr11, Tlr12, Tlr13, TMEM50B, TNF                                                                              | 19    | 11                  |
| Hematological System Development and Function, Hematopoiesis, Humoral Immune Response                          | Akt, BCL2, BCL6, BCR (complex), Calcineurin A, Calcineurin protein(s), caspase, CXCR4, Cyclin A, DOCK10, F Actin, hCG, Hdac, Hsp90, Ige, IgG1, IgG, Igm, IL8, Immunoglobulin, JAK3, LBH, LPXN, MAP2K1/2, Mek, Nfat (family), Notch, PP2A, Rap1, RPAP3, SLC25A37, SSH1 (includes                                                                                                      | 19    | 12                  |

|                                                                                           |                                                                                                                                                                                                                                                                                                                                           |    |    |
|-------------------------------------------------------------------------------------------|-------------------------------------------------------------------------------------------------------------------------------------------------------------------------------------------------------------------------------------------------------------------------------------------------------------------------------------------|----|----|
| Cell Death,<br>Connective Tissue<br>Development and<br>Function, Embryonic<br>Development | EG:231637), ST6GAL1, Tgf beta, TSH<br>APC/APC2, Ca2+, CYSLTR1, FOS, FZD3, G<br>protein alpha, Gpcr, GPR19, GPR65,<br>GPR97, GPR137B, Gsk3, HMGN4, HNF4A,<br>Insulin, KLRF1, LPAR3, LPAR4, MRVI1,<br>NPS, NTSR1, OCM2, P2RY6, P2RY10, p85<br>(pik3r), PCNX, PLC, RBM6, SPATA13,<br>STAT, Stat dimer, SYTL2, TOR2A, TSPYL4,<br>ZNF146       | 17 | 10 |
| Cell Death,<br>Developmental<br>Disorder, Hereditary<br>Disorder                          | ADRB, Alp, ALPL, AMPK, calpain, Cdc2,<br>Collagen type I, Cytochrome c, DDIT4, ERK,<br>Fgf, Focal adhesion kinase, GBP4, Hsp27,<br>IL1, Integrin, LDL, MAP3K4, Mapk, NADPH<br>oxidase, NFAT (complex), P38 MAPK, Pdgf<br>(complex), PDGF BB, PI3K (complex),<br>Pkc(s), PLCG1, Rac, Ras, Rock, Sos, SRC<br>(family), STAT5a/b, TCR, THBS1 | 9  | 6  |

---

**Supplemental Table 3.** Transcriptional regulation by the ABU strain, *Escherichia coli* 83972.

| Symbol                                             | Entrez Gene Name                                                              | Log2 FC | Function                                                                                                         |
|----------------------------------------------------|-------------------------------------------------------------------------------|---------|------------------------------------------------------------------------------------------------------------------|
| <b>Transcriptional activators</b>                  |                                                                               |         |                                                                                                                  |
| <i>SOX4</i>                                        | SRY (sex determining region Y)-box 4                                          | 0.75    | Regulation of transcription, cell differentiation                                                                |
| <i>TFAP2A</i>                                      | Transcription factor AP-2 alpha (activating enhancer binding protein 2 alpha) | -0.59   | Transcription coactivator activity, transcription from RNA polymerase II promoter                                |
| <i>MN1</i>                                         | Meningioma (disrupted in balanced translocation) 1                            | -0.63   | Transcription, cell proliferation                                                                                |
| <i>CTNNB1</i>                                      | Catenin (cadherin-associated protein), beta 1, 88kDa                          | -0.73   | Transcription, regulation of calcium ion import                                                                  |
| <i>LHX1</i>                                        | LIM homeobox 1                                                                | -0.83   | RNA polymerase II transcription factor activity; regulation of transcription                                     |
| <i>OSR2</i>                                        | Odd-skipped related 2 (Drosophila)                                            | -0.85   | Cell proliferation; gene expression                                                                              |
| <i>EGR1*</i>                                       | Early growth response 1                                                       | -1.64   | Specific RNA polymerase II transcription factor activity, type I IFN signaling                                   |
| <i>LBH</i>                                         | Limb bud and heart development homolog (mouse)                                | -1.65   | AP1 transcription                                                                                                |
| <i>SNAI1*</i>                                      | Snail homolog 1 (Drosophila)                                                  | -2.23   | Positive and negative regulation of transcription; p53 induced SNAI degradation via MDM2-mediated ubiquitination |
| <b>Transcriptional repressors</b>                  |                                                                               |         |                                                                                                                  |
| <i>DACH1</i>                                       | Dachshund homolog 1 (Drosophila)                                              | 0.71    | Regulation of transcription from RNA polymerase II promoter                                                      |
| <i>BANP</i>                                        | BTG3 associated nuclear protein                                               | 0.63    | Transcription, cell cycle, negative regulation of p53, MDM2                                                      |
| <i>DDX20</i>                                       | DEAD (Asp-Glu-Ala-Asp) box polypeptide 20                                     | 0.59    | Transcription from RNA polymerase II promoter                                                                    |
| <i>MDM2</i>                                        | Mdm2 p53 binding protein homolog (mouse)                                      | -0.92   | Decreased expression after RNA polymerase II blocking, negative regulation of p53                                |
| <b>Zinc finger proteins, zinc-binding proteins</b> |                                                                               |         |                                                                                                                  |
| <i>ZNF451</i>                                      | Zinc finger protein 451                                                       | 1.30    | Regulation of transcription                                                                                      |
| <i>ZNF786</i>                                      | Zinc finger protein 786                                                       | 0.83    | Regulation of transcription                                                                                      |
| <i>ZBTB11</i>                                      | Zinc finger and BTB domain containing 11                                      | 0.81    | Regulation of transcription                                                                                      |
| <i>HERC2P2</i>                                     | Hect domain and RLD 2 pseudogene 2                                            | 0.68    | Zinc ion binding                                                                                                 |
| <i>BAZ2B</i>                                       | Bromodomain adjacent to zinc finger domain, 2B                                | 0.65    | Regulation of transcription                                                                                      |
| <i>D2HGDH</i>                                      | D-2-hydroxyglutarate dehydrogenase                                            | 0.62    | Response to zinc and cobalt; oxidation of D-2-hydroxyglutarate to alpha-ketoglutarate                            |
| <i>ZNF280C</i>                                     | Zinc finger protein 280C                                                      | 0.60    | Regulation of transcription                                                                                      |
| <i>ZFP112</i>                                      | Zinc finger protein 112 homolog (mouse)                                       | -0.59   | Regulation of transcription                                                                                      |
| <i>ZC3HAV1</i>                                     | Zinc finger CCCH-type, antiviral 1                                            | -1.26   | Protein amino acid ADP-ribosylation                                                                              |

|                                                                    |                                                                        |       |                                                                                                                                         |
|--------------------------------------------------------------------|------------------------------------------------------------------------|-------|-----------------------------------------------------------------------------------------------------------------------------------------|
| <i>FAM90A15</i>                                                    | Family with sequence similarity 90, member A15                         | -2.11 | Nucleic acid binding, zinc ion binding                                                                                                  |
| <b><i>Transcriptional and translational regulation</i></b>         |                                                                        |       |                                                                                                                                         |
| <i>EIF3CL</i>                                                      | Eukaryotic translation initiation factor 3, subunit C-like             | 1.51  | Translational initiation                                                                                                                |
| <i>VAR5</i>                                                        | Valyl-tRNA synthetase                                                  | 0.79  | Linking amino acids with nucleotide triplets contained in tRNAs, aminoacyl-tRNA synthetases                                             |
| <i>SNORD36C</i>                                                    | Small nucleolar RNA, C/D box 36C                                       | 0.69  | Biogenesis (modification) of other small nuclear RNAs (snRNAs), 2'-O-ribose methylation guide                                           |
| <i>PDCD4</i>                                                       | Programmed cell death 4 (neoplastic transformation inhibitor)          | 0.66  | Repression of AP-1 activity, inhibits translation initiation and cap-dependent translation                                              |
| <i>BRX1</i>                                                        | BRX1, biogenesis of ribosomes, homolog ( <i>S. cerevisiae</i> )        | 0.60  | Ribosomal biogenesis                                                                                                                    |
| <i>RN28S1</i>                                                      | RNA, 28S ribosomal 1                                                   | -0.67 | The portion of one rDNA repeat which encodes a 28S rRNA                                                                                 |
| <i>BTG2</i>                                                        | BTG family, member 2                                                   | -0.96 | DNA repair, positive regulation of nuclear-transcribed mRNA poly(A) tail shortening                                                     |
| <i>RPPH1</i>                                                       | Ribonuclease P RNA component H1                                        | -1.56 | A component of the RNase P ribonucleoprotein, involved in maturation of tRNA                                                            |
| <i>RN7SK</i>                                                       | RNA, 7SK small nuclear                                                 | -2.27 | Sequesters transcription elongation factor b P-TEFb                                                                                     |
| <i>RNU6ATAC</i>                                                    | RNA, U6atac small nuclear (U12-dependent splicing)                     | -4.14 | Pol III dependent gene, pre-mRNA splicing                                                                                               |
| <b><i>Transcriptional regulators of innate immune response</i></b> |                                                                        |       |                                                                                                                                         |
| <i>HES1*</i>                                                       | Hairy and enhancer of split 1, ( <i>Drosophila</i> )                   | -2.08 | Expression of the genes that require a bHLH protein for their transcription, cellular differentiation, sustains NF- $\kappa$ B activity |
| <i>FOSB</i>                                                        | FBJ murine osteosarcoma viral oncogene homolog B                       | -2.15 | Interacts with Jun proteins enhancing their DNA binding activity, innate immune response                                                |
| <i>FOS*</i>                                                        | FBJ murine osteosarcoma viral oncogene homolog                         | -2.56 | Form AP1 transcriptional factor with Jun proteins, innate immune response                                                               |
| <i>ID2*</i>                                                        | Inhibitor of DNA binding 2, dominant negative helix-loop-helix protein | -2.56 | Inhibition of basic helix-loop-helix transcription factors (HES1); transcription activator activity                                     |
| <i>ID1*</i>                                                        | Inhibitor of DNA binding 1, dominant negative helix-loop-helix protein | -3.17 | Inhibition of basic helix-loop-helix transcription factors (HES1); increases translocation of NF- $\kappa$ B p50                        |
| <i>HSPA6</i>                                                       | Heat shock 70kDa protein 6 (HSP70B')                                   | -4.26 | Protein folding, immune and stress response                                                                                             |
| <b><i>Chromatin and DNA organization</i></b>                       |                                                                        |       |                                                                                                                                         |
| <i>HIST2H2BE</i>                                                   | Histone cluster 2, H2be                                                | -0.66 | Nucleosome assembly; defense response to bacterium                                                                                      |
| <i>HIST1H2AC</i>                                                   | Histone cluster 1, H2ac                                                | -0.72 | Chromosome organization and biogenesis, nucleosome assembly                                                                             |

Note: \* - genes from common group, more suppressed by ABU ( $p < 0.05$ , two times lower than APN)

**Supplemental Table 4.** ABU specific genes, other functional groups.

| Symbol                                                             | Entrez Gene Name                                             | Log FC<br>ABU | Function                                                                                   |
|--------------------------------------------------------------------|--------------------------------------------------------------|---------------|--------------------------------------------------------------------------------------------|
| <b><i>Innate immunity, inflammatory response</i></b>               |                                                              |               |                                                                                            |
| <i>AKR1C2</i>                                                      | Aldo-keto reductase family 1, member C2                      | 1.50          | Prostaglandin metabolic process; steroid metabolic process; oxidation reduction            |
| <i>MAVS</i>                                                        | Mitochondrial antiviral signaling protein                    | 1.12          | JNK; IκB kinase/NFκB cascade; innate immune response                                       |
| <i>FGFBP1</i>                                                      | Fibroblast growth factor binding protein 1                   | -0.72         | Fibroblast growth factor receptor signaling pathway; regulation of MAPK                    |
| <i>ALOX5AP</i>                                                     | Arachidonate 5-lipoxygenase-activating protein               | -0.76         | Leukotriene production involved in inflammatory response; cellular response to calcium ion |
| <i>IFIT1</i>                                                       | Interferon-induced protein with tetratricopeptide repeats 1  | -0.73         | Type I interferon-mediated signaling pathway                                               |
| <i>NOD1</i>                                                        | Nucleotide-binding oligomerization domain containing 1       | -1.01         | Recognises bacterial diaminopimelic acid; initiates inflammatory response                  |
| <i>TLR5</i>                                                        | Toll-like receptor 5                                         | -1.03         | Recognizes bacterial flagellin; activates innate immune responses                          |
| <i>TNFRSF10D</i>                                                   | Tumor necrosis factor receptor superfamily, member 10d       | -1.59         | NFκB activation                                                                            |
| <b><i>Cell growth and proliferation, cellular organization</i></b> |                                                              |               |                                                                                            |
| <i>FILIP1L</i>                                                     | Filamin A interacting protein 1-like                         | 1.57          | Cell proliferation and migration                                                           |
| <i>DDX12</i>                                                       | DEAD/H (Asp-Glu-Ala-Asp/His) box polypeptide 12              | 1.54          | Cell proliferation, nucleic acid metabolic process                                         |
| <i>CYR61</i>                                                       | Cysteine-rich, angiogenic inducer, 61                        | 0.81          | Regulation of cell growth                                                                  |
| <i>STGC3</i>                                                       | Hypothetical STGC3                                           | 0.72          | Cell growth and regulation of the cell cycle                                               |
| <i>VANGL2</i>                                                      | Vang-like 2 (van gogh, Drosophila)                           | 0.72          | Planar cell polarity, apical protein localization                                          |
| <i>TPM2</i>                                                        | Tropomyosin 2 (beta)                                         | 0.64          | A member of the actin filament binding protein family, regulation of ATPase activity       |
| <i>MASTL</i>                                                       | Microtubule associated serine/threonine kinase-like          | 0.61          | Protein phosphorylation, prometaphase, spindle checkpoint, cytokinesis, mitosis, G2 phase  |
| <i>COBL</i>                                                        | Cordon-bleu homolog (mouse)                                  | -0.62         | The Actin-binding WH2 domain is found in 5 isoforms                                        |
| <i>CRIP1</i>                                                       | Cysteine-rich protein 1 (intestinal)                         | -0.72         | Zinc ion binding; cell proliferation                                                       |
| <i>PPFIBP1</i>                                                     | PTPRF interacting protein, binding protein 1 (liprin beta 1) | -0.96         | Cell adhesion, DNA integration                                                             |
| <i>FBN2</i>                                                        | Fibrillin 2                                                  | -1.55         | Extracellular matrix structural constituent, calcium ion binding                           |
| <i>GADD45G</i>                                                     | Growth arrest and DNA-damage-inducible, gamma                | -1.76         | MAPKKK activity                                                                            |
| <b><i>Membrane functions</i></b>                                   |                                                              |               |                                                                                            |
| <b>a) Lipid metabolism</b>                                         |                                                              |               |                                                                                            |
| <i>CYP26B1</i>                                                     | Cytochrome P450, family 26, subfamily B, polypeptide 1       | 1.00          | Synthesis of cholesterol, steroids and other lipids                                        |
| <i>MBOAT2</i>                                                      | Membrane bound O-acyltransferase domain containing           | 0.80          | Phospholipid biosynthetic process                                                          |

|                             |                                                                    |       |                                                                                                                           |
|-----------------------------|--------------------------------------------------------------------|-------|---------------------------------------------------------------------------------------------------------------------------|
| <i>CES2</i>                 | 2<br>Carboxylesterase 2 (intestine, liver)                         | 0.67  | Fatty acyl and cholesterol ester metabolism                                                                               |
| <i>PEMT</i>                 | Phosphatidylethanolamine N-methyltransferase                       | -0.68 | Conversion of phosphatidylethanolamine to phosphatidylcholine; positive regulation of lipoprotein metabolic process       |
| <b>b) Ion transport</b>     |                                                                    |       |                                                                                                                           |
| <i>KCNJ3</i>                | Potassium voltage-gated channel, subfamily G, member 3             | 0.99  | Potassium ion transport                                                                                                   |
| <i>TRPM8</i>                | Transient receptor potential cation channel, subfamily M, member 8 | -0.68 | Release of Ca <sup>2+</sup> from endoplasmic reticulum                                                                    |
| <b>c) Protein transport</b> |                                                                    |       |                                                                                                                           |
| <i>VAMP5</i>                | Vesicle-associated membrane protein 5 (myobrevin)                  | -0.60 | Vesicle docking during exocytosis, vesicle-mediated transport                                                             |
| <i>EXOC1</i>                | Exocyst complex component 1                                        | -0.61 | Exocytosis; protein transport                                                                                             |
| <i>FKBP9</i>                | FK506 binding protein 9, 63 kDa                                    | -0.63 | Protein folding                                                                                                           |
| <i>EMP1</i>                 | Epithelial membrane protein 1                                      | -1.06 | Regulates trafficking of surface proteins                                                                                 |
| <b>Ubiquitination</b>       |                                                                    |       |                                                                                                                           |
| <i>FBXO38</i>               | F-box protein 38                                                   | 0.92  | Ubiquitin cycle                                                                                                           |
| <i>SH3RF2</i>               | SH3 domain containing ring finger 2                                | 0.78  | Ubiquitin cycle                                                                                                           |
| <i>PELI2</i>                | Pellino homolog 2 (Drosophila)                                     | 0.63  | Polyubiquitination                                                                                                        |
| <i>UBE2E3</i>               | Ubiquitin-conjugating enzyme E2E 3 (UBC4/5 homolog, yeast)         | -0.71 | Ubiquitin-protein ligase activity                                                                                         |
| <i>UBC</i>                  | Ubiquitin C                                                        | -0.72 | Protein degradation, DNA repair, cell cycle regulation, kinase modification, endocytosis                                  |
| <i>MYLIP</i>                | Myosin regulatory light chain interacting protein                  | -1.23 | Protein ubiquitination involved in ubiquitin-dependent protein catabolic process                                          |
| <b>G-protein signaling</b>  |                                                                    |       |                                                                                                                           |
| <i>SIPA1L2</i>              | Signal-induced proliferation-associated 1 like 2                   | 1.00  | Regulation of small GTPase mediated signal transduction                                                                   |
| <i>SHOC2</i>                | Soc-2 suppressor of clear homolog (C. elegans)                     | 0.67  | Fibroblast growth factor receptor signaling pathway; Ras protein signal transduction                                      |
| <i>C6ORF170</i>             | Chromosome 6 open reading frame 170                                | 0.62  | Regulation of Rab GTPase activity                                                                                         |
| <i>BAIAP2</i>               | BAI1-associated protein 2                                          | -0.60 | Adaptor protein for membrane bound G-proteins; formation of stress fibers and cytokinesis                                 |
| <i>ARRDC3</i>               | Arrestin domain containing 3                                       | -0.62 | Transcription, activity of GPCRs                                                                                          |
| <i>EPHA4</i>                | EPH receptor A4                                                    | -0.65 | Protein amino acid phosphorylation; small GTPase Rho                                                                      |
| <i>FAM105A</i>              | Family with sequence similarity 105, member A                      | -0.71 | GTPase-activator protein (GAP) for Rho-like GTPases (hypothetical protein)                                                |
| <i>RGS4</i>                 | Regulator of G-protein signaling 4                                 | -0.74 | Inhibits signal transduction by increasing the GTPase activity of G protein alpha subunits, inactivation of MAPK activity |
| <i>RAB7B</i>                | RAB7B, member RAS oncogene family                                  | -1.25 | Small GTPase mediated signal transduction                                                                                 |
| <i>ARL4D</i>                | ADP-ribosylation factor-like 4D                                    | -1.32 | Protein secretion, small GTPase mediated signal transduction                                                              |



**Supplemental Table 5.** Commonly expressed genes in kidney epithelial cells (A498) after stimulation with the ABU strain, *Escherichia coli* 83972 and the APN strain, *Escherichia coli* CFT073.

| Symbol          | Entrez Gene Name                                                                                | CFT Log FC | ABU Log FC | CFT/ABU |
|-----------------|-------------------------------------------------------------------------------------------------|------------|------------|---------|
| <i>CSF2</i>     | colony stimulating factor 2 (granulocyte-macrophage)                                            | 7.105      | 6.431      | 1.10    |
| <i>CCL20</i>    | chemokine (C-C motif) ligand 20                                                                 | 5.894      | 5.481      | 1.08    |
| <i>PTX3</i>     | pentraxin 3, long                                                                               | 5.169      | 4.86       | 1.06    |
| <i>ICAM4</i>    | intercellular adhesion molecule 4 (Landsteiner-Wiener blood group)                              | 5.143      | 3.065      | 1.68    |
| <i>CCL2</i>     | chemokine (C-C motif) ligand 2                                                                  | 4.726      | 4.662      | 1.01    |
| <i>CXCL1</i>    | chemokine (C-X-C motif) ligand 1 (melanoma growth stimulating activity, alpha)                  | 4.715      | 5.073      | 0.93    |
| <i>IFNB1</i>    | interferon, beta 1, fibroblast                                                                  | 4.688      | 3.753      | 1.25    |
| <i>TRAF1</i>    | TNF receptor-associated factor 1                                                                | 4.674      | 4.02       | 1.16    |
| <i>MMP10</i>    | matrix metalloproteinase 10 (stromelysin 2)                                                     | 4.634      | 2.135      | 2.17    |
| <i>TNFAIP3</i>  | tumor necrosis factor, alpha-induced protein 3                                                  | 4.533      | 4.468      | 1.01    |
| <i>PTGS2</i>    | prostaglandin-endoperoxide synthase 2 (prostaglandin G/H synthase and cyclooxygenase)           | 4.456      | 3.113      | 1.43    |
| <i>IL8</i>      | interleukin 8                                                                                   | 4.403      | 4.352      | 1.01    |
| <i>OLR1</i>     | oxidized low density lipoprotein (lectin-like) receptor 1                                       | 4.31       | 3.019      | 1.43    |
| <i>CX3CL1</i>   | chemokine (C-X3-C motif) ligand 1                                                               | 4.105      | 3.309      | 1.24    |
| <i>IL6</i>      | interleukin 6 (interferon, beta 2)                                                              | 4.087      | 3.952      | 1.03    |
| <i>LTB</i>      | lymphotoxin beta (TNF superfamily, member 3)                                                    | 4.083      | 4.095      | 1.00    |
| <i>CXCL10</i>   | chemokine (C-X-C motif) ligand 10                                                               | 4.004      | 3.429      | 1.17    |
| <i>UBD</i>      | ubiquitin D                                                                                     | 3.823      | 2.691      | 1.42    |
| <i>PPAP2B</i>   | phosphatidic acid phosphatase type 2B                                                           | 3.704      | 3          | 1.23    |
| <i>CHAC1</i>    | ChaC, cation transport regulator homolog 1 (E. coli)                                            | 3.65       | 3.564      | 1.02    |
| <i>VCAM1</i>    | vascular cell adhesion molecule 1                                                               | 3.648      | 3.669      | 0.99    |
| <i>LIF</i>      | leukemia inhibitory factor (cholinergic differentiation factor)                                 | 3.631      | 3.178      | 1.14    |
| <i>SOD2</i>     | superoxide dismutase 2, mitochondrial                                                           | 3.628      | 2.914      | 1.25    |
| <i>CXCL2</i>    | chemokine (C-X-C motif) ligand 2                                                                | 3.615      | 3.851      | 0.94    |
| <i>G0S2</i>     | G0/G1 switch 2                                                                                  | 3.535      | 3.316      | 1.07    |
| <i>BDKRB1</i>   | bradykinin receptor B1                                                                          | 3.531      | 2.862      | 1.23    |
| <i>HBEGF</i>    | heparin-binding EGF-like growth factor                                                          | 3.499      | 2.036      | 1.72    |
| <i>RNF144B</i>  | ring finger protein 144B                                                                        | 3.425      | 3.047      | 1.12    |
| <i>IL1B</i>     | interleukin 1, beta                                                                             | 3.412      | 2.508      | 1.36    |
| <i>ICAM1</i>    | intercellular adhesion molecule 1                                                               | 3.3        | 2.668      | 1.24    |
| <i>BPGM</i>     | 2,3-bisphosphoglycerate mutase                                                                  | 3.279      | 3.148      | 1.04    |
| <i>MAFF</i>     | v-maf musculoaponeurotic fibrosarcoma oncogene homolog F (avian)                                | 3.279      | 2.589      | 1.27    |
| <i>IRAK2</i>    | interleukin-1 receptor-associated kinase 2                                                      | 3.256      | 2.763      | 1.18    |
| <i>C15ORF48</i> | chromosome 15 open reading frame 48                                                             | 3.253      | 1.797      | 1.81    |
| <i>IRF1</i>     | interferon regulatory factor 1                                                                  | 3.244      | 2.76       | 1.18    |
| <i>NECAB1</i>   | N-terminal EF-hand calcium binding protein 1                                                    | 3.211      | 1.923      | 1.67    |
| <i>NEDD9</i>    | neural precursor cell expressed, developmentally down-regulated 9                               | 3.172      | 3.526      | 0.90    |
| <i>RASGRP3</i>  | RAS guanyl releasing protein 3 (calcium and DAG-regulated)                                      | 3.166      | 0.996      | 3.18    |
| <i>CLDN1</i>    | claudin 1                                                                                       | 3.15       | 2.861      | 1.10    |
| <i>SLC26A9</i>  | solute carrier family 26, member 9                                                              | 3.139      | 2.748      | 1.14    |
| <i>PDGFB</i>    | platelet-derived growth factor beta polypeptide (simian sarcoma viral (v-sis) oncogene homolog) | 3.074      | 2.417      | 1.27    |
| <i>TNF</i>      | tumor necrosis factor                                                                           | 3.073      | 3.603      | 0.85    |

|                  |                                                                                               |       |       |      |
|------------------|-----------------------------------------------------------------------------------------------|-------|-------|------|
| <i>TNFAIP2</i>   | tumor necrosis factor, alpha-induced protein 2                                                | 3.064 | 2.495 | 1.23 |
| <i>BIRC3</i>     | baculoviral IAP repeat-containing 3                                                           | 3.062 | 3.019 | 1.01 |
| <i>AQP9</i>      | aquaporin 9                                                                                   | 2.993 | 1.807 | 1.66 |
| <i>IL1A</i>      | interleukin 1, alpha                                                                          | 2.989 | 2.849 | 1.05 |
| <i>GCH1</i>      | GTP cyclohydrolase 1                                                                          | 2.952 | 1.457 | 2.03 |
| <i>ABTB2</i>     | ankyrin repeat and BTB (POZ) domain containing 2                                              | 2.91  | 1.681 | 1.73 |
| <i>NFKBIA</i>    | nuclear factor of kappa light polypeptide gene enhancer in B-cells inhibitor, alpha           | 2.904 | 2.812 | 1.03 |
| <i>C6ORF58</i>   | chromosome 6 open reading frame 58                                                            | 2.901 | 2.99  | 0.97 |
| <i>NRG1</i>      | neuregulin 1                                                                                  | 2.9   | 2.351 | 1.23 |
| <i>SLCO5A1</i>   | solute carrier organic anion transporter family, member 5A1                                   | 2.864 | 0.882 | 3.25 |
| <i>NFKBIE</i>    | nuclear factor of kappa light polypeptide gene enhancer in B-cells inhibitor, epsilon         | 2.859 | 2.41  | 1.19 |
| <i>EGR2</i>      | early growth response 2                                                                       | 2.838 | 2.74  | 1.04 |
| <i>SESN2</i>     | sestrin 2                                                                                     | 2.836 | 2.396 | 1.18 |
| <i>MMP3</i>      | matrix metalloproteinase 3 (stromelysin 1, progelatinase)                                     | 2.822 | 1.12  | 2.52 |
| <i>KIAA0247</i>  | KIAA0247                                                                                      | 2.817 | 2.038 | 1.38 |
| <i>LINCR</i>     | neuralized homolog 3 (Drosophila) pseudogene                                                  | 2.804 | 1.314 | 2.13 |
| <i>XAF1</i>      | XIAP associated factor 1                                                                      | 2.804 | 1.88  | 1.49 |
| <i>SPRY4</i>     | sprouty homolog 4 (Drosophila)                                                                | 2.777 | 2.208 | 1.26 |
| <i>SAMD4A</i>    | sterile alpha motif domain containing 4A                                                      | 2.752 | 1.191 | 2.31 |
| <i>PIM3</i>      | pim-3 oncogene                                                                                | 2.742 | 1.833 | 1.50 |
| <i>ADORA2A</i>   | adenosine A2a receptor                                                                        | 2.705 | 1.749 | 1.55 |
| <i>TNFRSF9</i>   | tumor necrosis factor receptor superfamily, member 9                                          | 2.704 | 2.122 | 1.27 |
| <i>TUBE1</i>     | tubulin, epsilon 1                                                                            | 2.687 | 2.496 | 1.08 |
| <i>ETS1</i>      | v-ets erythroblastosis virus E26 oncogene homolog 1 (avian)                                   | 2.681 | 1.83  | 1.47 |
| <i>NUAK2</i>     | NUAK family, SNF1-like kinase, 2                                                              | 2.677 | 2.63  | 1.02 |
| <i>RCAN1</i>     | regulator of calcineurin 1                                                                    | 2.629 | 1.523 | 1.73 |
| <i>STX11</i>     | syntaxin 11                                                                                   | 2.624 | 1.539 | 1.71 |
| <i>GDF15</i>     | growth differentiation factor 15                                                              | 2.6   | 2.858 | 0.91 |
| <i>ZEB2</i>      | zinc finger E-box binding homeobox 2                                                          | 2.526 | 2.147 | 1.18 |
| <i>KRT86</i>     | keratin 86                                                                                    | 2.516 | 1.079 | 2.33 |
| <i>PGM2L1</i>    | phosphoglucomutase 2-like 1                                                                   | 2.448 | 0.942 | 2.60 |
| <i>RASEF</i>     | RAS and EF-hand domain containing                                                             | 2.427 | 1.586 | 1.53 |
| <i>ECM2</i>      | extracellular matrix protein 2, female organ and adipocyte specific                           | 2.421 | 1.74  | 1.39 |
| <i>ICOSLG</i>    | inducible T-cell co-stimulator ligand                                                         | 2.412 | 1.668 | 1.45 |
| <i>STC2</i>      | stanniocalcin 2                                                                               | 2.409 | 2.158 | 1.12 |
| <i>RELB</i>      | v-rel reticuloendotheliosis viral oncogene homolog B                                          | 2.4   | 1.791 | 1.34 |
| <i>LOC644242</i> | hypothetical LOC644242                                                                        | 2.386 | 1.664 | 1.43 |
| <i>C12ORF59</i>  | chromosome 12 open reading frame 59                                                           | 2.373 | 1.934 | 1.23 |
| <i>ADAMTS9</i>   | ADAM metalloproteinase with thrombospondin type 1 motif, 9                                    | 2.369 | 1.229 | 1.93 |
| <i>TIFA</i>      | TRAF-interacting protein with forkhead-associated domain                                      | 2.364 | 2.73  | 0.87 |
| <i>PLEKHG1</i>   | pleckstrin homology domain containing, family G (with RhoGef domain) member 1                 | 2.358 | 1.53  | 1.54 |
| <i>HIVEP1</i>    | human immunodeficiency virus type I enhancer binding protein 1                                | 2.357 | 1.987 | 1.19 |
| <i>HDAC9</i>     | histone deacetylase 9                                                                         | 2.353 | 1.624 | 1.45 |
| <i>SERPINE1</i>  | serpin peptidase inhibitor, clade E (nexin, plasminogen activator inhibitor type 1), member 1 | 2.335 | 1.299 | 1.80 |
| <i>ADM2</i>      | adrenomedullin 2                                                                              | 2.325 | 2.014 | 1.15 |
| <i>SLC1A4</i>    | solute carrier family 1 (glutamate/neutral amino acid transporter), member 4                  | 2.323 | 2.051 | 1.13 |

|                                  |                                                                                                           |       |       |      |
|----------------------------------|-----------------------------------------------------------------------------------------------------------|-------|-------|------|
| <i>MAP3K8</i>                    | mitogen-activated protein kinase kinase kinase 8                                                          | 2.316 | 1.148 | 2.02 |
| <i>IL12A</i>                     | interleukin 12A (natural killer cell stimulatory factor 1, cytotoxic lymphocyte maturation factor 1, p35) | 2.307 | 1.855 | 1.24 |
| <i>PPP3CC</i>                    | protein phosphatase 3, catalytic subunit, gamma isozyme                                                   | 2.284 | 1.63  | 1.40 |
| <i>IL4I1</i>                     | interleukin 4 induced 1                                                                                   | 2.275 | 1.887 | 1.21 |
| <i>NCOA7</i>                     | nuclear receptor coactivator 7                                                                            | 2.275 | 2.164 | 1.05 |
| <i>RND3</i>                      | Rho family GTPase 3                                                                                       | 2.274 | 1.952 | 1.16 |
| <i>CTH</i>                       | cystathionase (cystathionine gamma-lyase)                                                                 | 2.264 | 1.791 | 1.26 |
| <i>ZC3H12A</i>                   | zinc finger CCCH-type containing 12A                                                                      | 2.253 | 1.978 | 1.14 |
| <i>SLFN5</i>                     | schlafen family member 5                                                                                  | 2.251 | 1.428 | 1.58 |
| <i>SLC2A6</i>                    | solute carrier family 2 (facilitated glucose transporter), member 6                                       | 2.246 | 1.654 | 1.36 |
| <i>NFKB2</i>                     | nuclear factor of kappa light polypeptide gene enhancer in B-cells 2 (p49/p100)                           | 2.239 | 1.623 | 1.38 |
| <i>STYK1</i>                     | serine/threonine/tyrosine kinase 1                                                                        | 2.238 | 2.146 | 1.04 |
| <i>SLC39A14</i>                  | solute carrier family 39 (zinc transporter), member 14                                                    | 2.232 | 1.532 | 1.46 |
| <i>KRT75</i>                     | keratin 75                                                                                                | 2.223 | 0.848 | 2.62 |
| <i>PPP1R15B</i>                  | protein phosphatase 1, regulatory (inhibitor) subunit 15B                                                 | 2.223 | 1.887 | 1.18 |
| <i>CCL5</i>                      | chemokine (C-C motif) ligand 5                                                                            | 2.222 | 0.891 | 2.49 |
| <i>DKFZP686O24166</i>            | hypothetical protein DKFZp686O24166                                                                       | 2.21  | 1.098 | 2.01 |
| <i>KLF6</i>                      | Kruppel-like factor 6                                                                                     | 2.209 | 1.978 | 1.12 |
| <i>GBP4 (includes EG:115361)</i> | guanylate binding protein 4                                                                               | 2.198 | 0.658 | 3.34 |
| <i>IER3</i>                      | immediate early response 3                                                                                | 2.193 | 2.411 | 0.91 |
| <i>SERTAD2</i>                   | SERTA domain containing 2                                                                                 | 2.188 | 1.479 | 1.48 |
| <i>USP54</i>                     | ubiquitin specific peptidase 54                                                                           | 2.174 | 2.038 | 1.07 |
| <i>MSC</i>                       | musculin                                                                                                  | 2.168 | 2.08  | 1.04 |
| <i>TNFAIP8</i>                   | tumor necrosis factor, alpha-induced protein 8                                                            | 2.162 | 1.578 | 1.37 |
| <i>DAAM1</i>                     | dishevelled associated activator of morphogenesis 1                                                       | 2.153 | 1.337 | 1.61 |
| <i>CD83</i>                      | CD83 molecule                                                                                             | 2.151 | 1.502 | 1.43 |
| <i>FUT4</i>                      | fucosyltransferase 4 (alpha (1,3) fucosyltransferase, myeloid-specific)                                   | 2.14  | 1.663 | 1.29 |
| <i>ATF3</i>                      | activating transcription factor 3                                                                         | 2.137 | 1.271 | 1.68 |
| <i>CD274</i>                     | CD274 molecule                                                                                            | 2.113 | 1.313 | 1.61 |
| <i>CEBPD</i>                     | CCAAT/enhancer binding protein (C/EBP), delta                                                             | 2.104 | 2.294 | 0.92 |
| <i>BDKRB2</i>                    | bradykinin receptor B2                                                                                    | 2.099 | 1.901 | 1.10 |
| <i>CREB5</i>                     | cAMP responsive element binding protein 5                                                                 | 2.071 | 1.401 | 1.48 |
| <i>IFNAR2</i>                    | interferon (alpha, beta and omega) receptor 2                                                             | 2.066 | 1.819 | 1.14 |
| <i>STK40</i>                     | serine/threonine kinase 40                                                                                | 2.063 | 1.453 | 1.42 |
| <i>IFNGR2</i>                    | interferon gamma receptor 2 (interferon gamma transducer 1)                                               | 2.062 | 1.402 | 1.47 |
| <i>PIM1</i>                      | pim-1 oncogene                                                                                            | 2.061 | 1.957 | 1.05 |
| <i>FLJ46906</i>                  | hypothetical protein LOC441172                                                                            | 2.046 | 1.296 | 1.58 |
| <i>AKAP2</i>                     | A kinase (PRKA) anchor protein 2                                                                          | 2.042 | 1.061 | 1.92 |
| <i>PHLDB2</i>                    | pleckstrin homology-like domain, family B, member 2                                                       | 2.042 | 1.257 | 1.62 |
| <i>FOXO1</i>                     | forkhead box O1                                                                                           | 2.041 | 1.7   | 1.20 |
| <i>PPP1R15A</i>                  | protein phosphatase 1, regulatory (inhibitor) subunit 15A                                                 | 2.039 | 1.401 | 1.46 |
| <i>FLJ27255</i>                  | hypothetical LOC401281                                                                                    | 2.025 | 1.042 | 1.94 |
| <i>ABL2</i>                      | v-abl Abelson murine leukemia viral oncogene homolog 2                                                    | 2.023 | 2.143 | 0.94 |
| <i>ATP2B1</i>                    | ATPase, Ca <sup>++</sup> transporting, plasma membrane 1                                                  | 2.022 | 1.096 | 1.84 |
| <i>SLC7A2</i>                    | solute carrier family 7 (cationic amino acid transporter, y+ system), member 2                            | 2.012 | 0.692 | 2.91 |
| <i>C10ORF47</i>                  | chromosome 10 open reading frame 47                                                                       | 2.003 | 1.46  | 1.37 |
| <i>GFPT2</i>                     | glutamine-fructose-6-phosphate transaminase 2                                                             | 2.002 | 1.128 | 1.77 |
| <i>IFNGR1</i>                    | interferon gamma receptor 1                                                                               | 2.001 | 2.063 | 0.97 |

|                  |                                                                                                      |       |       |      |
|------------------|------------------------------------------------------------------------------------------------------|-------|-------|------|
| <i>PRIC285</i>   | peroxisomal proliferator-activated receptor A interacting complex 285                                | 1.997 | 0.94  | 2.12 |
| <i>JUB</i>       | jub, ajuba homolog ( <i>Xenopus laevis</i> )                                                         | 1.994 | 1.995 | 1.00 |
| <i>LARP6</i>     | La ribonucleoprotein domain family, member 6                                                         | 1.994 | 1.793 | 1.11 |
| <i>EPHA2</i>     | EPH receptor A2                                                                                      | 1.99  | 1.461 | 1.36 |
| <i>CCDC93</i>    | coiled-coil domain containing 93                                                                     | 1.983 | 1.423 | 1.39 |
| <i>ST3GAL1</i>   | ST3 beta-galactoside alpha-2,3-sialyltransferase 1                                                   | 1.971 | 1.159 | 1.70 |
| <i>RIPK2</i>     | receptor-interacting serine-threonine kinase 2                                                       | 1.969 | 1.807 | 1.09 |
| <i>LAD1</i>      | ladinin 1                                                                                            | 1.966 | 1.233 | 1.59 |
| <i>SOCS2</i>     | suppressor of cytokine signaling 2                                                                   | 1.956 | 1.507 | 1.30 |
| <i>PLD6</i>      | phospholipase D family, member 6                                                                     | 1.955 | 1.238 | 1.58 |
| <i>PPTC7</i>     | PTC7 protein phosphatase homolog ( <i>S. cerevisiae</i> )                                            | 1.947 | 1.442 | 1.35 |
| <i>TRIM36</i>    | tripartite motif-containing 36                                                                       | 1.946 | 1.17  | 1.66 |
| <i>PMAIP1</i>    | phorbol-12-myristate-13-acetate-induced protein 1                                                    | 1.944 | 1.668 | 1.17 |
| <i>RPA4</i>      | replication protein A4, 30kDa                                                                        | 1.938 | 1.564 | 1.24 |
| <i>CEBPG</i>     | CCAAT/enhancer binding protein (C/EBP), gamma                                                        | 1.927 | 1.694 | 1.14 |
| <i>MTHFD2</i>    | methylenetetrahydrofolate dehydrogenase (NADP+ dependent) 2, methenyltetrahydrofolate cyclohydrolase | 1.926 | 1.543 | 1.25 |
| <i>ITPKA</i>     | inositol 1,4,5-trisphosphate 3-kinase A                                                              | 1.925 | 1.1   | 1.75 |
| <i>NFKB1</i>     | nuclear factor of kappa light polypeptide gene enhancer in B-cells 1                                 | 1.924 | 1.269 | 1.52 |
| <i>PDXDC2</i>    | pyridoxal-dependent decarboxylase domain containing 2, pseudogene                                    | 1.919 | 2.048 | 0.94 |
| <i>WTAP</i>      | Wilms tumor 1 associated protein                                                                     | 1.917 | 1.383 | 1.39 |
| <i>ASNS</i>      | asparagine synthetase (glutamine-hydrolyzing)                                                        | 1.911 | 1.603 | 1.19 |
| <i>CD55</i>      | CD55 molecule, decay accelerating factor for complement (Cromer blood group)                         | 1.906 | 0.728 | 2.62 |
| <i>MX1</i>       | myxovirus (influenza virus) resistance 1, interferon-inducible protein p78 (mouse)                   | 1.901 | 0.591 | 3.22 |
| <i>VDR</i>       | vitamin D (1,25- dihydroxyvitamin D3) receptor                                                       | 1.896 | 1.037 | 1.83 |
| <i>PRO0628</i>   | hypothetical LOC29053                                                                                | 1.895 | 1.952 | 0.97 |
| <i>TRIB3</i>     | tribbles homolog 3 ( <i>Drosophila</i> )                                                             | 1.894 | 1.542 | 1.23 |
| <i>NFKBIZ</i>    | nuclear factor of kappa light polypeptide gene enhancer in B-cells inhibitor, zeta                   | 1.884 | 1.89  | 1.00 |
| <i>ITPRIP</i>    | inositol 1,4,5-triphosphate receptor interacting protein                                             | 1.874 | 1.379 | 1.36 |
| <i>B3GNT5</i>    | UDP-GlcNAc:betaGal beta-1,3-N-acetylglucosaminyltransferase 5                                        | 1.87  | 1.617 | 1.16 |
| <i>EFNA1</i>     | ephrin-A1                                                                                            | 1.862 | 1.431 | 1.30 |
| <i>IL15RA</i>    | interleukin 15 receptor, alpha                                                                       | 1.856 | 0.816 | 2.27 |
| <i>FAS</i>       | Fas (TNF receptor superfamily, member 6)                                                             | 1.85  | 1.41  | 1.31 |
| <i>TNIP1</i>     | TNFAIP3 interacting protein 1                                                                        | 1.848 | 1.276 | 1.45 |
| <i>ASAM</i>      | adipocyte-specific adhesion molecule                                                                 | 1.845 | 1.777 | 1.04 |
| <i>AHR</i>       | aryl hydrocarbon receptor                                                                            | 1.841 | 1.688 | 1.09 |
| <i>ZNFX1</i>     | zinc finger, NFX1-type containing 1                                                                  | 1.833 | 1.006 | 1.82 |
| <i>DUSP10</i>    | dual specificity phosphatase 10                                                                      | 1.831 | 2.113 | 0.87 |
| <i>DUSP8</i>     | dual specificity phosphatase 8                                                                       | 1.827 | 2.604 | 0.70 |
| <i>RGMB</i>      | RGM domain family, member B                                                                          | 1.826 | 1.398 | 1.31 |
| <i>SAT1</i>      | spermidine/spermine N1-acetyltransferase 1                                                           | 1.814 | 1.437 | 1.26 |
| <i>RNF19B</i>    | ring finger protein 19B                                                                              | 1.799 | 0.896 | 2.01 |
| <i>TSC22D1</i>   | TSC22 domain family, member 1                                                                        | 1.787 | 1.48  | 1.21 |
| <i>ZSWIM4</i>    | zinc finger, SWIM-type containing 4                                                                  | 1.787 | 1.718 | 1.04 |
| <i>LMO4</i>      | LIM domain only 4                                                                                    | 1.784 | 1.43  | 1.25 |
| <i>PCK2</i>      | phosphoenolpyruvate carboxykinase 2 (mitochondrial)                                                  | 1.783 | 1.44  | 1.24 |
| <i>LOC285216</i> | hypothetical protein LOC285216                                                                       | 1.777 | 1.476 | 1.20 |
| <i>SMOX</i>      | spermine oxidase                                                                                     | 1.775 | 1.297 | 1.37 |
| <i>C17ORF68</i>  | chromosome 17 open reading frame 68                                                                  | 1.765 | 1.514 | 1.17 |

|                                |                                                                                   |       |       |      |
|--------------------------------|-----------------------------------------------------------------------------------|-------|-------|------|
| <i>JUNB</i>                    | jun B proto-oncogene                                                              | 1.763 | 1.325 | 1.33 |
| <i>TNFRSF10B</i>               | tumor necrosis factor receptor superfamily, member 10b                            | 1.763 | 1.44  | 1.22 |
| <i>P2RY2</i>                   | purinergic receptor P2Y, G-protein coupled, 2                                     | 1.76  | 1.208 | 1.46 |
| <i>LRRC49</i>                  | leucine rich repeat containing 49                                                 | 1.756 | 1.28  | 1.37 |
| <i>BMP2</i>                    | bone morphogenetic protein 2                                                      | 1.737 | 0.997 | 1.74 |
| <i>SLC4A7</i>                  | solute carrier family 4, sodium bicarbonate cotransporter, member 7               | 1.735 | 1.222 | 1.42 |
| <i>LRP12</i>                   | low density lipoprotein receptor-related protein 12                               | 1.733 | 1.184 | 1.46 |
| <i>ZBTB10</i>                  | zinc finger and BTB domain containing 10                                          | 1.733 | 1.379 | 1.26 |
| <i>EHD1</i>                    | EH-domain containing 1                                                            | 1.732 | 0.655 | 2.64 |
| <i>ELL2</i>                    | elongation factor, RNA polymerase II, 2                                           | 1.732 | 0.92  | 1.88 |
| <i>CFB</i>                     | complement factor B                                                               | 1.73  | 1.059 | 1.63 |
| <i>C7ORF40</i>                 | chromosome 7 open reading frame 40                                                | 1.728 | 1.497 | 1.15 |
| <i>GBP1 (includes EG:2633)</i> | guanylate binding protein 1, interferon-inducible, 67kDa                          | 1.725 | 0.959 | 1.80 |
| <i>MXD1</i>                    | MAX dimerization protein 1                                                        | 1.72  | 0.967 | 1.78 |
| <i>KLF5</i>                    | Kruppel-like factor 5 (intestinal)                                                | 1.71  | 0.96  | 1.78 |
| <i>TRAF4</i>                   | TNF receptor-associated factor 4                                                  | 1.704 | 1.245 | 1.37 |
| <i>FRMD6</i>                   | FERM domain containing 6                                                          | 1.696 | 1.065 | 1.59 |
| <i>DDIT3</i>                   | DNA-damage-inducible transcript 3                                                 | 1.686 | 1.598 | 1.06 |
| <i>NUP43</i>                   | nucleoporin 43kDa                                                                 | 1.686 | 2.315 | 0.73 |
| <i>CITED4</i>                  | Cbp/p300-interacting transactivator, with Glu/Asp-rich carboxy-terminal domain, 4 | 1.685 | 1.735 | 0.97 |
| <i>FGD6</i>                    | FYVE, RhoGEF and PH domain containing 6                                           | 1.685 | 1.446 | 1.17 |
| <i>BIRC2</i>                   | baculoviral IAP repeat-containing 2                                               | 1.678 | 1.312 | 1.28 |
| <i>CDC42EP2</i>                | CDC42 effector protein (Rho GTPase binding) 2                                     | 1.676 | 1.552 | 1.08 |
| <i>LACTB</i>                   | lactamase, beta                                                                   | 1.663 | 1.219 | 1.36 |
| <i>CYLD</i>                    | cylindromatosis (turban tumor syndrome)                                           | 1.659 | 1.049 | 1.58 |
| <i>ACHE</i>                    | acetylcholinesterase                                                              | 1.651 | 0.746 | 2.21 |
| <i>C9ORF72</i>                 | chromosome 9 open reading frame 72                                                | 1.647 | 1.786 | 0.92 |
| <i>ASB6</i>                    | ankyrin repeat and SOCS box-containing 6                                          | 1.645 | 1.132 | 1.45 |
| <i>PBX4</i>                    | pre-B-cell leukemia homeobox 4                                                    | 1.641 | 1.159 | 1.42 |
| <i>TRIB1</i>                   | tribbles homolog 1 (Drosophila)                                                   | 1.636 | 1.68  | 0.97 |
| <i>GABARAPL1</i>               | GABA(A) receptor-associated protein like 1                                        | 1.634 | 1.27  | 1.29 |
| <i>GEM</i>                     | GTP binding protein overexpressed in skeletal muscle                              | 1.627 | 1.128 | 1.44 |
| <i>CCRN4L</i>                  | CCR4 carbon catabolite repression 4-like (S. cerevisiae)                          | 1.625 | 1.409 | 1.15 |
| <i>SLC41A1</i>                 | solute carrier family 41, member 1                                                | 1.623 | 1.079 | 1.50 |
| <i>C3ORF52</i>                 | chromosome 3 open reading frame 52                                                | 1.622 | 0.956 | 1.70 |
| <i>C6ORF150</i>                | chromosome 6 open reading frame 150                                               | 1.621 | 1.614 | 1.00 |
| <i>CXCR7</i>                   | chemokine (C-X-C motif) receptor 7                                                | 1.616 | 1.112 | 1.45 |
| <i>DUSP1</i>                   | dual specificity phosphatase 1                                                    | 1.616 | 1.715 | 0.94 |
| <i>ARL5B</i>                   | ADP-ribosylation factor-like 5B                                                   | 1.613 | 0.697 | 2.31 |
| <i>GPRC5A</i>                  | G protein-coupled receptor, family C, group 5, member A                           | 1.609 | 0.808 | 1.99 |
| <i>TNFAIP6</i>                 | tumor necrosis factor, alpha-induced protein 6                                    | 1.608 | 1.264 | 1.27 |
| <i>PXK</i>                     | PX domain containing serine/threonine kinase                                      | 1.607 | 1.695 | 0.95 |
| <i>TMEM217</i>                 | transmembrane protein 217                                                         | 1.606 | 0.753 | 2.13 |
| <i>CHIC2</i>                   | cysteine-rich hydrophobic domain 2                                                | 1.604 | 1.038 | 1.55 |
| <i>DUSP5</i>                   | dual specificity phosphatase 5                                                    | 1.602 | 1.452 | 1.10 |
| <i>CYTH1</i>                   | cytohesin 1                                                                       | 1.597 | 0.792 | 2.02 |
| <i>MFHAS1</i>                  | malignant fibrous histiocytoma amplified sequence 1                               | 1.594 | 1.018 | 1.57 |
| <i>SERPINA1</i>                | serpin peptidase inhibitor, clade A (alpha-1 antitrypsin), member 1               | 1.594 | 0.952 | 1.67 |
| <i>ELOVL7</i>                  | ELOVL family member 7, elongation of long chain fatty acids (yeast)               | 1.588 | 0.643 | 2.47 |
| <i>GTPBP2</i>                  | GTP binding protein 2                                                             | 1.58  | 1.442 | 1.10 |
| <i>ZFP42</i>                   | zinc finger protein 42 homolog (mouse)                                            | 1.58  | 1.475 | 1.07 |

|                  |                                                                               |       |       |      |
|------------------|-------------------------------------------------------------------------------|-------|-------|------|
| <i>IFNE</i>      | interferon, epsilon                                                           | 1.578 | 1.521 | 1.04 |
| <i>PPP1R14C</i>  | protein phosphatase 1, regulatory (inhibitor) subunit 14C                     | 1.576 | 0.746 | 2.11 |
| <i>VEGFA</i>     | vascular endothelial growth factor A                                          | 1.576 | 1.409 | 1.12 |
| <i>RELA</i>      | v-rel reticuloendotheliosis viral oncogene homolog A (avian)                  | 1.575 | 1.088 | 1.45 |
| <i>GLIS3</i>     | GLIS family zinc finger 3                                                     | 1.563 | 0.906 | 1.73 |
| <i>SDC4</i>      | syndecan 4                                                                    | 1.561 | 0.931 | 1.68 |
| <i>USP53</i>     | ubiquitin specific peptidase 53                                               | 1.561 | 0.851 | 1.83 |
| <i>TRMT2B</i>    | TRM2 tRNA methyltransferase 2 homolog B (S. cerevisiae)                       | 1.559 | 1.707 | 0.91 |
| <i>SHB</i>       | Src homology 2 domain containing adaptor protein B                            | 1.558 | 0.907 | 1.72 |
| <i>PISD</i>      | phosphatidylserine decarboxylase                                              | 1.552 | 1.274 | 1.22 |
| <i>BCL3</i>      | B-cell CLL/lymphoma 3                                                         | 1.548 | 1.31  | 1.18 |
| <i>DCLRE1B</i>   | DNA cross-link repair 1B                                                      | 1.547 | 1.086 | 1.42 |
| <i>CLIP2</i>     | CAP-GLY domain containing linker protein 2                                    | 1.546 | 0.601 | 2.57 |
| <i>RBMS1</i>     | RNA binding motif, single stranded interacting protein 1                      | 1.54  | 1.252 | 1.23 |
| <i>SLC22A4</i>   | solute carrier family 22 (organic cation/ergothioneine transporter), member 4 | 1.54  | 0.698 | 2.21 |
| <i>ALOXE3</i>    | arachidonate lipoxygenase 3                                                   | 1.537 | 0.753 | 2.04 |
| <i>CBX4</i>      | chromobox homolog 4                                                           | 1.536 | 0.88  | 1.75 |
| <i>GRPEL2</i>    | GrpE-like 2, mitochondrial (E. coli)                                          | 1.536 | 1.488 | 1.03 |
| <i>MBNL2</i>     | muscleblind-like 2 (Drosophila)                                               | 1.534 | 0.977 | 1.57 |
| <i>MAFG</i>      | v-maf musculoaponeurotic fibrosarcoma oncogene homolog G (avian)              | 1.533 | 1.088 | 1.41 |
| <i>NAV3</i>      | neuron navigator 3                                                            | 1.52  | 0.857 | 1.77 |
| <i>C1QTNF1</i>   | C1q and tumor necrosis factor related protein 1                               | 1.513 | 0.888 | 1.70 |
| <i>ARSJ</i>      | arylsulfatase family, member J                                                | 1.504 | 0.956 | 1.57 |
| <i>ZBTB46</i>    | zinc finger and BTB domain containing 46                                      | 1.504 | 1.106 | 1.36 |
| <i>MESDC1</i>    | mesoderm development candidate 1                                              | 1.498 | 1.263 | 1.19 |
| <i>TGFB2</i>     | transforming growth factor, beta 2                                            | 1.497 | 0.895 | 1.67 |
| <i>TNFRSF10A</i> | tumor necrosis factor receptor superfamily, member 10a                        | 1.496 | 1.067 | 1.40 |
| <i>CYP26A1</i>   | cytochrome P450, family 26, subfamily A, polypeptide 1                        | 1.495 | 1.064 | 1.41 |
| <i>KIF21B</i>    | kinesin family member 21B                                                     | 1.495 | 1.136 | 1.32 |
| <i>A4GALT</i>    | alpha 1,4-galactosyltransferase                                               | 1.494 | 1.112 | 1.34 |
| <i>GADD45A</i>   | growth arrest and DNA-damage-inducible, alpha                                 | 1.493 | 1.688 | 0.88 |
| <i>HKDC1</i>     | hexokinase domain containing 1                                                | 1.482 | 1.151 | 1.29 |
| <i>GPT2</i>      | glutamic pyruvate transaminase (alanine aminotransferase) 2                   | 1.48  | 1.46  | 1.01 |
| <i>LONRF3</i>    | LON peptidase N-terminal domain and ring finger 3                             | 1.478 | 0.917 | 1.61 |
| <i>SLC38A2</i>   | solute carrier family 38, member 2                                            | 1.478 | 1.451 | 1.02 |
| <i>DGKI</i>      | diacylglycerol kinase, iota                                                   | 1.476 | 0.868 | 1.70 |
| <i>REPS2</i>     | RALBP1 associated Eps domain containing 2                                     | 1.476 | 0.823 | 1.79 |
| <i>RAB9A</i>     | RAB9A, member RAS oncogene family                                             | 1.473 | 1.18  | 1.25 |
| <i>GOLGA7B</i>   | golgin A7 family, member B                                                    | 1.457 | 0.692 | 2.11 |
| <i>RAPH1</i>     | Ras association (RalGDS/AF-6) and pleckstrin homology domains 1               | 1.457 | 0.843 | 1.73 |
| <i>DUSP16</i>    | dual specificity phosphatase 16                                               | 1.452 | 1.514 | 0.96 |
| <i>ZBTB17</i>    | zinc finger and BTB domain containing 17                                      | 1.449 | 1.133 | 1.28 |
| <i>C3ORF59</i>   | chromosome 3 open reading frame 59                                            | 1.448 | 0.99  | 1.46 |
| <i>URGCP</i>     | upregulator of cell proliferation                                             | 1.448 | 1.239 | 1.17 |
| <i>CDV3</i>      | CDV3 homolog (mouse)                                                          | 1.447 | 0.908 | 1.59 |
| <i>PRKCD</i>     | protein kinase C, delta                                                       | 1.445 | 0.803 | 1.80 |
| <i>CDK6</i>      | cyclin-dependent kinase 6                                                     | 1.439 | 0.775 | 1.86 |
| <i>NAV2</i>      | neuron navigator 2                                                            | 1.438 | 0.702 | 2.05 |
| <i>KLF9</i>      | Kruppel-like factor 9                                                         | 1.435 | 1.021 | 1.41 |
| <i>PSAT1</i>     | phosphoserine aminotransferase 1                                              | 1.435 | 1.187 | 1.21 |

|                                 |                                                                                |       |       |      |
|---------------------------------|--------------------------------------------------------------------------------|-------|-------|------|
| <i>TPM1</i>                     | tropomyosin 1 (alpha)                                                          | 1.435 | 2.269 | 0.63 |
| <i>JMY</i>                      | junction mediating and regulatory protein, p53 cofactor                        | 1.433 | 1.138 | 1.26 |
| <i>AFAP1</i>                    | actin filament associated protein 1                                            | 1.43  | 0.812 | 1.76 |
| <i>DKFZP434K191</i>             | POM121 membrane glycoprotein-like 8 pseudogene                                 | 1.427 | 1.332 | 1.07 |
| <i>FAM84B</i>                   | family with sequence similarity 84, member B                                   | 1.426 | 0.961 | 1.48 |
| <i>KYNU</i>                     | kynureninase (L-kynurenine hydrolase)                                          | 1.422 | 1.041 | 1.37 |
| <i>PKDCC</i>                    | protein kinase domain containing, cytoplasmic homolog (mouse)                  | 1.421 | 1.064 | 1.34 |
| <i>DTX2</i>                     | deltex homolog 2 (Drosophila)                                                  | 1.42  | 1.126 | 1.26 |
| <i>STK10</i>                    | serine/threonine kinase 10                                                     | 1.417 | 0.678 | 2.09 |
| <i>NUPR1</i>                    | nuclear protein, transcriptional regulator, 1                                  | 1.415 | 1.216 | 1.16 |
| <i>ZNF295</i>                   | zinc finger protein 295                                                        | 1.415 | 1.355 | 1.04 |
| <i>SLC7A1</i>                   | solute carrier family 7 (cationic amino acid transporter, y+ system), member 1 | 1.409 | 0.889 | 1.58 |
| <i>NCEH1</i>                    | neutral cholesterol ester hydrolase 1                                          | 1.405 | 0.915 | 1.54 |
| <i>NUAK1</i>                    | NUAK family, SNF1-like kinase, 1                                               | 1.405 | 0.909 | 1.55 |
| <i>IL7R</i>                     | interleukin 7 receptor                                                         | 1.404 | 0.933 | 1.50 |
| <i>RBBP9</i>                    | retinoblastoma binding protein 9                                               | 1.404 | 1.319 | 1.06 |
| <i>PHC2</i>                     | polyhomeotic homolog 2 (Drosophila)                                            | 1.399 | 0.956 | 1.46 |
| <i>SH2D5</i>                    | SH2 domain containing 5                                                        | 1.394 | 0.63  | 2.21 |
| <i>TNIP3</i>                    | TNFAIP3 interacting protein 3                                                  | 1.393 | 1.385 | 1.01 |
| <i>CLCF1</i>                    | cardiotrophin-like cytokine factor 1                                           | 1.392 | 1.086 | 1.28 |
| <i>FLJ40448</i>                 | hypothetical protein FLJ40448                                                  | 1.391 | 0.827 | 1.68 |
| <i>IFNAR1</i>                   | interferon (alpha, beta and omega) receptor 1                                  | 1.391 | 1.017 | 1.37 |
| <i>CDC42EP3</i>                 | CDC42 effector protein (Rho GTPase binding) 3                                  | 1.39  | 0.674 | 2.06 |
| <i>FCF1 (includes EG:51077)</i> | FCF1 small subunit (SSU) processome component homolog ( <i>S. cerevisiae</i> ) | 1.384 | 1.454 | 0.95 |
| <i>GJC1</i>                     | gap junction protein, gamma 1, 45kDa                                           | 1.384 | 0.994 | 1.39 |
| <i>ITGAM</i>                    | integrin, alpha M (complement component 3 receptor 3 subunit)                  | 1.381 | 1.017 | 1.36 |
| <i>SMAD3</i>                    | SMAD family member 3                                                           | 1.379 | 1.086 | 1.27 |
| <i>STARD13</i>                  | StAR-related lipid transfer (START) domain containing 13                       | 1.375 | 1.459 | 0.94 |
| <i>CARS</i>                     | cysteinyl-tRNA synthetase                                                      | 1.366 | 1.008 | 1.36 |
| <i>LRRC8C</i>                   | leucine rich repeat containing 8 family, member C                              | 1.366 | 0.61  | 2.24 |
| <i>HAS3</i>                     | hyaluronan synthase 3                                                          | 1.364 | 0.617 | 2.21 |
| <i>CSGALNACT2</i>               | chondroitin sulfate N-acetylgalactosaminyltransferase 2                        | 1.359 | 0.62  | 2.19 |
| <i>SPEN</i>                     | spen homolog, transcriptional regulator (Drosophila)                           | 1.357 | 0.949 | 1.43 |
| <i>PRICKLE3</i>                 | prickle homolog 3 (Drosophila)                                                 | 1.355 | 0.945 | 1.43 |
| <i>TBC1D10A</i>                 | TBC1 domain family, member 10A                                                 | 1.352 | 1.072 | 1.26 |
| <i>FOSL1</i>                    | FOS-like antigen 1                                                             | 1.351 | 1.013 | 1.33 |
| <i>H6PD</i>                     | hexose-6-phosphate dehydrogenase (glucose 1-dehydrogenase)                     | 1.351 | 0.833 | 1.62 |
| <i>SLC41A2</i>                  | solute carrier family 41, member 2                                             | 1.349 | 0.705 | 1.91 |
| <i>TTC39B</i>                   | tetratricopeptide repeat domain 39B                                            | 1.344 | 0.951 | 1.41 |
| <i>VEGFC</i>                    | vascular endothelial growth factor C                                           | 1.342 | 0.887 | 1.51 |
| <i>RAB24</i>                    | RAB24, member RAS oncogene family                                              | 1.333 | 0.73  | 1.83 |
| <i>NIPA1</i>                    | non imprinted in Prader-Willi/Angelman syndrome 1                              | 1.329 | 0.914 | 1.45 |
| <i>ARHGAP42</i>                 | Rho GTPase activating protein 42                                               | 1.323 | 0.773 | 1.71 |
| <i>IL15</i>                     | interleukin 15                                                                 | 1.318 | 0.748 | 1.76 |
| <i>SOCS3</i>                    | suppressor of cytokine signaling 3                                             | 1.318 | 0.616 | 2.14 |
| <i>IFRD1</i>                    | interferon-related developmental regulator 1                                   | 1.317 | 0.932 | 1.41 |
| <i>RGPD6</i>                    | RANBP2-like and GRIP domain containing 6                                       | 1.317 | 1.816 | 0.73 |
| <i>TICAM1</i>                   | toll-like receptor adaptor molecule 1                                          | 1.306 | 1.128 | 1.16 |
| <i>PVR</i>                      | poliovirus receptor                                                            | 1.304 | 0.847 | 1.54 |
| <i>CYTH2</i>                    | cytohesin 2                                                                    | 1.303 | 0.915 | 1.42 |
| <i>TRIM47</i>                   | tripartite motif-containing 47                                                 | 1.302 | 0.681 | 1.91 |

|                  |                                                                                                                          |       |       |      |
|------------------|--------------------------------------------------------------------------------------------------------------------------|-------|-------|------|
| <i>FSTL3</i>     | follistatin-like 3 (secreted glycoprotein)                                                                               | 1.294 | 0.62  | 2.09 |
| <i>KCTD13</i>    | potassium channel tetramerisation domain containing 13                                                                   | 1.294 | 0.973 | 1.33 |
| <i>OGT</i>       | O-linked N-acetylglucosamine (GlcNAc) transferase (UDP-N-acetylglucosamine:polypeptide-N-acetylglucosaminyl transferase) | 1.294 | 1.016 | 1.27 |
| <i>SLC22A23</i>  | solute carrier family 22, member 23                                                                                      | 1.294 | 0.708 | 1.83 |
| <i>SPSB1</i>     | splA/ryanodine receptor domain and SOCS box containing 1                                                                 | 1.291 | 0.619 | 2.09 |
| <i>USP12</i>     | ubiquitin specific peptidase 12                                                                                          | 1.286 | 0.604 | 2.13 |
| <i>GABPB1</i>    | GA binding protein transcription factor, beta subunit 1                                                                  | 1.285 | 0.687 | 1.87 |
| <i>GOLGA8G</i>   | golgin A8 family, member G                                                                                               | 1.282 | 1.182 | 1.08 |
| <i>LOC441124</i> | hypothetical gene supported by AK093729; BX647918                                                                        | 1.281 | 1.079 | 1.19 |
| <i>BHLHE41</i>   | basic helix-loop-helix family, member e41                                                                                | 1.276 | 0.613 | 2.08 |
| <i>C3</i>        | complement component 3                                                                                                   | 1.275 | 1.12  | 1.14 |
| <i>FUBP3</i>     | far upstream element (FUSE) binding protein 3                                                                            | 1.273 | 1.295 | 0.98 |
| <i>PTGER4</i>    | prostaglandin E receptor 4 (subtype EP4)                                                                                 | 1.273 | 1.294 | 0.98 |
| <i>CEBPB</i>     | CCAAT/enhancer binding protein (C/EBP), beta                                                                             | 1.272 | 1.238 | 1.03 |
| <i>F3</i>        | coagulation factor III (thromboplastin, tissue factor)                                                                   | 1.272 | 1.467 | 0.87 |
| <i>PPARD</i>     | peroxisome proliferator-activated receptor delta                                                                         | 1.272 | 0.874 | 1.46 |
| <i>HSPBAP1</i>   | HSPB (heat shock 27kDa) associated protein 1                                                                             | 1.264 | 0.88  | 1.44 |
| <i>PPAN</i>      | peter pan homolog (Drosophila)                                                                                           | 1.264 | 1.065 | 1.19 |
| <i>FJX1</i>      | four jointed box 1 (Drosophila)                                                                                          | 1.263 | 0.873 | 1.45 |
| <i>BAZ1A</i>     | bromodomain adjacent to zinc finger domain, 1A                                                                           | 1.257 | 0.922 | 1.36 |
| <i>CDC14A</i>    | CDC14 cell division cycle 14 homolog A ( <i>S. cerevisiae</i> )                                                          | 1.253 | 1.133 | 1.11 |
| <i>TNKS1BP1</i>  | tankyrase 1 binding protein 1, 182kDa                                                                                    | 1.248 | 0.81  | 1.54 |
| <i>SOX9</i>      | SRY (sex determining region Y)-box 9                                                                                     | 1.247 | 1.031 | 1.21 |
| <i>TNIP2</i>     | TNFAIP3 interacting protein 2                                                                                            | 1.246 | 0.972 | 1.28 |
| <i>WWC1</i>      | WW and C2 domain containing 1                                                                                            | 1.246 | 0.751 | 1.66 |
| <i>LONRF1</i>    | LON peptidase N-terminal domain and ring finger 1                                                                        | 1.244 | 1.106 | 1.12 |
| <i>NAB1</i>      | NGFI-A binding protein 1 (EGR1 binding protein 1)                                                                        | 1.243 | 0.867 | 1.43 |
| <i>TMEM156</i>   | transmembrane protein 156                                                                                                | 1.243 | 0.84  | 1.48 |
| <i>TNFRSF12A</i> | tumor necrosis factor receptor superfamily, member 12A                                                                   | 1.241 | 0.804 | 1.54 |
| <i>UBTD2</i>     | ubiquitin domain containing 2                                                                                            | 1.241 | 0.739 | 1.68 |
| <i>ZXDA</i>      | zinc finger, X-linked, duplicated A                                                                                      | 1.24  | 1.507 | 0.82 |
| <i>ELK4</i>      | ELK4, ETS-domain protein (SRF accessory protein 1)                                                                       | 1.238 | 0.908 | 1.36 |
| <i>MARS</i>      | methionyl-tRNA synthetase                                                                                                | 1.237 | 0.965 | 1.28 |
| <i>MYO3B</i>     | myosin IIIB                                                                                                              | 1.233 | 1.586 | 0.78 |
| <i>ZMIZ2</i>     | zinc finger, MIZ-type containing 2                                                                                       | 1.233 | 0.862 | 1.43 |
| <i>PPP1R3F</i>   | protein phosphatase 1, regulatory (inhibitor) subunit 3F                                                                 | 1.23  | 0.774 | 1.59 |
| <i>OTUD4</i>     | OTU domain containing 4                                                                                                  | 1.228 | 0.711 | 1.73 |
| <i>DDX21</i>     | DEAD (Asp-Glu-Ala-Asp) box polypeptide 21                                                                                | 1.227 | 0.928 | 1.32 |
| <i>DDX10</i>     | DEAD (Asp-Glu-Ala-Asp) box polypeptide 10                                                                                | 1.225 | 1.048 | 1.17 |
| <i>TNFAIP1</i>   | tumor necrosis factor, alpha-induced protein 1 (endothelial)                                                             | 1.225 | 0.743 | 1.65 |
| <i>SUPV3L1</i>   | suppressor of var1, 3-like 1 ( <i>S. cerevisiae</i> )                                                                    | 1.221 | 0.997 | 1.22 |
| <i>JUND</i>      | jun D proto-oncogene                                                                                                     | 1.22  | 1.086 | 1.12 |
| <i>CFLAR</i>     | CASP8 and FADD-like apoptosis regulator                                                                                  | 1.218 | 1.035 | 1.18 |
| <i>GSG1L</i>     | GSG1-like                                                                                                                | 1.218 | 0.997 | 1.22 |
| <i>GPR125</i>    | G protein-coupled receptor 125                                                                                           | 1.216 | 1.55  | 0.78 |
| <i>CYB5R2</i>    | cytochrome b5 reductase 2                                                                                                | 1.215 | 0.792 | 1.53 |
| <i>AGPHD1</i>    | aminoglycoside phosphotransferase domain containing 1                                                                    | 1.214 | 1.574 | 0.77 |
| <i>SBNO2</i>     | strawberry notch homolog 2 ( <i>Drosophila</i> )                                                                         | 1.209 | 0.896 | 1.35 |
| <i>TPRA1</i>     | transmembrane protein, adipocyte associated 1                                                                            | 1.209 | 0.605 | 2.00 |
| <i>FAM129A</i>   | family with sequence similarity 129, member A                                                                            | 1.207 | 0.595 | 2.03 |
| <i>LOC387895</i> | hypothetical LOC387895                                                                                                   | 1.207 | 0.65  | 1.86 |
| <i>SH2B3</i>     | SH2B adaptor protein 3                                                                                                   | 1.205 | 0.617 | 1.95 |



|                  |                                                                                   |       |       |      |
|------------------|-----------------------------------------------------------------------------------|-------|-------|------|
| <i>ELF4</i>      | E74-like factor 4 (ets domain transcription factor)                               | 1.204 | 0.688 | 1.75 |
| <i>GOLGA8F</i>   | golgin A8 family, member F                                                        | 1.204 | 1.158 | 1.04 |
| <i>RFFL</i>      | ring finger and FYVE-like domain containing 1                                     | 1.204 | 1.014 | 1.19 |
| <i>STK17A</i>    | serine/threonine kinase 17a                                                       | 1.198 | 1.252 | 0.96 |
| <i>SLC25A22</i>  | solute carrier family 25 (mitochondrial carrier: glutamate), member 22            | 1.196 | 0.612 | 1.95 |
| <i>E2F7</i>      | E2F transcription factor 7                                                        | 1.195 | 0.725 | 1.65 |
| <i>APOL6</i>     | apolipoprotein L, 6                                                               | 1.193 | 0.838 | 1.42 |
| <i>CPEB2</i>     | cytoplasmic polyadenylation element binding protein 2                             | 1.192 | 0.916 | 1.30 |
| <i>RFTN1</i>     | raftlin, lipid raft linker 1                                                      | 1.189 | 0.666 | 1.79 |
| <i>C9ORF150</i>  | chromosome 9 open reading frame 150                                               | 1.185 | 1.29  | 0.92 |
| <i>HRH1</i>      | histamine receptor H1                                                             | 1.183 | 0.762 | 1.55 |
| <i>TRIM8</i>     | tripartite motif-containing 8                                                     | 1.18  | 0.855 | 1.38 |
| <i>DDIT4</i>     | DNA-damage-inducible transcript 4                                                 | 1.179 | 1.248 | 0.94 |
| <i>IL18BP</i>    | interleukin 18 binding protein                                                    | 1.179 | 0.629 | 1.87 |
| <i>AKR1B15</i>   | aldo-keto reductase family 1, member B15                                          | 1.178 | 1.11  | 1.06 |
| <i>ALPK2</i>     | alpha-kinase 2                                                                    | 1.177 | 0.666 | 1.77 |
| <i>ROR1</i>      | receptor tyrosine kinase-like orphan receptor 1                                   | 1.175 | 0.653 | 1.80 |
| <i>ZFP36</i>     | zinc finger protein 36, C3H type, homolog (mouse)                                 | 1.175 | 0.629 | 1.87 |
| <i>INF2</i>      | inverted formin, FH2 and WH2 domain containing                                    | 1.173 | 1.05  | 1.12 |
| <i>TRIO</i>      | triple functional domain (PTPRF interacting)                                      | 1.171 | 0.61  | 1.92 |
| <i>ARID5A</i>    | AT rich interactive domain 5A (MRF1-like)                                         | 1.17  | 0.92  | 1.27 |
| <i>GNB4</i>      | guanine nucleotide binding protein (G protein), beta polypeptide 4                | 1.169 | 1.05  | 1.11 |
| <i>PHLDA1</i>    | pleckstrin homology-like domain, family A, member 1                               | 1.167 | 1.35  | 0.86 |
| <i>ZNF609</i>    | zinc finger protein 609                                                           | 1.165 | 1.195 | 0.97 |
| <i>CBS</i>       | cystathionine-beta-synthase                                                       | 1.159 | 0.789 | 1.47 |
| <i>RBBP8</i>     | retinoblastoma binding protein 8                                                  | 1.159 | 0.778 | 1.49 |
| <i>FAM65A</i>    | family with sequence similarity 65, member A                                      | 1.158 | 0.756 | 1.53 |
| <i>GOPC</i>      | golgi-associated PDZ and coiled-coil motif containing                             | 1.156 | 1.223 | 0.95 |
| <i>ZNF296</i>    | zinc finger protein 296                                                           | 1.153 | 0.67  | 1.72 |
| <i>PPIF</i>      | peptidylprolyl isomerase F                                                        | 1.152 | 0.742 | 1.55 |
| <i>NOC3L</i>     | nucleolar complex associated 3 homolog (S. cerevisiae)                            | 1.149 | 0.591 | 1.94 |
| <i>ENGASE</i>    | endo-beta-N-acetylglucosaminidase                                                 | 1.148 | 1.046 | 1.10 |
| <i>MOBK12C</i>   | MOB1, Mps One Binder kinase activator-like 2C (yeast)                             | 1.148 | 0.605 | 1.90 |
| <i>TRIM56</i>    | tripartite motif-containing 56                                                    | 1.146 | 0.596 | 1.92 |
| <i>CREB1</i>     | cAMP responsive element binding protein 1                                         | 1.144 | 1.116 | 1.03 |
| <i>SLC6A9</i>    | solute carrier family 6 (neurotransmitter transporter, glycine), member 9         | 1.143 | 0.779 | 1.47 |
| <i>MGC2752</i>   | hypothetical LOC65996                                                             | 1.141 | 1.142 | 1.00 |
| <i>GRB7</i>      | growth factor receptor-bound protein 7                                            | 1.14  | 0.991 | 1.15 |
| <i>NFE2L1</i>    | nuclear factor (erythroid-derived 2)-like 1                                       | 1.14  | 0.835 | 1.37 |
| <i>AP1AR</i>     | adaptor-related protein complex 1 associated regulatory protein                   | 1.135 | 0.952 | 1.19 |
| <i>XBP1</i>      | X-box binding protein 1                                                           | 1.134 | 1.072 | 1.06 |
| <i>UGCG</i>      | UDP-glucose ceramide glucosyltransferase                                          | 1.131 | 1.352 | 0.84 |
| <i>LDLR</i>      | low density lipoprotein receptor                                                  | 1.13  | 0.82  | 1.38 |
| <i>OBFC2A</i>    | oligonucleotide/oligosaccharide-binding fold containing 2A                        | 1.13  | 1.113 | 1.02 |
| <i>LHFPL2</i>    | lipoma HMGIC fusion partner-like 2                                                | 1.127 | 0.596 | 1.89 |
| <i>RPL23AP13</i> | ribosomal protein L23a pseudogene 32                                              | 1.126 | 1.209 | 0.93 |
| <i>YRDC</i>      | yrdC domain containing (E. coli)                                                  | 1.117 | 1.18  | 0.95 |
| <i>SMURF1</i>    | SMAD specific E3 ubiquitin protein ligase 1                                       | 1.115 | 0.816 | 1.37 |
| <i>C10ORF12</i>  | chromosome 10 open reading frame 12                                               | 1.114 | 0.639 | 1.74 |
| <i>SRF</i>       | serum response factor (c-fos serum response element-binding transcription factor) | 1.114 | 0.807 | 1.38 |
| <i>ARHGEF2</i>   | Rho/Rac guanine nucleotide exchange factor (GEF) 2                                | 1.113 | 0.975 | 1.14 |

|                    |                                                                                                |       |       |      |
|--------------------|------------------------------------------------------------------------------------------------|-------|-------|------|
| <i>DENND4A</i>     | DENN/MADD domain containing 4A                                                                 | 1.113 | 0.614 | 1.81 |
| <i>MED13</i>       | mediator complex subunit 13                                                                    | 1.112 | 0.654 | 1.70 |
| <i>OSMR</i>        | oncostatin M receptor                                                                          | 1.112 | 0.644 | 1.73 |
| <i>TRIM65</i>      | tripartite motif-containing 65                                                                 | 1.111 | 1.328 | 0.84 |
| <i>LAMB3</i>       | laminin, beta 3                                                                                | 1.109 | 0.803 | 1.38 |
| <i>PAX8</i>        | paired box 8                                                                                   | 1.109 | 0.72  | 1.54 |
| <i>HIVEP2</i>      | human immunodeficiency virus type I enhancer binding protein 2                                 | 1.108 | 0.712 | 1.56 |
| <i>CNNM4</i>       | cyclin M4                                                                                      | 1.105 | 0.935 | 1.18 |
| <i>HELB</i>        | helicase (DNA) B                                                                               | 1.105 | 1.19  | 0.93 |
| <i>TRIP10</i>      | thyroid hormone receptor interactor 10                                                         | 1.105 | 0.659 | 1.68 |
| <i>KIAA0355</i>    | KIAA0355                                                                                       | 1.1   | 0.891 | 1.23 |
| <i>RASSF1</i>      | Ras association (RalGDS/AF-6) domain family member 1                                           | 1.099 | 0.766 | 1.43 |
| <i>NNMT</i>        | nicotinamide N-methyltransferase                                                               | 1.098 | 0.701 | 1.57 |
| <i>RNF24</i>       | ring finger protein 24                                                                         | 1.096 | 0.63  | 1.74 |
| <i>PPP2R5B</i>     | protein phosphatase 2, regulatory subunit B', beta                                             | 1.095 | 0.792 | 1.38 |
| <i>PTPN1</i>       | protein tyrosine phosphatase, non-receptor type 1                                              | 1.095 | 0.598 | 1.83 |
| <i>CA2</i>         | carbonic anhydrase II                                                                          | 1.093 | 1.087 | 1.01 |
| <i>TLR1</i>        | toll-like receptor 1                                                                           | 1.093 | 1.261 | 0.87 |
| <i>PPAN-P2RY11</i> | PPAN-P2RY11 readthrough                                                                        | 1.085 | 1.28  | 0.85 |
| <i>CCBE1</i>       | collagen and calcium binding EGF domains 1                                                     | 1.083 | 1.257 | 0.86 |
| <i>LRRFIP2</i>     | leucine rich repeat (in FLII) interacting protein 2                                            | 1.083 | 0.902 | 1.20 |
| <i>ASPHD2</i>      | aspartate beta-hydroxylase domain containing 2                                                 | 1.082 | 0.999 | 1.08 |
| <i>C14ORF82</i>    | chromosome 14 open reading frame 82                                                            | 1.082 | 1.607 | 0.67 |
| <i>PRKAG2</i>      | protein kinase, AMP-activated, gamma 2 non-catalytic subunit                                   | 1.082 | 0.624 | 1.73 |
| <i>EYA4</i>        | eyes absent homolog 4 (Drosophila)                                                             | 1.081 | 1.094 | 0.99 |
| <i>FAM176A</i>     | family with sequence similarity 176, member A                                                  | 1.081 | 0.713 | 1.52 |
| <i>SKIL</i>        | SKI-like oncogene                                                                              | 1.081 | 1.01  | 1.07 |
| <i>KDM4A</i>       | lysine (K)-specific demethylase 4A                                                             | 1.078 | 1.005 | 1.07 |
| <i>CSNK1E</i>      | casein kinase 1, epsilon                                                                       | 1.077 | 1.081 | 1.00 |
| <i>IL4R</i>        | interleukin 4 receptor                                                                         | 1.075 | 0.848 | 1.27 |
| <i>LOC653879</i>   | similar to Complement C3 precursor                                                             | 1.075 | 0.932 | 1.15 |
| <i>PLIN5</i>       | perilipin 5                                                                                    | 1.074 | 1.232 | 0.87 |
| <i>JUN</i>         | jun proto-oncogene                                                                             | 1.073 | 0.672 | 1.60 |
| <i>LOC648852</i>   | T cell receptor gamma variable 5                                                               | 1.073 | 1.397 | 0.77 |
| <i>TBC1D22B</i>    | TBC1 domain family, member 22B                                                                 | 1.073 | 0.818 | 1.31 |
| <i>EIF1</i>        | eukaryotic translation initiation factor 1                                                     | 1.072 | 0.674 | 1.59 |
| <i>RBM24</i>       | RNA binding motif protein 24                                                                   | 1.068 | 0.706 | 1.51 |
| <i>TFIP11</i>      | tuftelin interacting protein 11                                                                | 1.066 | 0.731 | 1.46 |
| <i>GAB2</i>        | GRB2-associated binding protein 2                                                              | 1.065 | 0.871 | 1.22 |
| <i>GINS4</i>       | GINS complex subunit 4 (Sld5 homolog)                                                          | 1.065 | 1.435 | 0.74 |
| <i>FOXP1</i>       | forkhead box K1                                                                                | 1.059 | 0.734 | 1.44 |
| <i>OSGIN2</i>      | oxidative stress induced growth inhibitor family member 2                                      | 1.059 | 0.988 | 1.07 |
| <i>NFAT5</i>       | nuclear factor of activated T-cells 5, tonicity-responsive                                     | 1.055 | 0.718 | 1.47 |
| <i>XRCC2</i>       | X-ray repair complementing defective repair in Chinese hamster cells 2                         | 1.052 | 1.34  | 0.79 |
| <i>PTPN12</i>      | protein tyrosine phosphatase, non-receptor type 12                                             | 1.049 | 0.85  | 1.23 |
| <i>MARK2</i>       | MAP/microtubule affinity-regulating kinase 2                                                   | 1.047 | 0.734 | 1.43 |
| <i>WDR33</i>       | WD repeat domain 33                                                                            | 1.044 | 0.748 | 1.40 |
| <i>MLL</i>         | myeloid/lymphoid or mixed-lineage leukemia (trithorax homolog, Drosophila)                     | 1.043 | 0.925 | 1.13 |
| <i>MLLT6</i>       | myeloid/lymphoid or mixed-lineage leukemia (trithorax homolog, Drosophila); translocated to, 6 | 1.041 | 0.875 | 1.19 |
| <i>CSRNP2</i>      | cysteine-serine-rich nuclear protein 2                                                         | 1.037 | 0.767 | 1.35 |
| <i>CCDC59</i>      | coiled-coil domain containing 59                                                               | 1.035 | 0.766 | 1.35 |

|                 |                                                                                        |       |       |      |
|-----------------|----------------------------------------------------------------------------------------|-------|-------|------|
| <i>COQ10B</i>   | coenzyme Q10 homolog B ( <i>S. cerevisiae</i> )                                        | 1.031 | 0.797 | 1.29 |
| <i>IL1RAP</i>   | interleukin 1 receptor accessory protein                                               | 1.031 | 1.001 | 1.03 |
| <i>PIP5K1A</i>  | phosphatidylinositol-4-phosphate 5-kinase, type I, alpha                               | 1.03  | 0.775 | 1.33 |
| <i>RBPMS</i>    | RNA binding protein with multiple splicing                                             | 1.03  | 0.684 | 1.51 |
| <i>RGS17</i>    | regulator of G-protein signaling 17                                                    | 1.03  | 0.827 | 1.25 |
| <i>DDX52</i>    | DEAD (Asp-Glu-Ala-Asp) box polypeptide 52                                              | 1.029 | 0.975 | 1.06 |
| <i>ETV5</i>     | ets variant 5                                                                          | 1.029 | 0.781 | 1.32 |
| <i>CATSPER2</i> | cation channel, sperm associated 2                                                     | 1.027 | 1.219 | 0.84 |
| <i>ARHGAP29</i> | Rho GTPase activating protein 29                                                       | 1.026 | 1.027 | 1.00 |
| <i>FAM100B</i>  | family with sequence similarity 100, member B                                          | 1.026 | 0.723 | 1.42 |
| <i>SEMA3C</i>   | sema domain, immunoglobulin domain (Ig), short basic domain, secreted, (semaphorin) 3C | 1.024 | 0.639 | 1.60 |
| <i>SEMA3E</i>   | sema domain, immunoglobulin domain (Ig), short basic domain, secreted, (semaphorin) 3E | 1.024 | 1.206 | 0.85 |
| <i>WDR43</i>    | WD repeat domain 43                                                                    | 1.022 | 0.658 | 1.55 |
| <i>CCNJL</i>    | cyclin J-like                                                                          | 1.02  | 0.761 | 1.34 |
| <i>FCAR</i>     | Fc fragment of IgA, receptor for                                                       | 1.02  | 1.098 | 0.93 |
| <i>TLK2</i>     | tousled-like kinase 2                                                                  | 1.02  | 0.736 | 1.39 |
| <i>DCBLD1</i>   | discoidin, CUB and LCCL domain containing 1                                            | 1.019 | 1.122 | 0.91 |
| <i>BMP2K</i>    | BMP2 inducible kinase                                                                  | 1.018 | 0.802 | 1.27 |
| <i>REL</i>      | v-rel reticuloendotheliosis viral oncogene homolog (avian)                             | 1.018 | 1.434 | 0.71 |
| <i>C7ORF53</i>  | chromosome 7 open reading frame 53                                                     | 1.017 | 0.746 | 1.36 |
| <i>TDRD1</i>    | tudor domain containing 1                                                              | 1.017 | 1.066 | 0.95 |
| <i>RGNEF</i>    | 190 kDa guanine nucleotide exchange factor                                             | 1.016 | 1.398 | 0.73 |
| <i>BID</i>      | BH3 interacting domain death agonist                                                   | 1.014 | 0.753 | 1.35 |
| <i>TAB2</i>     | TGF-beta activated kinase 1/MAP3K7 binding protein 2                                   | 1.014 | 0.661 | 1.53 |
| <i>ZNF643</i>   | zinc finger protein 643                                                                | 1.014 | 1.137 | 0.89 |
| <i>TLR6</i>     | toll-like receptor 6                                                                   | 1.011 | 0.952 | 1.06 |
| <i>STEAP1</i>   | six transmembrane epithelial antigen of the prostate 1                                 | 1.01  | 0.821 | 1.23 |
| <i>GATSL3</i>   | GATS protein-like 3                                                                    | 1.009 | 1.097 | 0.92 |
| <i>ADAM17</i>   | ADAM metallopeptidase domain 17                                                        | 1.008 | 0.768 | 1.31 |
| <i>IKBKE</i>    | inhibitor of kappa light polypeptide gene enhancer in B-cells, kinase epsilon          | 1.007 | 0.841 | 1.20 |
| <i>MMD</i>      | monocyte to macrophage differentiation-associated                                      | 1.007 | 0.859 | 1.17 |
| <i>PILRA</i>    | paired immunoglobulin-like type 2 receptor alpha                                       | 1.006 | 1.242 | 0.81 |
| <i>SSH1</i>     | slingshot homolog 1 ( <i>Drosophila</i> )                                              | 1.006 | 0.827 | 1.22 |
| <i>WBP4</i>     | WW domain binding protein 4 (formin binding protein 21)                                | 1.006 | 0.653 | 1.54 |
| <i>FOXC2</i>    | forkhead box C2 (MFH-1, mesenchyme forkhead 1)                                         | 1.005 | 0.836 | 1.20 |
| <i>RAB8B</i>    | RAB8B, member RAS oncogene family                                                      | 1.003 | 0.799 | 1.26 |
| <i>ATF4</i>     | activating transcription factor 4 (tax-responsive enhancer element B67)                | 1     | 1.147 | 0.87 |
| <i>ANKRD11</i>  | ankyrin repeat domain 11                                                               | 0.999 | 0.659 | 1.52 |
| <i>ARFRP1</i>   | ADP-ribosylation factor related protein 1                                              | 0.999 | 0.745 | 1.34 |
| <i>COL27A1</i>  | collagen, type XXVII, alpha 1                                                          | 0.999 | 0.754 | 1.32 |
| <i>MICALL1</i>  | MICAL-like 1                                                                           | 0.999 | 0.672 | 1.49 |
| <i>ADO</i>      | 2-aminoethanethiol (cysteamine) dioxygenase                                            | 0.993 | 0.784 | 1.27 |
| <i>IL6ST</i>    | interleukin 6 signal transducer (gp130, oncostatin M receptor)                         | 0.991 | 0.738 | 1.34 |
| <i>BLZF1</i>    | basic leucine zipper nuclear factor 1                                                  | 0.988 | 1.215 | 0.81 |
| <i>WDFY2</i>    | WD repeat and FYVE domain containing 2                                                 | 0.987 | 0.676 | 1.46 |
| <i>INSIG2</i>   | insulin induced gene 2                                                                 | 0.986 | 0.594 | 1.66 |
| <i>GRIPAP1</i>  | GRIP1 associated protein 1                                                             | 0.985 | 1.281 | 0.77 |
| <i>CLK4</i>     | CDC-like kinase 4                                                                      | 0.981 | 0.951 | 1.03 |
| <i>SLC5A8</i>   | solute carrier family 5 (iodide transporter), member 8                                 | 0.979 | 1.333 | 0.73 |
| <i>AKIRIN1</i>  | akirin 1                                                                               | 0.977 | 0.808 | 1.21 |
| <i>SHROOM4</i>  | shroom family member 4                                                                 | 0.977 | 1.155 | 0.85 |

|                 |                                                                                |       |       |      |
|-----------------|--------------------------------------------------------------------------------|-------|-------|------|
| <i>C9ORF30</i>  | chromosome 9 open reading frame 30                                             | 0.976 | 0.664 | 1.47 |
| <i>WNT5A</i>    | wingless-type MMTV integration site family, member 5A                          | 0.975 | 0.696 | 1.40 |
| <i>DCP1A</i>    | DCP1 decapping enzyme homolog A ( <i>S. cerevisiae</i> )                       | 0.974 | 0.75  | 1.30 |
| <i>NRIP1</i>    | nuclear receptor interacting protein 1                                         | 0.974 | 0.776 | 1.26 |
| <i>IL10RB</i>   | interleukin 10 receptor, beta                                                  | 0.973 | 0.751 | 1.30 |
| <i>PLSCR1</i>   | phospholipid scramblase 1                                                      | 0.973 | 0.733 | 1.33 |
| <i>CLK3</i>     | CDC-like kinase 3                                                              | 0.972 | 0.964 | 1.01 |
| <i>GARS</i>     | glycyl-tRNA synthetase                                                         | 0.972 | 0.784 | 1.24 |
| <i>IER5</i>     | immediate early response 5                                                     | 0.972 | 0.618 | 1.57 |
| <i>UCN2</i>     | urocortin 2                                                                    | 0.972 | 1.006 | 0.97 |
| <i>FAM53C</i>   | family with sequence similarity 53, member C                                   | 0.971 | 0.908 | 1.07 |
| <i>FAM73A</i>   | family with sequence similarity 73, member A                                   | 0.971 | 1.237 | 0.78 |
| <i>CASK</i>     | calcium/calmodulin-dependent serine protein kinase (MAGUK family)              | 0.969 | 0.698 | 1.39 |
| <i>PUS1</i>     | pseudouridylate synthase 1                                                     | 0.968 | 0.792 | 1.22 |
| <i>USP25</i>    | ubiquitin specific peptidase 25                                                | 0.967 | 0.76  | 1.27 |
| <i>BRAF</i>     | v-raf murine sarcoma viral oncogene homolog B1                                 | 0.965 | 0.646 | 1.49 |
| <i>ZFYVE27</i>  | zinc finger, FYVE domain containing 27                                         | 0.962 | 0.764 | 1.26 |
| <i>DEM1</i>     | defects in morphology 1 homolog ( <i>S. cerevisiae</i> )                       | 0.961 | 1.201 | 0.80 |
| <i>KIAA1751</i> | KIAA1751                                                                       | 0.957 | 1.265 | 0.76 |
| <i>ARL13B</i>   | ADP-ribosylation factor-like 13B                                               | 0.955 | 0.938 | 1.02 |
| <i>SPDYE6</i>   | speedy homolog E6 ( <i>Xenopus laevis</i> )                                    | 0.955 | 1.198 | 0.80 |
| <i>CHD1</i>     | chromodomain helicase DNA binding protein 1                                    | 0.954 | 0.871 | 1.10 |
| <i>TJAP1</i>    | tight junction associated protein 1 (peripheral)                               | 0.952 | 0.813 | 1.17 |
| <i>C19ORF61</i> | chromosome 19 open reading frame 61                                            | 0.951 | 0.736 | 1.29 |
| <i>ZNF549</i>   | zinc finger protein 549                                                        | 0.948 | 1.264 | 0.75 |
| <i>MCART1</i>   | mitochondrial carrier triple repeat 1                                          | 0.946 | 1.193 | 0.79 |
| <i>POLR3D</i>   | polymerase (RNA) III (DNA directed) polypeptide D, 44kDa                       | 0.946 | 0.699 | 1.35 |
| <i>TMEM17</i>   | transmembrane protein 17                                                       | 0.946 | 1.343 | 0.70 |
| <i>SIAH1</i>    | seven in absentia homolog 1 ( <i>Drosophila</i> )                              | 0.945 | 0.969 | 0.98 |
| <i>SLC25A25</i> | solute carrier family 25 (mitochondrial carrier; phosphate carrier), member 25 | 0.945 | 0.712 | 1.33 |
| <i>MYC</i>      | v-myc myelocytomatosis viral oncogene homolog (avian)                          | 0.944 | 1.206 | 0.78 |
| <i>SLC30A1</i>  | solute carrier family 30 (zinc transporter), member 1                          | 0.943 | 0.802 | 1.18 |
| <i>CYTSA</i>    | cytospin A                                                                     | 0.942 | 0.76  | 1.24 |
| <i>AXIN1</i>    | axin 1                                                                         | 0.941 | 0.703 | 1.34 |
| <i>C1ORF55</i>  | chromosome 1 open reading frame 55                                             | 0.941 | 0.738 | 1.28 |
| <i>CDC42EP1</i> | CDC42 effector protein (Rho GTPase binding) 1                                  | 0.941 | 0.688 | 1.37 |
| <i>PLK2</i>     | polo-like kinase 2                                                             | 0.941 | 1.472 | 0.64 |
| <i>NPC1</i>     | Niemann-Pick disease, type C1                                                  | 0.939 | 0.809 | 1.16 |
| <i>CD44</i>     | CD44 molecule (Indian blood group)                                             | 0.938 | 0.674 | 1.39 |
| <i>MAGT1</i>    | magnesium transporter 1                                                        | 0.938 | 1.196 | 0.78 |
| <i>KCMF1</i>    | potassium channel modulatory factor 1                                          | 0.936 | 0.61  | 1.53 |
| <i>EGLN2</i>    | egl nine homolog 2 ( <i>C. elegans</i> )                                       | 0.935 | 0.791 | 1.18 |
| <i>TANK</i>     | TRAF family member-associated NFKB activator                                   | 0.935 | 0.86  | 1.09 |
| <i>ZNF14</i>    | zinc finger protein 14                                                         | 0.935 | 1.413 | 0.66 |
| <i>PKD1</i>     | polycystic kidney disease 1 (autosomal dominant)                               | 0.934 | 0.764 | 1.22 |
| <i>NAT9</i>     | N-acetyltransferase 9 (GCN5-related, putative)                                 | 0.93  | 0.676 | 1.38 |
| <i>ZNF774</i>   | zinc finger protein 774                                                        | 0.929 | 1.619 | 0.57 |
| <i>ISM1</i>     | isthmin 1 homolog (zebrafish)                                                  | 0.926 | 0.592 | 1.56 |
| <i>DUSP19</i>   | dual specificity phosphatase 19                                                | 0.925 | 1.07  | 0.86 |
| <i>LMOD3</i>    | leiomodulin 3 (fetal)                                                          | 0.925 | 1.46  | 0.63 |
| <i>RSL24D1</i>  | ribosomal L24 domain containing 1                                              | 0.925 | 0.658 | 1.41 |
| <i>GNA13</i>    | guanine nucleotide binding protein (G protein), alpha 13                       | 0.922 | 0.695 | 1.33 |
| <i>INO80D</i>   | INO80 complex subunit D                                                        | 0.918 | 0.677 | 1.36 |

|                                 |                                                                                           |       |       |      |
|---------------------------------|-------------------------------------------------------------------------------------------|-------|-------|------|
| <i>KIF3C</i>                    | kinesin family member 3C                                                                  | 0.918 | 0.663 | 1.38 |
| <i>SPN</i>                      | sialophorin                                                                               | 0.917 | 1.146 | 0.80 |
| <i>C11ORF63</i>                 | chromosome 11 open reading frame 63                                                       | 0.915 | 1.021 | 0.90 |
| <i>C7ORF55</i>                  | chromosome 7 open reading frame 55                                                        | 0.915 | 1.222 | 0.75 |
| <i>PAWR</i>                     | PRKC, apoptosis, WT1, regulator                                                           | 0.913 | 0.663 | 1.38 |
| <i>FAM110A</i>                  | family with sequence similarity 110, member A                                             | 0.912 | 0.946 | 0.96 |
| <i>NFIL3</i>                    | nuclear factor, interleukin 3 regulated                                                   | 0.912 | 1.232 | 0.74 |
| <i>EGLN1</i>                    | egl nine homolog 1 ( <i>C. elegans</i> )                                                  | 0.911 | 0.614 | 1.48 |
| <i>CNOT4</i>                    | CCR4-NOT transcription complex, subunit 4                                                 | 0.91  | 0.965 | 0.94 |
| <i>FBXO11</i>                   | F-box protein 11                                                                          | 0.91  | 0.753 | 1.21 |
| <i>LIMK2</i>                    | LIM domain kinase 2                                                                       | 0.906 | 1.061 | 0.85 |
| <i>NAMPT</i>                    | nicotinamide phosphoribosyltransferase                                                    | 0.906 | 0.901 | 1.01 |
| <i>ANKRD44</i>                  | ankyrin repeat domain 44                                                                  | 0.905 | 1.065 | 0.85 |
| <i>JAG1</i>                     | jagged 1                                                                                  | 0.903 | 0.91  | 0.99 |
| <i>MBTD1</i>                    | mbt domain containing 1                                                                   | 0.903 | 1.493 | 0.60 |
| <i>MEX3C</i>                    | mex-3 homolog C ( <i>C. elegans</i> )                                                     | 0.903 | 0.661 | 1.37 |
| <i>RNF19A</i>                   | ring finger protein 19A                                                                   | 0.903 | 0.707 | 1.28 |
| <i>RUNX2</i>                    | runt-related transcription factor 2                                                       | 0.897 | 0.93  | 0.96 |
| <i>SATB2</i>                    | SATB homeobox 2                                                                           | 0.896 | 0.658 | 1.36 |
| <i>SLC35E1</i>                  | solute carrier family 35, member E1                                                       | 0.894 | 0.989 | 0.90 |
| <i>HNRPDL</i>                   | heterogeneous nuclear ribonucleoprotein D-like                                            | 0.893 | 0.642 | 1.39 |
| <i>FBRS</i>                     | fibrosin                                                                                  | 0.892 | 0.738 | 1.21 |
| <i>SARS</i>                     | seryl-tRNA synthetase                                                                     | 0.892 | 0.601 | 1.48 |
| <i>SLC38A1</i>                  | solute carrier family 38, member 1                                                        | 0.892 | 0.648 | 1.38 |
| <i>TDP1</i>                     | tyrosyl-DNA phosphodiesterase 1                                                           | 0.892 | 1.131 | 0.79 |
| <i>ARIH1</i>                    | ariadne homolog, ubiquitin-conjugating enzyme E2 binding protein, 1 ( <i>Drosophila</i> ) | 0.891 | 0.679 | 1.31 |
| <i>CHRNA5</i>                   | cholinergic receptor, nicotinic, alpha 5                                                  | 0.891 | 1.174 | 0.76 |
| <i>GMEB2</i>                    | glucocorticoid modulatory element binding protein 2                                       | 0.891 | 0.836 | 1.07 |
| <i>DNMT3B</i>                   | DNA (cytosine-5-)-methyltransferase 3 beta                                                | 0.89  | 0.716 | 1.24 |
| <i>ZNF319</i>                   | zinc finger protein 319                                                                   | 0.89  | 0.98  | 0.91 |
| <i>SH3PXD2B</i>                 | SH3 and PX domains 2B                                                                     | 0.889 | 0.645 | 1.38 |
| <i>NDEL1</i>                    | nudE nuclear distribution gene E homolog ( <i>A. nidulans</i> )-like 1                    | 0.888 | 0.684 | 1.30 |
| <i>VEZT</i>                     | vezatin, adherens junctions transmembrane protein                                         | 0.887 | 0.587 | 1.51 |
| <i>TRIM13</i>                   | tripartite motif-containing 13                                                            | 0.886 | 0.936 | 0.95 |
| <i>NLK</i>                      | nemo-like kinase                                                                          | 0.885 | 0.594 | 1.49 |
| <i>C3ORF34</i>                  | chromosome 3 open reading frame 34                                                        | 0.884 | 1.032 | 0.86 |
| <i>FAM131A</i>                  | family with sequence similarity 131, member A                                             | 0.884 | 0.904 | 0.98 |
| <i>SLMO1</i>                    | slowmo homolog 1 ( <i>Drosophila</i> )                                                    | 0.882 | 0.812 | 1.09 |
| <i>EBI3</i>                     | Epstein-Barr virus induced 3                                                              | 0.878 | 0.622 | 1.41 |
| <i>ZCCHC7</i>                   | zinc finger, CCHC domain containing 7                                                     | 0.878 | 0.636 | 1.38 |
| <i>QPCT (includes EG:25797)</i> | glutaminy-peptide cyclotransferase                                                        | 0.877 | 0.664 | 1.32 |
| <i>ABL1</i>                     | c-abl oncogene 1, non-receptor tyrosine kinase                                            | 0.876 | 0.618 | 1.42 |
| <i>KIAA1310</i>                 | KIAA1310                                                                                  | 0.875 | 0.683 | 1.28 |
| <i>ZNF669</i>                   | zinc finger protein 669                                                                   | 0.874 | 0.797 | 1.10 |
| <i>MTMR3</i>                    | myotubularin related protein 3                                                            | 0.873 | 0.77  | 1.13 |
| <i>NPIPL3</i>                   | nuclear pore complex interacting protein-like 3                                           | 0.873 | 0.734 | 1.19 |
| <i>TNS1</i>                     | tensin 1                                                                                  | 0.873 | 0.596 | 1.46 |
| <i>ZBTB7B</i>                   | zinc finger and BTB domain containing 7B                                                  | 0.869 | 0.909 | 0.96 |
| <i>CEP120</i>                   | centrosomal protein 120kDa                                                                | 0.867 | 0.864 | 1.00 |
| <i>WAC</i>                      | WW domain containing adaptor with coiled-coil                                             | 0.867 | 0.76  | 1.14 |
| <i>SNAPC1</i>                   | small nuclear RNA activating complex, polypeptide 1, 43kDa                                | 0.861 | 0.864 | 1.00 |
| <i>NLRP8</i>                    | NLR family, pyrin domain containing 8                                                     | 0.86  | 1.174 | 0.73 |

|                   |                                                                           |       |       |      |
|-------------------|---------------------------------------------------------------------------|-------|-------|------|
| <i>PML</i>        | promyelocytic leukemia                                                    | 0.859 | 0.699 | 1.23 |
| <i>ZNF787</i>     | zinc finger protein 787                                                   | 0.858 | 0.622 | 1.38 |
| <i>CHST15</i>     | carbohydrate (N-acetylgalactosamine 4-sulfate 6-O) sulfotransferase 15    | 0.857 | 0.685 | 1.25 |
| <i>LOC646463</i>  | ubiquitin-conjugating enzyme E2H (UBC8 homolog, yeast) pseudogene 1       | 0.857 | 0.784 | 1.09 |
| <i>ZNF160</i>     | zinc finger protein 160                                                   | 0.857 | 1.092 | 0.78 |
| <i>RPL37</i>      | ribosomal protein L37                                                     | 0.856 | 0.795 | 1.08 |
| <i>HECA</i>       | headcase homolog (Drosophila)                                             | 0.855 | 0.869 | 0.98 |
| <i>DDX51</i>      | DEAD (Asp-Glu-Ala-Asp) box polypeptide 51                                 | 0.854 | 1.16  | 0.74 |
| <i>GTPBP4</i>     | GTP binding protein 4                                                     | 0.853 | 0.646 | 1.32 |
| <i>EID3</i>       | EP300 interacting inhibitor of differentiation 3                          | 0.852 | 0.928 | 0.92 |
| <i>ULK1</i>       | unc-51-like kinase 1 (C. elegans)                                         | 0.849 | 0.914 | 0.93 |
| <i>N4BP2</i>      | NEDD4 binding protein 2                                                   | 0.848 | 1.014 | 0.84 |
| <i>METRNL</i>     | meteorin, glial cell differentiation regulator-like                       | 0.847 | 0.619 | 1.37 |
| <i>ZNF394</i>     | zinc finger protein 394                                                   | 0.846 | 1.056 | 0.80 |
| <i>ARID1A</i>     | AT rich interactive domain 1A (SWI-like)                                  | 0.843 | 0.591 | 1.43 |
| <i>C7ORF41</i>    | chromosome 7 open reading frame 41                                        | 0.843 | 0.587 | 1.44 |
| <i>CBL</i>        | Cas-Br-M (murine) ecotropic retroviral transforming sequence              | 0.841 | 0.892 | 0.94 |
| <i>FKBP14</i>     | FK506 binding protein 14, 22 kDa                                          | 0.839 | 1.171 | 0.72 |
| <i>KCNH6</i>      | potassium voltage-gated channel, subfamily H (eag-related), member 6      | 0.839 | 0.971 | 0.86 |
| <i>BTN2A1</i>     | butyrophilin, subfamily 2, member A1                                      | 0.837 | 0.971 | 0.86 |
| <i>MYO1B</i>      | myosin IB                                                                 | 0.835 | 0.635 | 1.31 |
| <i>GCNT2</i>      | glucosaminyl (N-acetyl) transferase 2, I-branching enzyme (I blood group) | 0.834 | 0.692 | 1.21 |
| <i>IGFN1</i>      | immunoglobulin-like and fibronectin type III domain containing 1          | 0.833 | 0.714 | 1.17 |
| <i>PLAGL2</i>     | pleiomorphic adenoma gene-like 2                                          | 0.833 | 0.652 | 1.28 |
| <i>NFX1</i>       | nuclear transcription factor, X-box binding 1                             | 0.832 | 1.157 | 0.72 |
| <i>ZNF483</i>     | zinc finger protein 483                                                   | 0.83  | 1.167 | 0.71 |
| <i>MTAP</i>       | methylthioadenosine phosphorylase                                         | 0.828 | 0.878 | 0.94 |
| <i>HINT3</i>      | histidine triad nucleotide binding protein 3                              | 0.826 | 0.795 | 1.04 |
| <i>ZNF707</i>     | zinc finger protein 707                                                   | 0.826 | 0.937 | 0.88 |
| <i>PDE8A</i>      | phosphodiesterase 8A                                                      | 0.825 | 0.681 | 1.21 |
| <i>CSNK1G3</i>    | casein kinase 1, gamma 3                                                  | 0.824 | 0.607 | 1.36 |
| <i>LOC728734</i>  | similar to NPIP-like protein ENSP00000283050                              | 0.823 | 0.609 | 1.35 |
| <i>LRRFIP1</i>    | leucine rich repeat (in FLII) interacting protein 1                       | 0.823 | 0.795 | 1.04 |
| <i>XPO5</i>       | exportin 5                                                                | 0.823 | 0.61  | 1.35 |
| <i>CDKN2AIPNL</i> | CDKN2A interacting protein N-terminal like                                | 0.821 | 1.095 | 0.75 |
| <i>USP49</i>      | ubiquitin specific peptidase 49                                           | 0.821 | 1.035 | 0.79 |
| <i>UBE2H</i>      | ubiquitin-conjugating enzyme E2H (UBC8 homolog, yeast)                    | 0.82  | 0.836 | 0.98 |
| <i>E2F5</i>       | E2F transcription factor 5, p130-binding                                  | 0.818 | 0.963 | 0.85 |
| <i>SLC25A20</i>   | solute carrier family 25 (carnitine/acylcarnitine translocase), member 20 | 0.818 | 1.184 | 0.69 |
| <i>TMEM92</i>     | transmembrane protein 92                                                  | 0.817 | 0.702 | 1.16 |
| <i>C15ORF63</i>   | chromosome 15 open reading frame 63                                       | 0.816 | 1.039 | 0.79 |
| <i>TLE3</i>       | transducin-like enhancer of split 3 (E(sp1) homolog, Drosophila)          | 0.816 | 0.89  | 0.92 |
| <i>FAM110B</i>    | family with sequence similarity 110, member B                             | 0.815 | 1.004 | 0.81 |
| <i>ZNF282</i>     | zinc finger protein 282                                                   | 0.815 | 0.749 | 1.09 |
| <i>PDP1</i>       | pyruvate dehydrogenase phosphatase catalytic subunit 1                    | 0.814 | 0.763 | 1.07 |
| <i>KCTD15</i>     | potassium channel tetramerisation domain containing 15                    | 0.812 | 0.68  | 1.19 |
| <i>RNF44</i>      | ring finger protein 44                                                    | 0.812 | 0.869 | 0.93 |
| <i>RUSC2</i>      | RUN and SH3 domain containing 2                                           | 0.812 | 0.692 | 1.17 |

|                   |                                                                                                |       |       |      |
|-------------------|------------------------------------------------------------------------------------------------|-------|-------|------|
| <i>ITPK1AS</i>    | ITPK1 antisense RNA (non-protein coding)                                                       | 0.808 | 1.031 | 0.78 |
| <i>LIG4</i>       | ligase IV, DNA, ATP-dependent                                                                  | 0.807 | 0.989 | 0.82 |
| <i>MGC87042</i>   | STEAP family protein MGC87042                                                                  | 0.807 | 0.762 | 1.06 |
| <i>NCRNA00219</i> | non-protein coding RNA 219                                                                     | 0.807 | 0.704 | 1.15 |
| <i>INADL</i>      | InaD-like (Drosophila)                                                                         | 0.806 | 0.628 | 1.28 |
| <i>URB2</i>       | URB2 ribosome biogenesis 2 homolog (S. cerevisiae)                                             | 0.806 | 0.65  | 1.24 |
| <i>ZCCHC8</i>     | zinc finger, CCHC domain containing 8                                                          | 0.806 | 0.872 | 0.92 |
| <i>SIAH2</i>      | seven in absentia homolog 2 (Drosophila)                                                       | 0.804 | 0.665 | 1.21 |
| <i>ZNF335</i>     | zinc finger protein 335                                                                        | 0.802 | 0.739 | 1.09 |
| <i>AMMECR1L</i>   | AMME chromosomal region gene 1-like                                                            | 0.801 | 0.899 | 0.89 |
| <i>GSDMB</i>      | gasdermin B                                                                                    | 0.801 | 1.146 | 0.70 |
| <i>GALNT4</i>     | UDP-N-acetyl-alpha-D-galactosamine:polypeptide N-acetylgalactosaminyltransferase 4 (GalNAc-T4) | 0.8   | 0.653 | 1.23 |
| <i>ZNF140</i>     | zinc finger protein 140                                                                        | 0.799 | 0.679 | 1.18 |
| <i>BCL2</i>       | B-cell CLL/lymphoma 2                                                                          | 0.798 | 0.687 | 1.16 |
| <i>RNF41</i>      | ring finger protein 41                                                                         | 0.797 | 0.829 | 0.96 |
| <i>C14ORF153</i>  | chromosome 14 open reading frame 153                                                           | 0.796 | 1.022 | 0.78 |
| <i>SLC16A9</i>    | solute carrier family 16, member 9 (monocarboxylic acid transporter 9)                         | 0.796 | 0.742 | 1.07 |
| <i>SNRK</i>       | SNF related kinase                                                                             | 0.796 | 0.74  | 1.08 |
| <i>SPIRE1</i>     | spire homolog 1 (Drosophila)                                                                   | 0.795 | 0.61  | 1.30 |
| <i>TLE4</i>       | transducin-like enhancer of split 4 (E(sp1) homolog, Drosophila)                               | 0.795 | 0.825 | 0.96 |
| <i>FAM119A</i>    | family with sequence similarity 119, member A                                                  | 0.794 | 1.106 | 0.72 |
| <i>DMC1</i>       | DMC1 dosage suppressor of mck1 homolog, meiosis-specific homologous recombination (yeast)      | 0.793 | 1.126 | 0.70 |
| <i>FOSL2</i>      | FOS-like antigen 2                                                                             | 0.79  | 0.967 | 0.82 |
| <i>SENP5</i>      | SUMO1/sentrin specific peptidase 5                                                             | 0.79  | 0.905 | 0.87 |
| <i>AARS</i>       | alanyl-tRNA synthetase                                                                         | 0.788 | 0.735 | 1.07 |
| <i>MID1IP1</i>    | MID1 interacting protein 1 (gastrulation specific G12 homolog (zebrafish))                     | 0.788 | 0.689 | 1.14 |
| <i>FAM89A</i>     | family with sequence similarity 89, member A                                                   | 0.787 | 0.616 | 1.28 |
| <i>SETD8</i>      | SET domain containing (lysine methyltransferase) 8                                             | 0.787 | 0.662 | 1.19 |
| <i>ASB7</i>       | ankyrin repeat and SOCS box-containing 7                                                       | 0.786 | 0.696 | 1.13 |
| <i>ST3GAL4</i>    | ST3 beta-galactoside alpha-2,3-sialyltransferase 4                                             | 0.786 | 0.601 | 1.31 |
| <i>PPA2</i>       | pyrophosphatase (inorganic) 2                                                                  | 0.783 | 0.926 | 0.85 |
| <i>PTGR2</i>      | prostaglandin reductase 2                                                                      | 0.78  | 1.09  | 0.72 |
| <i>LEP</i>        | leptin                                                                                         | 0.777 | 1.132 | 0.69 |
| <i>ZGPAT</i>      | zinc finger, CCCH-type with G patch domain                                                     | 0.776 | 0.604 | 1.28 |
| <i>APBA3</i>      | amyloid beta (A4) precursor protein-binding, family A, member 3                                | 0.775 | 0.597 | 1.30 |
| <i>EID2B</i>      | EP300 interacting inhibitor of differentiation 2B                                              | 0.775 | 1.093 | 0.71 |
| <i>NCK1</i>       | NCK adaptor protein 1                                                                          | 0.775 | 0.86  | 0.90 |
| <i>ARHGAP31</i>   | Rho GTPase activating protein 31                                                               | 0.774 | 0.801 | 0.97 |
| <i>GMIP</i>       | GEM interacting protein                                                                        | 0.773 | 0.645 | 1.20 |
| <i>ZNF773</i>     | zinc finger protein 773                                                                        | 0.773 | 0.835 | 0.93 |
| <i>ZNF577</i>     | zinc finger protein 577                                                                        | 0.772 | 0.98  | 0.79 |
| <i>ERAP2</i>      | endoplasmic reticulum aminopeptidase 2                                                         | 0.771 | 1.097 | 0.70 |
| <i>DAXX</i>       | death-domain associated protein                                                                | 0.77  | 0.709 | 1.09 |
| <i>FMNL2</i>      | formin-like 2                                                                                  | 0.77  | 0.619 | 1.24 |
| <i>PSMD12</i>     | proteasome (prosome, macropain) 26S subunit, non-ATPase, 12                                    | 0.77  | 0.862 | 0.89 |
| <i>EVI5</i>       | ecotropic viral integration site 5                                                             | 0.769 | 0.738 | 1.04 |
| <i>PLEKHH3</i>    | pleckstrin homology domain containing, family H (with MyTH4 domain) member 3                   | 0.769 | 0.897 | 0.86 |
| <i>STEAP2</i>     | six transmembrane epithelial antigen of the prostate 2                                         | 0.769 | 1.091 | 0.70 |

|                   |                                                                                                |       |       |      |
|-------------------|------------------------------------------------------------------------------------------------|-------|-------|------|
| <i>RCHY1</i>      | ring finger and CHY zinc finger domain containing 1                                            | 0.766 | 0.599 | 1.28 |
| <i>C19ORF48</i>   | chromosome 19 open reading frame 48                                                            | 0.765 | 0.884 | 0.87 |
| <i>MCL1</i>       | myeloid cell leukemia sequence 1 (BCL2-related)                                                | 0.763 | 0.723 | 1.06 |
| <i>TXNRD1</i>     | thioredoxin reductase 1                                                                        | 0.76  | 0.587 | 1.29 |
| <i>SLC7A5</i>     | solute carrier family 7 (cationic amino acid transporter, y+ system), member 5                 | 0.756 | 0.625 | 1.21 |
| <i>GLI1</i>       | GLI family zinc finger 1                                                                       | 0.755 | 0.627 | 1.20 |
| <i>ST7L</i>       | suppression of tumorigenicity 7 like                                                           | 0.754 | 0.717 | 1.05 |
| <i>CCNB1IP1</i>   | cyclin B1 interacting protein 1                                                                | 0.753 | 0.594 | 1.27 |
| <i>WNK1</i>       | WNK lysine deficient protein kinase 1                                                          | 0.753 | 0.86  | 0.88 |
| <i>FAM40A</i>     | family with sequence similarity 40, member A                                                   | 0.752 | 0.598 | 1.26 |
| <i>UTP15</i>      | UTP15, U3 small nucleolar ribonucleoprotein, homolog (S. cerevisiae)                           | 0.75  | 0.627 | 1.20 |
| <i>RBM3</i>       | RNA binding motif (RNP1, RRM) protein 3                                                        | 0.748 | 1.037 | 0.72 |
| <i>DMTF1</i>      | cyclin D binding myb-like transcription factor 1                                               | 0.747 | 0.605 | 1.23 |
| <i>GALNT3</i>     | UDP-N-acetyl-alpha-D-galactosamine:polypeptide N-acetylgalactosaminyltransferase 3 (GalNAc-T3) | 0.747 | 0.753 | 0.99 |
| <i>CXCR4</i>      | chemokine (C-X-C motif) receptor 4                                                             | 0.744 | 1.065 | 0.70 |
| <i>ZMYND11</i>    | zinc finger, MYND domain containing 11                                                         | 0.743 | 0.757 | 0.98 |
| <i>ZNF682</i>     | zinc finger protein 682                                                                        | 0.742 | 0.967 | 0.77 |
| <i>KRAS</i>       | v-Ki-ras2 Kirsten rat sarcoma viral oncogene homolog                                           | 0.741 | 0.592 | 1.25 |
| <i>CNST</i>       | consortin, connexin sorting protein                                                            | 0.74  | 0.757 | 0.98 |
| <i>ZNF641</i>     | zinc finger protein 641                                                                        | 0.74  | 0.594 | 1.25 |
| <i>SRC</i>        | v-src sarcoma (Schmidt-Ruppin A-2) viral oncogene homolog (avian)                              | 0.739 | 0.642 | 1.15 |
| <i>NCRNA00114</i> | non-protein coding RNA 114                                                                     | 0.738 | 1.022 | 0.72 |
| <i>ZFP36L1</i>    | zinc finger protein 36, C3H type-like 1                                                        | 0.738 | 1.091 | 0.68 |
| <i>ZNF600</i>     | zinc finger protein 600                                                                        | 0.737 | 0.833 | 0.88 |
| <i>WDR52</i>      | WD repeat domain 52                                                                            | 0.732 | 0.688 | 1.06 |
| <i>ING5</i>       | inhibitor of growth family, member 5                                                           | 0.73  | 0.757 | 0.96 |
| <i>SNAPC4</i>     | small nuclear RNA activating complex, polypeptide 4, 190kDa                                    | 0.73  | 0.813 | 0.90 |
| <i>CRAMP1L</i>    | Crm, cramped-like (Drosophila)                                                                 | 0.729 | 0.666 | 1.09 |
| <i>SLC12A4</i>    | solute carrier family 12 (potassium/chloride transporters), member 4                           | 0.727 | 0.686 | 1.06 |
| <i>BSDC1</i>      | BSD domain containing 1                                                                        | 0.724 | 0.632 | 1.15 |
| <i>FAM115C</i>    | family with sequence similarity 115, member C                                                  | 0.722 | 0.996 | 0.72 |
| <i>TNFSF14</i>    | tumor necrosis factor (ligand) superfamily, member 14                                          | 0.718 | 0.859 | 0.84 |
| <i>FAM40B</i>     | family with sequence similarity 40, member B                                                   | 0.714 | 0.869 | 0.82 |
| <i>WSB1</i>       | WD repeat and SOCS box-containing 1                                                            | 0.713 | 0.856 | 0.83 |
| <i>NKIRAS1</i>    | NFKB inhibitor interacting Ras-like 1                                                          | 0.709 | 0.823 | 0.86 |
| <i>PHAX</i>       | phosphorylated adaptor for RNA export                                                          | 0.709 | 0.759 | 0.93 |
| <i>PCDHB9</i>     | protocadherin beta 9                                                                           | 0.708 | 0.926 | 0.76 |
| <i>PLA2G2D</i>    | phospholipase A2, group IID                                                                    | 0.706 | 1.048 | 0.67 |
| <i>C15ORF52</i>   | chromosome 15 open reading frame 52                                                            | 0.705 | 0.721 | 0.98 |
| <i>LRIG2</i>      | leucine-rich repeats and immunoglobulin-like domains 2                                         | 0.705 | 0.925 | 0.76 |
| <i>RHBDL2</i>     | rhomboid, veinlet-like 2 (Drosophila)                                                          | 0.705 | 0.875 | 0.81 |
| <i>RDH10</i>      | retinol dehydrogenase 10 (all-trans)                                                           | 0.704 | 0.804 | 0.88 |
| <i>CSF1</i>       | colony stimulating factor 1 (macrophage)                                                       | 0.703 | 0.815 | 0.86 |
| <i>GOSR1</i>      | golgi SNAP receptor complex member 1                                                           | 0.703 | 0.881 | 0.80 |
| <i>PDE7A</i>      | phosphodiesterase 7A                                                                           | 0.703 | 1.041 | 0.68 |
| <i>RGPD8</i>      | RANBP2-like and GRIP domain containing 8                                                       | 0.702 | 0.874 | 0.80 |
| <i>PTP4A2</i>     | protein tyrosine phosphatase type IVA, member 2                                                | 0.698 | 0.899 | 0.78 |
| <i>C7ORF43</i>    | chromosome 7 open reading frame 43                                                             | 0.697 | 0.746 | 0.93 |
| <i>C1ORF109</i>   | chromosome 1 open reading frame 109                                                            | 0.695 | 0.652 | 1.07 |
| <i>CCNL1</i>      | cyclin L1                                                                                      | 0.695 | 0.634 | 1.10 |



|                     |                                                                                       |       |       |      |
|---------------------|---------------------------------------------------------------------------------------|-------|-------|------|
| <i>MIER2</i>        | mesoderm induction early response 1, family member 2                                  | 0.694 | 0.794 | 0.87 |
| <i>GJB2</i>         | gap junction protein, beta 2, 26kDa                                                   | 0.693 | 0.607 | 1.14 |
| <i>POGK</i>         | pogo transposable element with KRAB domain                                            | 0.691 | 0.595 | 1.16 |
| <i>VPS37A</i>       | vacuolar protein sorting 37 homolog A ( <i>S. cerevisiae</i> )                        | 0.691 | 0.631 | 1.10 |
| <i>ERCC4</i>        | excision repair cross-complementing rodent repair deficiency, complementation group 4 | 0.69  | 0.859 | 0.80 |
| <i>LOC652634</i>    | similar to fem-1 homolog a ( <i>C.elegans</i> )                                       | 0.689 | 0.686 | 1.00 |
| <i>ZNF24</i>        | zinc finger protein 24                                                                | 0.689 | 0.73  | 0.94 |
| <i>ABCA1</i>        | ATP-binding cassette, sub-family A (ABC1), member 1                                   | 0.687 | 0.586 | 1.17 |
| <i>SAV1</i>         | salvador homolog 1 ( <i>Drosophila</i> )                                              | 0.687 | 0.594 | 1.16 |
| <i>LOC100132979</i> | golgin A8 family, member D (pseudogene)                                               | 0.686 | 0.603 | 1.14 |
| <i>TGIF1</i>        | TGFB-induced factor homeobox 1                                                        | 0.685 | 0.681 | 1.01 |
| <i>IL17RD</i>       | interleukin 17 receptor D                                                             | 0.683 | 0.971 | 0.70 |
| <i>CRCP</i>         | CGRP receptor component                                                               | 0.681 | 1.077 | 0.63 |
| <i>RGPD3</i>        | RANBP2-like and GRIP domain containing 3                                              | 0.681 | 0.824 | 0.83 |
| <i>IPPK</i>         | inositol 1,3,4,5,6-pentakisphosphate 2-kinase                                         | 0.68  | 0.869 | 0.78 |
| <i>HNRNPU</i>       | heterogeneous nuclear ribonucleoprotein U (scaffold attachment factor A)              | 0.679 | 0.974 | 0.70 |
| <i>LOC338758</i>    | hypothetical LOC338758                                                                | 0.678 | 0.64  | 1.06 |
| <i>ZNF69</i>        | zinc finger protein 69                                                                | 0.675 | 0.952 | 0.71 |
| <i>ERN1</i>         | endoplasmic reticulum to nucleus signaling 1                                          | 0.674 | 0.885 | 0.76 |
| <i>GOLGA8A</i>      | golgin A8 family, member A                                                            | 0.674 | 0.79  | 0.85 |
| <i>TMEM79</i>       | transmembrane protein 79                                                              | 0.673 | 0.948 | 0.71 |
| <i>ZRANB1</i>       | zinc finger, RAN-binding domain containing 1                                          | 0.673 | 0.622 | 1.08 |
| <i>SIRT1</i>        | sirtuin 1                                                                             | 0.671 | 0.585 | 1.15 |
| <i>HSD17B7</i>      | hydroxysteroid (17-beta) dehydrogenase 7                                              | 0.669 | 0.931 | 0.72 |
| <i>COL7A1</i>       | collagen, type VII, alpha 1                                                           | 0.668 | 0.712 | 0.94 |
| <i>ADAMTS1</i>      | ADAM metallopeptidase with thrombospondin type 1 motif, 1                             | 0.667 | 1.096 | 0.61 |
| <i>KLF11</i>        | Kruppel-like factor 11                                                                | 0.667 | 0.662 | 1.01 |
| <i>NXT1</i>         | NTF2-like export factor 1                                                             | 0.667 | 0.649 | 1.03 |
| <i>ZCCHC6</i>       | zinc finger, CCHC domain containing 6                                                 | 0.667 | 0.595 | 1.12 |
| <i>C8ORF45</i>      | chromosome 8 open reading frame 45                                                    | 0.665 | 1.02  | 0.65 |
| <i>C9ORF80</i>      | chromosome 9 open reading frame 80                                                    | 0.663 | 0.848 | 0.78 |
| <i>SPTLC1</i>       | serine palmitoyltransferase, long chain base subunit 1                                | 0.662 | 0.942 | 0.70 |
| <i>STK38L</i>       | serine/threonine kinase 38 like                                                       | 0.662 | 0.648 | 1.02 |
| <i>XPNPEP3</i>      | X-prolyl aminopeptidase (aminopeptidase P) 3, putative                                | 0.66  | 0.736 | 0.90 |
| <i>OCIAD1</i>       | OCIA domain containing 1                                                              | 0.655 | 0.897 | 0.73 |
| <i>SSTR2</i>        | somatostatin receptor 2                                                               | 0.655 | 1.12  | 0.58 |
| <i>MGC12760</i>     | ciliary rootlet coiled-coil, rootletin pseudogene 2                                   | 0.654 | 1.392 | 0.47 |
| <i>ZNF460</i>       | zinc finger protein 460                                                               | 0.65  | 0.984 | 0.66 |
| <i>HIATL2</i>       | hippocampus abundant transcript-like 2                                                | 0.648 | 1.066 | 0.61 |
| <i>GCLC</i>         | glutamate-cysteine ligase, catalytic subunit                                          | 0.647 | 0.821 | 0.79 |
| <i>KCNH1</i>        | potassium voltage-gated channel, subfamily H (eag-related), member 1                  | 0.646 | 0.614 | 1.05 |
| <i>KCNG1</i>        | potassium voltage-gated channel, subfamily G, member 1                                | 0.639 | 0.617 | 1.04 |
| <i>APH1B</i>        | anterior pharynx defective 1 homolog B ( <i>C. elegans</i> )                          | 0.636 | 0.59  | 1.08 |
| <i>PDP2</i>         | pyruvate dehydrogenase phosphatase catalytic subunit 2                                | 0.632 | 1.169 | 0.54 |
| <i>ADNP2</i>        | ADNP homeobox 2                                                                       | 0.629 | 0.649 | 0.97 |
| <i>LOC731275</i>    | hypothetical LOC731275                                                                | 0.629 | 0.679 | 0.93 |
| <i>CSF2RA</i>       | colony stimulating factor 2 receptor, alpha, low-affinity (granulocyte-macrophage)    | 0.628 | 0.813 | 0.77 |
| <i>ZNF223</i>       | zinc finger protein 223                                                               | 0.628 | 0.832 | 0.75 |
| <i>COL8A1</i>       | collagen, type VIII, alpha 1                                                          | 0.626 | 1.313 | 0.48 |
| <i>TNFSF15</i>      | tumor necrosis factor (ligand) superfamily, member 15                                 | 0.626 | 0.712 | 0.88 |
| <i>ZBTB41</i>       | zinc finger and BTB domain containing 41                                              | 0.626 | 0.653 | 0.96 |

|                   |                                                                                            |        |        |      |
|-------------------|--------------------------------------------------------------------------------------------|--------|--------|------|
| <i>E2F3</i>       | E2F transcription factor 3                                                                 | 0.625  | 0.611  | 1.02 |
| <i>TDG</i>        | thymine-DNA glycosylase                                                                    | 0.625  | 0.597  | 1.05 |
| <i>SGSH</i>       | N-sulfoglucosamine sulfohydrolase                                                          | 0.624  | 0.603  | 1.03 |
| <i>TMEM63A</i>    | transmembrane protein 63A                                                                  | 0.624  | 0.724  | 0.86 |
| <i>INTS6</i>      | integrator complex subunit 6                                                               | 0.623  | 0.794  | 0.78 |
| <i>MAK16</i>      | MAK16 homolog ( <i>S. cerevisiae</i> )                                                     | 0.622  | 0.635  | 0.98 |
| <i>AKAP8L</i>     | A kinase (PRKA) anchor protein 8-like                                                      | 0.621  | 0.745  | 0.83 |
| <i>MAP3K1</i>     | mitogen-activated protein kinase kinase kinase 1                                           | 0.62   | 0.722  | 0.86 |
| <i>NCRNA00152</i> | non-protein coding RNA 152                                                                 | 0.62   | 1.34   | 0.46 |
| <i>TCF20</i>      | transcription factor 20 (AR1)                                                              | 0.617  | 0.673  | 0.92 |
| <i>C5ORF28</i>    | chromosome 5 open reading frame 28                                                         | 0.615  | 0.903  | 0.68 |
| <i>ATXN2L</i>     | ataxin 2-like                                                                              | 0.614  | 0.869  | 0.71 |
| <i>CTSC</i>       | cathepsin C                                                                                | 0.614  | 1.075  | 0.57 |
| <i>CCR6</i>       | chemokine (C-C motif) receptor 6                                                           | 0.611  | 0.716  | 0.85 |
| <i>ZNF93</i>      | zinc finger protein 93                                                                     | 0.61   | 0.658  | 0.93 |
| <i>LILRB1</i>     | leukocyte immunoglobulin-like receptor, subfamily B (with TM and ITIM domains), member 1   | 0.607  | 0.657  | 0.92 |
| <i>LOC643509</i>  | dihydrofolate reductase pseudogene 1                                                       | 0.606  | 0.824  | 0.74 |
| <i>SLC3A2</i>     | solute carrier family 3 (activators of dibasic and neutral amino acid transport), member 2 | 0.606  | 0.589  | 1.03 |
| <i>UBAP1</i>      | ubiquitin associated protein 1                                                             | 0.605  | 0.603  | 1.00 |
| <i>ALPP</i>       | alkaline phosphatase, placental                                                            | 0.604  | 0.895  | 0.67 |
| <i>KLF3</i>       | Kruppel-like factor 3 (basic)                                                              | 0.604  | 0.591  | 1.02 |
| <i>CRYZL1</i>     | crystallin, zeta (quinone reductase)-like 1                                                | 0.603  | 0.769  | 0.78 |
| <i>ERRFI1</i>     | ERBB receptor feedback inhibitor 1                                                         | 0.602  | 1.084  | 0.56 |
| <i>PPM1K</i>      | protein phosphatase, Mg <sup>2+</sup> /Mn <sup>2+</sup> dependent, 1K                      | 0.601  | 0.861  | 0.70 |
| <i>TAF1A</i>      | TATA box binding protein (TBP)-associated factor, RNA polymerase I, A, 48kDa               | 0.601  | 0.717  | 0.84 |
| <i>LUZP1</i>      | leucine zipper protein 1                                                                   | 0.598  | 0.683  | 0.88 |
| <i>IL10</i>       | interleukin 10                                                                             | 0.596  | 0.823  | 0.72 |
| <i>NUBPL</i>      | nucleotide binding protein-like                                                            | 0.596  | 0.907  | 0.66 |
| <i>RIF1</i>       | RAP1 interacting factor homolog (yeast)                                                    | 0.595  | 0.635  | 0.94 |
| <i>C12ORF65</i>   | chromosome 12 open reading frame 65                                                        | 0.594  | 0.674  | 0.88 |
| <i>LIN54</i>      | lin-54 homolog ( <i>C. elegans</i> )                                                       | 0.593  | 0.688  | 0.86 |
| <i>RBM14</i>      | RNA binding motif protein 14                                                               | 0.593  | 0.981  | 0.60 |
| <i>ANKRD20A5</i>  | ankyrin repeat domain 20 family, member A5                                                 | 0.587  | 0.733  | 0.80 |
| <i>ZNF679</i>     | zinc finger protein 679                                                                    | -0.587 | -0.617 | 0.95 |
| <i>FAN1</i>       | FANCD2/FANCI-associated nuclease 1                                                         | -0.599 | -0.644 | 0.93 |
| <i>ASTE1</i>      | asteroid homolog 1 ( <i>Drosophila</i> )                                                   | -0.609 | -0.586 | 1.04 |
| <i>CYFIP2</i>     | cytoplasmic FMR1 interacting protein 2                                                     | -0.61  | -0.6   | 1.02 |
| <i>ZSCAN5A</i>    | zinc finger and SCAN domain containing 5A                                                  | -0.616 | -0.635 | 0.97 |
| <i>PKIB</i>       | protein kinase (cAMP-dependent, catalytic) inhibitor beta                                  | -0.617 | -0.594 | 1.04 |
| <i>SNX7</i>       | sorting nexin 7                                                                            | -0.62  | -0.619 | 1.00 |
| <i>CCNA1</i>      | cyclin A1                                                                                  | -0.621 | -0.659 | 0.94 |
| <i>ALG14</i>      | asparagine-linked glycosylation 14 homolog ( <i>S. cerevisiae</i> )                        | -0.629 | -0.822 | 0.77 |
| <i>IRX5</i>       | iroquois homeobox 5                                                                        | -0.634 | -0.976 | 0.65 |
| <i>SPATA18</i>    | spermatogenesis associated 18 homolog (rat)                                                | -0.634 | -0.617 | 1.03 |
| <i>DGCR14</i>     | DiGeorge syndrome critical region gene 14                                                  | -0.635 | -0.66  | 0.96 |
| <i>C3ORF55</i>    | chromosome 3 open reading frame 55                                                         | -0.637 | -0.685 | 0.93 |
| <i>NINJ2</i>      | ninjurin 2                                                                                 | -0.641 | -0.816 | 0.79 |
| <i>TXNDC5</i>     | thioredoxin domain containing 5 (endoplasmic reticulum)                                    | -0.643 | -0.764 | 0.84 |
| <i>MEIS1</i>      | Meis homeobox 1                                                                            | -0.646 | -0.612 | 1.06 |
| <i>ORAI3</i>      | ORAI calcium release-activated calcium modulator 3                                         | -0.655 | -0.673 | 0.97 |
| <i>TMEM45A</i>    | transmembrane protein 45A                                                                  | -0.657 | -0.605 | 1.09 |
| <i>CLDN2</i>      | claudin domain containing 2                                                                | -0.665 | -0.678 | 0.98 |

|                  |                                                                                                |        |        |      |
|------------------|------------------------------------------------------------------------------------------------|--------|--------|------|
| <i>GSDMA</i>     | gasdermin A                                                                                    | -0.669 | -1.076 | 0.62 |
| <i>CARD6</i>     | caspase recruitment domain family, member 6                                                    | -0.676 | -0.952 | 0.71 |
| <i>DEDD2</i>     | death effector domain containing 2                                                             | -0.678 | -0.612 | 1.11 |
| <i>EIF1AD</i>    | eukaryotic translation initiation factor 1A domain containing                                  | -0.685 | -0.808 | 0.85 |
| <i>IQCG</i>      | IQ motif containing G                                                                          | -0.688 | -0.712 | 0.97 |
| <i>C17ORF81</i>  | chromosome 17 open reading frame 81                                                            | -0.694 | -0.601 | 1.15 |
| <i>CTSZ</i>      | cathepsin Z                                                                                    | -0.694 | -0.755 | 0.92 |
| <i>LOC729264</i> | similar to TP53 target 3                                                                       | -0.695 | -0.637 | 1.09 |
| <i>NT5DC2</i>    | 5'-nucleotidase domain containing 2                                                            | -0.695 | -0.699 | 0.99 |
| <i>SALL1</i>     | sal-like 1 (Drosophila)                                                                        | -0.697 | -0.988 | 0.71 |
| <i>ID3</i>       | inhibitor of DNA binding 3, dominant negative helix-loop-helix protein                         | -0.698 | -0.682 | 1.02 |
| <i>SYNGR4</i>    | synaptogyrin 4                                                                                 | -0.702 | -0.987 | 0.71 |
| <i>MLYCD</i>     | malonyl-CoA decarboxylase                                                                      | -0.705 | -0.61  | 1.16 |
| <i>TBCC</i>      | tubulin folding cofactor C                                                                     | -0.706 | -0.928 | 0.76 |
| <i>FAM172A</i>   | family with sequence similarity 172, member A                                                  | -0.715 | -0.711 | 1.01 |
| <i>HOXA5</i>     | homeobox A5                                                                                    | -0.716 | -1.311 | 0.55 |
| <i>PPID</i>      | peptidylprolyl isomerase D                                                                     | -0.718 | -1.003 | 0.72 |
| <i>ANG</i>       | angiogenin, ribonuclease, RNase A family, 5                                                    | -0.72  | -0.814 | 0.88 |
| <i>C5ORF13</i>   | chromosome 5 open reading frame 13                                                             | -0.72  | -0.784 | 0.92 |
| <i>RALGDS</i>    | ral guanine nucleotide dissociation stimulator                                                 | -0.724 | -0.904 | 0.80 |
| <i>KRT19</i>     | keratin 19                                                                                     | -0.728 | -0.751 | 0.97 |
| <i>CDKN2C</i>    | cyclin-dependent kinase inhibitor 2C (p18, inhibits CDK4)                                      | -0.729 | -0.696 | 1.05 |
| <i>ALKBH4</i>    | alkB, alkylation repair homolog 4 (E. coli)                                                    | -0.73  | -0.675 | 1.08 |
| <i>ENC1</i>      | ectodermal-neural cortex 1 (with BTB-like domain)                                              | -0.731 | -1.055 | 0.69 |
| <i>MTMR12</i>    | myotubularin related protein 12                                                                | -0.735 | -0.772 | 0.95 |
| <i>SNAI1</i>     | snail homolog 1 (Drosophila)                                                                   | -0.736 | -2.228 | 0.33 |
| <i>FOXO4</i>     | forkhead box O4                                                                                | -0.737 | -0.593 | 1.24 |
| <i>GCSH</i>      | glycine cleavage system protein H (aminomethyl carrier)                                        | -0.739 | -0.616 | 1.20 |
| <i>KIAA1009</i>  | KIAA1009                                                                                       | -0.739 | -0.615 | 1.20 |
| <i>KCNMB4</i>    | potassium large conductance calcium-activated channel, subfamily M, beta member 4              | -0.741 | -0.617 | 1.20 |
| <i>ELOVL6</i>    | ELOVL family member 6, elongation of long chain fatty acids (FEN1/Elo2, SUR4/Elo3-like, yeast) | -0.746 | -0.63  | 1.18 |
| <i>LGR6</i>      | leucine-rich repeat-containing G protein-coupled receptor 6                                    | -0.746 | -0.683 | 1.09 |
| <i>KCTD12</i>    | potassium channel tetramerisation domain containing 12                                         | -0.747 | -0.622 | 1.20 |
| <i>DNAJB1</i>    | DnaJ (Hsp40) homolog, subfamily B, member 1                                                    | -0.75  | -0.765 | 0.98 |
| <i>SERTAD4</i>   | SERTA domain containing 4                                                                      | -0.753 | -0.821 | 0.92 |
| <i>ZCCHC5</i>    | zinc finger, CCHC domain containing 5                                                          | -0.755 | -1.195 | 0.63 |
| <i>FMO4</i>      | flavin containing monooxygenase 4                                                              | -0.756 | -0.667 | 1.13 |
| <i>BRMS1L</i>    | breast cancer metastasis-suppressor 1-like                                                     | -0.76  | -0.603 | 1.26 |
| <i>FLJ45244</i>  | hypothetical locus FLJ45244                                                                    | -0.761 | -1.035 | 0.74 |
| <i>PXMP4</i>     | peroxisomal membrane protein 4, 24kDa                                                          | -0.761 | -0.59  | 1.29 |
| <i>LOC286254</i> | hypothetical protein LOC286254                                                                 | -0.764 | -0.888 | 0.86 |
| <i>PDZK1</i>     | PDZ domain containing 1                                                                        | -0.765 | -0.993 | 0.77 |
| <i>TAF5L</i>     | TAF5-like RNA polymerase II, p300/CBP-associated factor (PCAF)-associated factor, 65kDa        | -0.766 | -1.015 | 0.75 |
| <i>KRT15</i>     | keratin 15                                                                                     | -0.769 | -0.704 | 1.09 |
| <i>GAD1</i>      | glutamate decarboxylase 1 (brain, 67kDa)                                                       | -0.77  | -0.653 | 1.18 |
| <i>IFFO1</i>     | intermediate filament family orphan 1                                                          | -0.77  | -0.684 | 1.13 |
| <i>SLC47A2</i>   | solute carrier family 47, member 2                                                             | -0.773 | -0.776 | 1.00 |
| <i>SAMD11</i>    | sterile alpha motif domain containing 11                                                       | -0.776 | -0.702 | 1.11 |
| <i>KBTD11</i>    | kelch repeat and BTB (POZ) domain containing 11                                                | -0.777 | -1.103 | 0.70 |
| <i>FAM46B</i>    | family with sequence similarity 46, member B                                                   | -0.786 | -0.805 | 0.98 |

|                 |                                                                                                 |        |        |      |
|-----------------|-------------------------------------------------------------------------------------------------|--------|--------|------|
| <i>MAPK14</i>   | mitogen-activated protein kinase 14                                                             | -0.787 | -0.705 | 1.12 |
| <i>RASAL1</i>   | RAS protein activator like 1 (GAP1 like)                                                        | -0.788 | -0.766 | 1.03 |
| <i>CD24</i>     | CD24 molecule                                                                                   | -0.795 | -0.663 | 1.20 |
| <i>RHOBTB2</i>  | Rho-related BTB domain containing 2                                                             | -0.8   | -0.625 | 1.28 |
| <i>ANKRD36B</i> | ankyrin repeat domain 36B                                                                       | -0.806 | -0.675 | 1.19 |
| <i>EGR1</i>     | early growth response 1                                                                         | -0.811 | -1.635 | 0.50 |
| <i>VRK3</i>     | vaccinia related kinase 3                                                                       | -0.812 | -0.907 | 0.90 |
| <i>ANGPT1</i>   | angiopoietin 1                                                                                  | -0.814 | -0.593 | 1.37 |
| <i>TP53TG1</i>  | TP53 target 1 (non-protein coding)                                                              | -0.818 | -0.672 | 1.22 |
| <i>SCRN3</i>    | secernin 3                                                                                      | -0.82  | -0.6   | 1.37 |
| <i>TCFL5</i>    | transcription factor-like 5 (basic helix-loop-helix)                                            | -0.821 | -0.635 | 1.29 |
| <i>PLAA</i>     | phospholipase A2-activating protein                                                             | -0.822 | -0.672 | 1.22 |
| <i>AGPAT5</i>   | 1-acylglycerol-3-phosphate O-acyltransferase 5 (lysophosphatidic acid acyltransferase, epsilon) | -0.823 | -0.668 | 1.23 |
| <i>ARID3A</i>   | AT rich interactive domain 3A (BRIGHT-like)                                                     | -0.827 | -0.924 | 0.90 |
| <i>IGSF5</i>    | immunoglobulin superfamily, member 5                                                            | -0.829 | -1.098 | 0.76 |
| <i>PEX1</i>     | peroxisomal biogenesis factor 1                                                                 | -0.832 | -0.764 | 1.09 |
| <i>RDH5</i>     | retinol dehydrogenase 5 (11-cis/9-cis)                                                          | -0.833 | -0.951 | 0.88 |
| <i>HNF1B</i>    | HNF1 homeobox B                                                                                 | -0.84  | -1.099 | 0.76 |
| <i>TSPAN8</i>   | tetraspanin 8                                                                                   | -0.843 | -0.895 | 0.94 |
| <i>ZNF138</i>   | zinc finger protein 138                                                                         | -0.845 | -0.652 | 1.30 |
| <i>NR2F2</i>    | nuclear receptor subfamily 2, group F, member 2                                                 | -0.848 | -0.616 | 1.38 |
| <i>SFT2D3</i>   | SFT2 domain containing 3                                                                        | -0.849 | -0.618 | 1.37 |
| <i>WDR81</i>    | WD repeat domain 81                                                                             | -0.849 | -0.956 | 0.89 |
| <i>LPCAT1</i>   | lysophosphatidylcholine acyltransferase 1                                                       | -0.852 | -0.912 | 0.93 |
| <i>AFMID</i>    | arylformamidase                                                                                 | -0.857 | -1.128 | 0.76 |
| <i>TARBP2</i>   | TAR (HIV-1) RNA binding protein 2                                                               | -0.858 | -0.659 | 1.30 |
| <i>HOXA9</i>    | homeobox A9                                                                                     | -0.859 | -1.097 | 0.78 |
| <i>C5ORF39</i>  | chromosome 5 open reading frame 39                                                              | -0.86  | -1.085 | 0.79 |
| <i>HOXD1</i>    | homeobox D1                                                                                     | -0.863 | -1.175 | 0.73 |
| <i>PIAS2</i>    | protein inhibitor of activated STAT, 2                                                          | -0.867 | -0.963 | 0.90 |
| <i>METTL7B</i>  | methyltransferase like 7B                                                                       | -0.871 | -0.948 | 0.92 |
| <i>ZNF174</i>   | zinc finger protein 174                                                                         | -0.874 | -0.631 | 1.39 |
| <i>BCDIN3D</i>  | BCDIN3 domain containing                                                                        | -0.879 | -0.655 | 1.34 |
| <i>RPS26</i>    | ribosomal protein S26                                                                           | -0.883 | -0.802 | 1.10 |
| <i>CHCHD7</i>   | coiled-coil-helix-coiled-coil-helix domain containing 7                                         | -0.886 | -0.811 | 1.09 |
| <i>ANKRD36</i>  | ankyrin repeat domain 36                                                                        | -0.888 | -0.597 | 1.49 |
| <i>C1ORF103</i> | chromosome 1 open reading frame 103                                                             | -0.89  | -0.615 | 1.45 |
| <i>FZD1</i>     | frizzled homolog 1 (Drosophila)                                                                 | -0.894 | -0.812 | 1.10 |
| <i>UBL3</i>     | ubiquitin-like 3                                                                                | -0.894 | -1.17  | 0.76 |
| <i>TRIM9</i>    | tripartite motif-containing 9                                                                   | -0.895 | -0.712 | 1.26 |
| <i>ZMAT3</i>    | zinc finger, matrin type 3                                                                      | -0.895 | -1.023 | 0.87 |
| <i>HSPA1A</i>   | heat shock 70kDa protein 1A                                                                     | -0.903 | -1.233 | 0.73 |
| <i>FGFR1</i>    | fibroblast growth factor receptor 1                                                             | -0.911 | -0.605 | 1.51 |
| <i>TM2D2</i>    | TM2 domain containing 2                                                                         | -0.913 | -0.728 | 1.25 |
| <i>B3GNT1</i>   | UDP-GlcNAc:betaGal beta-1,3-N-acetylglucosaminyltransferase 1                                   | -0.914 | -0.597 | 1.53 |
| <i>EFNA4</i>    | ephrin-A4                                                                                       | -0.914 | -0.637 | 1.43 |
| <i>DLEU1</i>    | deleted in lymphocytic leukemia 1 (non-protein coding)                                          | -0.915 | -0.785 | 1.17 |
| <i>WDR37</i>    | WD repeat domain 37                                                                             | -0.915 | -1.184 | 0.77 |
| <i>C7ORF57</i>  | chromosome 7 open reading frame 57                                                              | -0.918 | -0.771 | 1.19 |
| <i>GLI2</i>     | GLI family zinc finger 2                                                                        | -0.925 | -1.06  | 0.87 |
| <i>NUDT6</i>    | nudix (nucleoside diphosphate linked moiety X)-type motif 6                                     | -0.927 | -0.721 | 1.29 |
| <i>PYROXD2</i>  | pyridine nucleotide-disulphide oxidoreductase domain 2                                          | -0.935 | -0.744 | 1.26 |
| <i>RIN1</i>     | Ras and Rab interactor 1                                                                        | -0.937 | -0.743 | 1.26 |

|                    |                                                                                   |        |        |      |
|--------------------|-----------------------------------------------------------------------------------|--------|--------|------|
| <i>C21ORF58</i>    | chromosome 21 open reading frame 58                                               | -0.938 | -0.784 | 1.20 |
| <i>ID2</i>         | inhibitor of DNA binding 2, dominant negative helix-loop-helix protein            | -0.944 | -2.563 | 0.37 |
| <i>FARP1</i>       | FERM, RhoGEF (ARHGEF) and pleckstrin domain protein 1 (chondrocyte-derived)       | -0.945 | -0.762 | 1.24 |
| <i>ZNF341</i>      | zinc finger protein 341                                                           | -0.946 | -1.093 | 0.87 |
| <i>TEK</i>         | TEK tyrosine kinase, endothelial                                                  | -0.948 | -0.884 | 1.07 |
| <i>RANBP6</i>      | RAN binding protein 6                                                             | -0.957 | -0.792 | 1.21 |
| <i>MEIG1</i>       | meiosis expressed gene 1 homolog (mouse)                                          | -0.959 | -0.707 | 1.36 |
| <i>BCL7C</i>       | B-cell CLL/lymphoma 7C                                                            | -0.96  | -0.641 | 1.50 |
| <i>FOS</i>         | FBJ murine osteosarcoma viral oncogene homolog                                    | -0.96  | -2.555 | 0.38 |
| <i>ACPL2</i>       | acid phosphatase-like 2                                                           | -0.964 | -0.826 | 1.17 |
| <i>SMPX</i>        | small muscle protein, X-linked                                                    | -0.965 | -0.932 | 1.04 |
| <i>PEX11A</i>      | peroxisomal biogenesis factor 11 alpha                                            | -0.966 | -0.619 | 1.56 |
| <i>IER5L</i>       | immediate early response 5-like                                                   | -0.967 | -0.862 | 1.12 |
| <i>MTERF</i>       | mitochondrial transcription termination factor                                    | -0.971 | -0.843 | 1.15 |
| <i>NDRG4</i>       | NDRG family member 4                                                              | -0.973 | -0.646 | 1.51 |
| <i>MAPKAP1</i>     | mitogen-activated protein kinase associated protein 1                             | -0.976 | -0.869 | 1.12 |
| <i>BRD8</i>        | bromodomain containing 8                                                          | -0.978 | -0.6   | 1.63 |
| <i>RBM4B</i>       | RNA binding motif protein 4B                                                      | -0.981 | -0.731 | 1.34 |
| <i>RASSF9</i>      | Ras association (RalGDS/AF-6) domain family (N-terminal) member 9                 | -0.986 | -0.702 | 1.40 |
| <i>SIRT4</i>       | sirtuin 4                                                                         | -0.987 | -1.172 | 0.84 |
| <i>FLJ35934</i>    | FLJ35934                                                                          | -0.991 | -0.936 | 1.06 |
| <i>LHX8</i>        | LIM homeobox 8                                                                    | -0.996 | -0.591 | 1.69 |
| <i>ZNF616</i>      | zinc finger protein 616                                                           | -1.006 | -1.008 | 1.00 |
| <i>HSPA1B</i>      | heat shock 70kDa protein 1B                                                       | -1.008 | -1.646 | 0.61 |
| <i>LOC652726</i>   | similar to ankyrin repeat domain 36                                               | -1.015 | -0.761 | 1.33 |
| <i>ENPP2</i>       | ectonucleotide pyrophosphatase/phosphodiesterase 2                                | -1.019 | -0.724 | 1.41 |
| <i>C8ORF51</i>     | chromosome 8 open reading frame 51                                                | -1.02  | -0.693 | 1.47 |
| <i>TMEM37</i>      | transmembrane protein 37                                                          | -1.022 | -0.616 | 1.66 |
| <i>TMEM143</i>     | transmembrane protein 143                                                         | -1.025 | -0.9   | 1.14 |
| <i>INHBB</i>       | inhibin, beta B                                                                   | -1.026 | -0.641 | 1.60 |
| <i>NCRNA00256A</i> | non-protein coding RNA 256A                                                       | -1.028 | -0.712 | 1.44 |
| <i>C18ORF55</i>    | chromosome 18 open reading frame 55                                               | -1.029 | -0.741 | 1.39 |
| <i>SPATA7</i>      | spermatogenesis associated 7                                                      | -1.036 | -0.812 | 1.28 |
| <i>ZKSCAN4</i>     | zinc finger with KRAB and SCAN domains 4                                          | -1.038 | -1.366 | 0.76 |
| <i>ZKSCAN3</i>     | zinc finger with KRAB and SCAN domains 3                                          | -1.039 | -0.637 | 1.63 |
| <i>STARD5</i>      | StAR-related lipid transfer (START) domain containing 5                           | -1.041 | -1.196 | 0.87 |
| <i>LOC93622</i>    | hypothetical LOC93622                                                             | -1.049 | -0.725 | 1.45 |
| <i>CCDC15</i>      | coiled-coil domain containing 15                                                  | -1.054 | -0.632 | 1.67 |
| <i>HOXC13</i>      | homeobox C13                                                                      | -1.061 | -0.619 | 1.71 |
| <i>GMCL1</i>       | germ cell-less homolog 1 (Drosophila)                                             | -1.071 | -0.713 | 1.50 |
| <i>KIFC1</i>       | kinesin family member C1                                                          | -1.081 | -0.609 | 1.78 |
| <i>ZNF792</i>      | zinc finger protein 792                                                           | -1.081 | -1.145 | 0.94 |
| <i>CITED2</i>      | Cbp/p300-interacting transactivator, with Glu/Asp-rich carboxy-terminal domain, 2 | -1.085 | -0.746 | 1.45 |
| <i>SLC29A3</i>     | solute carrier family 29 (nucleoside transporters), member 3                      | -1.094 | -0.901 | 1.21 |
| <i>PCTP</i>        | phosphatidylcholine transfer protein                                              | -1.097 | -1.09  | 1.01 |
| <i>FOXQ1</i>       | forkhead box Q1                                                                   | -1.098 | -0.847 | 1.30 |
| <i>WRB</i>         | tryptophan rich basic protein                                                     | -1.106 | -0.863 | 1.28 |
| <i>RAD9A</i>       | RAD9 homolog A (S. pombe)                                                         | -1.109 | -0.637 | 1.74 |
| <i>ZNF823</i>      | zinc finger protein 823                                                           | -1.123 | -0.701 | 1.60 |
| <i>RGS2</i>        | regulator of G-protein signaling 2, 24kDa                                         | -1.124 | -1.914 | 0.59 |
| <i>SNORD14C</i>    | small nucleolar RNA, C/D box 14C                                                  | -1.124 | -0.714 | 1.57 |

|                 |                                                                              |        |        |      |
|-----------------|------------------------------------------------------------------------------|--------|--------|------|
| <i>CEL</i>      | carboxyl ester lipase (bile salt-stimulated lipase)                          | -1.13  | -1.051 | 1.08 |
| <i>MUM1</i>     | melanoma associated antigen (mutated) 1                                      | -1.13  | -0.658 | 1.72 |
| <i>OSGEPL1</i>  | O-sialoglycoprotein endopeptidase-like 1                                     | -1.137 | -0.667 | 1.70 |
| <i>HNRNPA0</i>  | heterogeneous nuclear ribonucleoprotein A0                                   | -1.14  | -0.82  | 1.39 |
| <i>GAS1</i>     | growth arrest-specific 1                                                     | -1.141 | -0.735 | 1.55 |
| <i>VWA5A</i>    | von Willebrand factor A domain containing 5A                                 | -1.142 | -1     | 1.14 |
| <i>C12ORF76</i> | chromosome 12 open reading frame 76                                          | -1.152 | -0.716 | 1.61 |
| <i>RAB26</i>    | RAB26, member RAS oncogene family                                            | -1.156 | -1.267 | 0.91 |
| <i>GPAM</i>     | glycerol-3-phosphate acyltransferase, mitochondrial                          | -1.159 | -0.942 | 1.23 |
| <i>ABCB9</i>    | ATP-binding cassette, sub-family B (MDR/TAP), member 9                       | -1.164 | -0.589 | 1.98 |
| <i>FLJ22184</i> | hypothetical protein FLJ22184                                                | -1.165 | -0.854 | 1.36 |
| <i>HOXB5</i>    | homeobox B5                                                                  | -1.178 | -1.128 | 1.04 |
| <i>RSN1L</i>    | round spermatid basic protein 1-like                                         | -1.178 | -1.138 | 1.04 |
| <i>HMGCR</i>    | 3-hydroxy-3-methylglutaryl-CoA reductase                                     | -1.184 | -0.827 | 1.43 |
| <i>RAB4A</i>    | RAB4A, member RAS oncogene family                                            | -1.191 | -0.972 | 1.23 |
| <i>MEF2C</i>    | myocyte enhancer factor 2C                                                   | -1.192 | -0.77  | 1.55 |
| <i>C17ORF97</i> | chromosome 17 open reading frame 97                                          | -1.199 | -0.794 | 1.51 |
| <i>GALM</i>     | galactose mutarotase (aldose 1-epimerase)                                    | -1.208 | -0.759 | 1.59 |
| <i>NFIA</i>     | nuclear factor I/A                                                           | -1.211 | -0.682 | 1.78 |
| <i>ZNF254</i>   | zinc finger protein 254                                                      | -1.215 | -1.092 | 1.11 |
| <i>PITX2</i>    | paired-like homeodomain 2                                                    | -1.219 | -0.795 | 1.53 |
| <i>TMCC1</i>    | transmembrane and coiled-coil domain family 1                                | -1.225 | -0.939 | 1.30 |
| <i>C9ORF169</i> | chromosome 9 open reading frame 169                                          | -1.227 | -1.004 | 1.22 |
| <i>POLH</i>     | polymerase (DNA directed), eta                                               | -1.229 | -0.64  | 1.92 |
| <i>PUS7L</i>    | pseudouridylate synthase 7 homolog ( <i>S. cerevisiae</i> )-like             | -1.231 | -0.765 | 1.61 |
| <i>ALDH3A1</i>  | aldehyde dehydrogenase 3 family, member A1                                   | -1.254 | -0.648 | 1.94 |
| <i>FZD4</i>     | frizzled homolog 4 ( <i>Drosophila</i> )                                     | -1.263 | -0.883 | 1.43 |
| <i>HOXA6</i>    | homeobox A6                                                                  | -1.264 | -1.361 | 0.93 |
| <i>SORBS1</i>   | sorbin and SH3 domain containing 1                                           | -1.276 | -0.995 | 1.28 |
| <i>DEPDC7</i>   | DEP domain containing 7                                                      | -1.286 | -0.724 | 1.78 |
| <i>SP8</i>      | Sp8 transcription factor                                                     | -1.286 | -0.727 | 1.77 |
| <i>KANK2</i>    | KN motif and ankyrin repeat domains 2                                        | -1.287 | -0.614 | 2.10 |
| <i>SLC2A12</i>  | solute carrier family 2 (facilitated glucose transporter), member 12         | -1.287 | -0.668 | 1.93 |
| <i>FAM81A</i>   | family with sequence similarity 81, member A                                 | -1.289 | -0.841 | 1.53 |
| <i>MEX3B</i>    | mex-3 homolog B ( <i>C. elegans</i> )                                        | -1.3   | -1.005 | 1.29 |
| <i>EPOR</i>     | erythropoietin receptor                                                      | -1.302 | -0.627 | 2.08 |
| <i>PIM2</i>     | pim-2 oncogene                                                               | -1.308 | -0.976 | 1.34 |
| <i>TP53INP1</i> | tumor protein p53 inducible nuclear protein 1                                | -1.31  | -1.415 | 0.93 |
| <i>ZNF30</i>    | zinc finger protein 30                                                       | -1.31  | -0.874 | 1.50 |
| <i>DMRT1</i>    | doublesex and mab-3 related transcription factor 1                           | -1.316 | -0.811 | 1.62 |
| <i>SESN1</i>    | sestrin 1                                                                    | -1.316 | -1.488 | 0.88 |
| <i>SPHAR</i>    | S-phase response (cyclin related)                                            | -1.316 | -0.868 | 1.52 |
| <i>CLDN2</i>    | claudin 2                                                                    | -1.317 | -0.615 | 2.14 |
| <i>PSRC1</i>    | proline/serine-rich coiled-coil 1                                            | -1.318 | -0.984 | 1.34 |
| <i>HOXA10</i>   | homeobox A10                                                                 | -1.321 | -1.001 | 1.32 |
| <i>SPC25</i>    | SPC25, NDC80 kinetochore complex component, homolog ( <i>S. cerevisiae</i> ) | -1.326 | -0.889 | 1.49 |
| <i>C6ORF165</i> | chromosome 6 open reading frame 165                                          | -1.331 | -0.824 | 1.62 |
| <i>CSTF1</i>    | cleavage stimulation factor, 3' pre-RNA, subunit 1, 50kDa                    | -1.331 | -0.636 | 2.09 |
| <i>FABP5L3</i>  | fatty acid binding protein 5-like 3 (pseudogene)                             | -1.352 | -1.129 | 1.20 |
| <i>OSBPL7</i>   | oxysterol binding protein-like 7                                             | -1.352 | -1.032 | 1.31 |
| <i>C13ORF34</i> | chromosome 13 open reading frame 34                                          | -1.358 | -0.71  | 1.91 |
| <i>EPCAM</i>    | epithelial cell adhesion molecule                                            | -1.358 | -0.905 | 1.50 |
| <i>JAKMIP2</i>  | janus kinase and microtubule interacting protein 2                           | -1.36  | -0.627 | 2.17 |

|                  |                                                                             |        |        |      |
|------------------|-----------------------------------------------------------------------------|--------|--------|------|
| <i>MXD3</i>      | MAX dimerization protein 3                                                  | -1.364 | -0.811 | 1.68 |
| <i>BAG3</i>      | BCL2-associated athanogene 3                                                | -1.383 | -1.035 | 1.34 |
| <i>MAT2B</i>     | methionine adenosyltransferase II, beta                                     | -1.409 | -0.657 | 2.14 |
| <i>FAM102B</i>   | family with sequence similarity 102, member B                               | -1.413 | -1.09  | 1.30 |
| <i>SRPK2</i>     | SRSF protein kinase 2                                                       | -1.413 | -0.807 | 1.75 |
| <i>PCDH7</i>     | protocadherin 7                                                             | -1.415 | -0.691 | 2.05 |
| <i>APLN</i>      | apelin                                                                      | -1.42  | -0.616 | 2.31 |
| <i>KIAA1804</i>  | mixed lineage kinase 4                                                      | -1.425 | -0.755 | 1.89 |
| <i>RNASEL</i>    | ribonuclease L (2',5'-oligoadenylate synthetase-dependent)                  | -1.426 | -0.976 | 1.46 |
| <i>MEGF9</i>     | multiple EGF-like-domains 9                                                 | -1.427 | -0.602 | 2.37 |
| <i>TRIM6</i>     | tripartite motif-containing 6                                               | -1.439 | -0.791 | 1.82 |
| <i>ALDH5A1</i>   | aldehyde dehydrogenase 5 family, member A1                                  | -1.446 | -0.801 | 1.81 |
| <i>ADORA1</i>    | adenosine A1 receptor                                                       | -1.449 | -0.746 | 1.94 |
| <i>TRIM16L</i>   | tripartite motif-containing 16-like                                         | -1.454 | -1.436 | 1.01 |
| <i>HSPA1L</i>    | heat shock 70kDa protein 1-like                                             | -1.458 | -1.523 | 0.96 |
| <i>FAM78B</i>    | family with sequence similarity 78, member B                                | -1.468 | -0.817 | 1.80 |
| <i>EFCAB7</i>    | EF-hand calcium binding domain 7                                            | -1.471 | -0.619 | 2.38 |
| <i>KANK1</i>     | KN motif and ankyrin repeat domains 1                                       | -1.49  | -0.948 | 1.57 |
| <i>SCN2A</i>     | sodium channel, voltage-gated, type II, alpha subunit                       | -1.494 | -0.872 | 1.71 |
| <i>TTC30B</i>    | tetratricopeptide repeat domain 30B                                         | -1.503 | -0.996 | 1.51 |
| <i>LFNG</i>      | LFNG O-fucosylpeptide 3-beta-N-acetylglucosaminyltransferase                | -1.51  | -1.696 | 0.89 |
| <i>NR2F1</i>     | nuclear receptor subfamily 2, group F, member 1                             | -1.513 | -0.921 | 1.64 |
| <i>DPYSL4</i>    | dihydropyrimidinase-like 4                                                  | -1.529 | -0.688 | 2.22 |
| <i>NKX3-2</i>    | NK3 homeobox 2                                                              | -1.545 | -1.089 | 1.42 |
| <i>MFNG</i>      | MFNG O-fucosylpeptide 3-beta-N-acetylglucosaminyltransferase                | -1.55  | -0.959 | 1.62 |
| <i>FAM83D</i>    | family with sequence similarity 83, member D                                | -1.574 | -0.614 | 2.56 |
| <i>BMP4</i>      | bone morphogenetic protein 4                                                | -1.577 | -1.119 | 1.41 |
| <i>RTN4RL1</i>   | reticulon 4 receptor-like 1                                                 | -1.583 | -0.781 | 2.03 |
| <i>VASH2</i>     | vasohibin 2                                                                 | -1.583 | -0.706 | 2.24 |
| <i>REEP1</i>     | receptor accessory protein 1                                                | -1.585 | -1.211 | 1.31 |
| <i>C1ORF116</i>  | chromosome 1 open reading frame 116                                         | -1.633 | -1.963 | 0.83 |
| <i>ORC1L</i>     | origin recognition complex, subunit 1-like ( <i>S. cerevisiae</i> )         | -1.646 | -0.701 | 2.35 |
| <i>C9ORF100</i>  | chromosome 9 open reading frame 100                                         | -1.658 | -0.886 | 1.87 |
| <i>SGK223</i>    | homolog of rat pragma of Rnd2                                               | -1.668 | -1.422 | 1.17 |
| <i>CCDC110</i>   | coiled-coil domain containing 110                                           | -1.671 | -1.505 | 1.11 |
| <i>NFATC3</i>    | nuclear factor of activated T-cells, cytoplasmic, calcineurin-dependent 3   | -1.681 | -0.712 | 2.36 |
| <i>AQP11</i>     | aquaporin 11                                                                | -1.704 | -1.19  | 1.43 |
| <i>HOXA11</i>    | homeobox A11                                                                | -1.713 | -1.866 | 0.92 |
| <i>CPM</i>       | carboxypeptidase M                                                          | -1.725 | -1.651 | 1.04 |
| <i>ZNF114</i>    | zinc finger protein 114                                                     | -1.725 | -1.582 | 1.09 |
| <i>DFFB</i>      | DNA fragmentation factor, 40kDa, beta polypeptide (caspase-activated DNase) | -1.74  | -0.741 | 2.35 |
| <i>ZNF395</i>    | zinc finger protein 395                                                     | -1.742 | -1.181 | 1.48 |
| <i>BCMO1</i>     | beta-carotene 15,15'-monooxygenase 1                                        | -1.749 | -1.266 | 1.38 |
| <i>LOC285419</i> | hypothetical LOC285419                                                      | -1.758 | -1.272 | 1.38 |
| <i>AXIN2</i>     | axin 2                                                                      | -1.774 | -1.502 | 1.18 |
| <i>LMCD1</i>     | LIM and cysteine-rich domains 1                                             | -1.81  | -1.129 | 1.60 |
| <i>PASK</i>      | PAS domain containing serine/threonine kinase                               | -1.814 | -0.762 | 2.38 |
| <i>HEXIM2</i>    | hexamethylene bis-acetamide inducible 2                                     | -1.828 | -1.432 | 1.28 |
| <i>ID1</i>       | inhibitor of DNA binding 1, dominant negative helix-loop-helix protein      | -1.83  | -3.169 | 0.58 |
| <i>NRG4</i>      | neuregulin 4                                                                | -1.831 | -0.98  | 1.87 |

|                  |                                                                 |        |        |      |
|------------------|-----------------------------------------------------------------|--------|--------|------|
| <i>GPR19</i>     | G protein-coupled receptor 19                                   | -1.847 | -1.14  | 1.62 |
| <i>ARHGEF37</i>  | Rho guanine nucleotide exchange factor (GEF) 37                 | -1.852 | -1.24  | 1.49 |
| <i>C20ORF177</i> | chromosome 20 open reading frame 177                            | -1.855 | -1.427 | 1.30 |
| <i>HSPA2</i>     | heat shock 70kDa protein 2                                      | -1.855 | -1.161 | 1.60 |
| <i>HSPA2</i>     | heat shock 70kDa protein 2                                      | -1.861 | -1.208 | 1.54 |
| <i>CXXC4</i>     | CXXC finger 4                                                   | -1.883 | -1.271 | 1.48 |
| <i>C21ORF122</i> | chromosome 21 open reading frame 122                            | -1.896 | -1.489 | 1.27 |
| <i>MAP2K6</i>    | mitogen-activated protein kinase kinase 6                       | -1.897 | -1.138 | 1.67 |
| <i>FAM46C</i>    | family with sequence similarity 46, member C                    | -1.922 | -2.098 | 0.92 |
| <i>EPN3</i>      | epsin 3                                                         | -1.929 | -0.828 | 2.33 |
| <i>E2F8</i>      | E2F transcription factor 8                                      | -1.952 | -1.369 | 1.43 |
| <i>TEX19</i>     | testis expressed 19                                             | -1.966 | -1.078 | 1.82 |
| <i>LOC158376</i> | hypothetical LOC158376                                          | -1.969 | -1.541 | 1.28 |
| <i>TRIM59</i>    | tripartite motif-containing 59                                  | -1.969 | -0.749 | 2.63 |
| <i>SKP2</i>      | S-phase kinase-associated protein 2 (p45)                       | -1.992 | -1.291 | 1.54 |
| <i>RPRM</i>      | reprimin, TP53 dependent G2 arrest mediator candidate           | -2.005 | -1.932 | 1.04 |
| <i>CSRNP3</i>    | cysteine-serine-rich nuclear protein 3                          | -2.011 | -1.4   | 1.44 |
| <i>HSPA8</i>     | heat shock 70kDa protein 8                                      | -2.014 | -0.903 | 2.23 |
| <i>ARMCX2</i>    | armadillo repeat containing, X-linked 2                         | -2.064 | -1.228 | 1.68 |
| <i>PANK1</i>     | pantothenate kinase 1                                           | -2.091 | -1.427 | 1.47 |
| <i>GCNT1</i>     | glucosaminyl (N-acetyl) transferase 1, core 2                   | -2.145 | -1.518 | 1.41 |
| <i>SUOX</i>      | sulfite oxidase                                                 | -2.145 | -1.139 | 1.88 |
| <i>S1PR5</i>     | sphingosine-1-phosphate receptor 5                              | -2.182 | -1.491 | 1.46 |
| <i>MAGEE1</i>    | melanoma antigen family E, 1                                    | -2.265 | -0.795 | 2.85 |
| <i>KBTD7</i>     | kelch repeat and BTB (POZ) domain containing 7                  | -2.277 | -1.735 | 1.31 |
| <i>PK4</i>       | pyruvate dehydrogenase kinase, isozyme 4                        | -2.277 | -1.343 | 1.70 |
| <i>HRCT1</i>     | histidine rich carboxyl terminus 1                              | -2.384 | -1.503 | 1.59 |
| <i>EEPD1</i>     | endonuclease/exonuclease/phosphatase family domain containing 1 | -2.478 | -1.328 | 1.87 |
| <i>GPER</i>      | G protein-coupled estrogen receptor 1                           | -2.49  | -1.073 | 2.32 |
| <i>DMRT2</i>     | doublesex and mab-3 related transcription factor 2              | -2.558 | -1.695 | 1.51 |
| <i>OTX1</i>      | orthodenticle homeobox 1                                        | -2.56  | -1.562 | 1.64 |
| <i>PPP1R3C</i>   | protein phosphatase 1, regulatory (inhibitor) subunit 3C        | -2.681 | -2.876 | 0.93 |
| <i>VAV3</i>      | vav 3 guanine nucleotide exchange factor                        | -2.703 | -1.612 | 1.68 |
| <i>PLCH1</i>     | phospholipase C, eta 1                                          | -2.708 | -0.962 | 2.81 |
